# Supplementary material for: Regulatory microRNAs and phasiRNAs of paclitaxel biosynthesis in Taxus chinensis
Source: Front Plant Sci. 2024 May 8;15:1403060. doi: 10.3389/fpls.2024.1403060 (PMC11109412; doi:10.3389/fpls.2024.1403060)
Supplement: Supplementary file 2 [file Table_1.xlsx]

## Sheet: Sheet1
Table S10 TPM of TFs in Taxus chinensis.
Gene id	TF Family	Enshi	Enshi	Enshi	Enshi	cell line	cell line	B8h-MJ	B8h_CK	B4h-MJ	B4h_CK	B2h-MJ	B2h_CK	B24h-MJ	B24h_CK	B0h-MJ	B0h_CK	cell line	cell line	cell line	cell line	cell line	cell line	root	root	root	leaf	leaf	leaf	cone	cone	cone	bark	bark	bark	leaf	leaf	leaf	cone	cone	cone	root	root	root	bark	bark	bark
gene-KI387_000025	C3H	30.5	31.03	33.15	24.55	20.09	25.04	29.25	39.17	46	40.75	35.53	58.95	15.95	26.95	47.74	56.78	59.14	58.15	57.77	36.4	33.95	26.79	64.6	61.05	58.76	52.78	62.23	48.01	70.62	82.5	78.25	136.73	136.41	129.38	69.2	53.97	65.87	109.89	120.76	143.83	36.22	51.07	49.9	145.29	141.78	151.03
gene-KI387_000126	C3H	7.23	8.75	7.12	5.18	3.55	0.42	1.85	1.72	1.38	1.31	1.13	2.33	1.5	1.84	1.86	1.28	2.12	1.7	1.1	0.96	0.98	1.26	14.16	13.91	13.42	11.04	12.17	12.97	24.28	22.93	27.31	10.99	13.85	13.08	12.59	13.19	14.2	23.43	23.84	25.46	7.71	9.35	11.44	9.05	7.73	9.36
gene-KI387_000155	BES1	0	0	0	0	0	0	0	0	0	0	0	0	0	0	0	0	0.21	0.57	0.2	0	0	0.08	0	0	0	0	0	0	0.87	1.03	0.64	0	0	0	0	0	0	9.2	9.04	8.68	0.14	0	0	0	0	0
gene-KI387_000193	MYB	0	0	0	0	0	0	0	0	0	0	0	0	0	0	0	0	0	0	0	0	0	0	0.85	0	0.6	0	0	0	14.68	12.02	9.06	0.18	0.17	0.17	0	0	0	4.2	4.81	3.39	0.51	0	0.16	0	0	0
gene-KI387_000195	MYB-related	0	0	0	0	0	0	0	0	0	0	0	0	0	0	0	0	0	0	0	0	0	0	0	0	0	0	0	0	10.11	14.79	24.54	0	0	0	0	0	0	0	0	0	0	0	0	0	0	0
gene-KI387_000196	MYB-related	0	0	0	0	0	0	0	0	0.12	0	0	0	0	0	0	0	0	0	0	0	0	0	0.32	0.54	1.2	0	0	0	9.62	8.34	10.9	1.05	1.15	1.29	0	0	0	6.64	5.12	4.82	0	0.16	0	0.13	0	0.38
gene-KI387_000211	MYB-related	0	0	0	0	0	0	0	0	0	0	0	0	0	0	0	0	0	0	0	0	0	0	0	0	0	0	0	0	7.59	7.82	6.54	0	0	0	0	0	0	0.29	0	0	0	0	0	0	0	0
gene-KI387_000215	MYB	0	0	0	0	0	0	0	0	0	0	0	0	0	0	0	0	0	0	0	0	0	0	0.45	0	0	0	0	0	6.43	4.95	6.94	0	0	0	0	0	0	1.11	0.35	0.19	0	0	0	0	0	0
gene-KI387_000228	bZIP	5.63	14.2	8.3	23.73	11.15	0.47	3.78	5.25	1.95	4.73	3.4	5.3	6.48	9.63	9.55	11.16	5.37	6.11	8.31	3.77	2.36	3.21	10.29	6.53	6.7	17.27	13.12	15.32	13.66	27.98	27.14	8.7	15.84	10.39	8.51	8.6	14.94	45.72	39.28	34.55	4.7	5.13	3.97	3.39	4.45	5.21
gene-KI387_000428	Trihelix	4.38	8.14	6.8	5	6.44	0.71	6.55	5.15	5.54	4.47	4.28	9.26	4.89	6.46	17.04	8.68	7.94	12.22	9.22	9.31	8.91	10.35	23.29	21.07	24.56	36.71	39.16	42.07	19.62	17.31	19.32	7.9	8.46	10.33	57	70.12	45.17	21.56	27.36	30.29	52.24	44	36.79	21.62	21.22	18.31
gene-KI387_000483	AP2/ERF-ERF	0	0	0	0	0	0	0	0	0	0	0	0.22	0	0	0	0.1	0	0	0	0	0	0	0.11	0	0.2	0	0	0	0.74	0.79	0.94	0	0	0	0	0.36	0.08	2.75	1.67	1.07	0.09	0	0	0	0	0
gene-KI387_000496	C3H	14.98	10.45	9.11	19.5	14.07	26.71	27.91	11.83	18.44	19.98	14.64	14.9	20.32	19.88	24.76	20.64	18.42	25.7	24.49	18.28	25.05	11.56	54.28	70.66	46.63	14.04	10.78	14.02	19.3	7.64	15.68	34.87	33.8	33.07	7.39	11.71	10.12	27.72	15.2	17.75	41.77	44.78	41.05	43.13	45.03	45.81
gene-KI387_000500	MYB	0	0	0	0	0	0	0	0	0	0	0	0	0	0	0	0	0	0	0.34	0	0	0	0	0	0	0	0	0	0	0	0	0	0	0	0	0	0	0	0	0	0	0	0	0	0	0
gene-KI387_000561	C2H2	2.26	17.83	6.36	4.67	0	0	0.06	0	0	0	0	0	0	0	0	0	0	0	0	0	0	0.04	0	0	0	16.44	17.91	20.08	2.69	4.31	3.38	0	0	0	18.25	18.42	22.3	1.72	3.49	3.18	0.2	0	0	0	0	0
gene-KI387_000606	E2F-DP	22.7	17.59	15.53	31.72	13.76	19.2	45.26	27.1	26.92	28.16	26.22	25.11	43.95	25.66	22.7	25.42	10.61	13.01	11.46	12.02	12.63	10.64	28.71	21.85	27.2	26.38	25.62	29.33	28.48	28.94	26.12	29.35	31.8	26.77	26.9	21.14	29.48	34.53	38.39	37.2	24.6	28.43	27.7	29.39	29.9	27.44
gene-KI387_000639	TCP	0	1.08	0	0.95	0	0	30.3	24.72	30.57	19.63	17.09	7.55	0	22.25	28.02	41.51	0	0	0	0	0	0	0	0	0	0	0	0	45.35	21.34	26.17	0	0	0	0	0	0	9.17	12.33	5.68	0	0	0	0	0	0
gene-KI387_000645	ULT	2.22	2.14	2.05	2.62	1.43	1.06	3.27	4.65	3.36	5.23	3.88	5.49	0.15	3.34	4.14	6.63	11.92	11.78	11.58	12.03	8.4	9.6	8.37	5.69	10.24	2.08	3.18	1.53	5.06	6.85	6.85	6.53	5.6	6.78	3.39	1.77	2.03	2.99	5.45	4.89	3.56	4.93	6.81	6.19	7.23	5.36
gene-KI387_000661	HB-HD-ZIP	0	0	0	0	0.09	0	0	0	0	0	0	0	0	0	0	0	0	0	0	0	0	0	1.12	0	0.24	0	0.73	0.19	0	0	3.85	0.21	0	0	0.92	0.15	0.5	0	2.98	0.3	0.29	0.26	0.2	0	0	0.4
gene-KI387_000711	Trihelix	4.54	11.21	8.25	4.12	13.25	15.21	3.21	1.77	6.98	2.4	7	9.5	0.64	3.54	16.94	7.09	61.64	68.74	59.59	48.81	49.97	48.47	76.72	76.79	71.74	16.09	15.78	16.94	55.57	46.68	47.18	69.36	67.98	72.69	12.91	11.83	7.88	22.05	19.67	19.68	67.66	53.3	54.34	71.87	73.39	66.26
gene-KI387_000806	GRAS	0.19	0.05	0.04	0	0.06	0.1	0.17	1.15	0.34	0.97	0.83	0.53	0.19	0.48	0.51	1	0.05	0.04	0.04	0.64	0.58	0.21	2.16	2.25	2.92	1.24	0.7	0.61	6.27	5.4	5.97	0.94	0.72	1.45	1.72	0.94	0.33	1.28	1.12	0.44	1.65	1.86	2.05	1.49	0.78	1.56
gene-KI387_000866	MYB-related	0	0	0	0	0	0	0	0	0	0	0	0	0	0	0	0	0	0	0	0	0	0	0	0	0	0	0	0	0	0	0	0	0	0	0	0	0	0	0	0	0	0	0	0	0	0
gene-KI387_000953	MYB	0	0.16	0	0.14	0.79	0.45	0	0	0	0	0	0	0	0	0	0	0	0	0	0	0	0	0.28	0	1.29	0.19	0	0	0.27	0	0	8.65	7.55	8.95	0	0	0	0	0	0	0	0	0	2.07	2.04	0.44
gene-KI387_000955	MYB	0	0	0	0	0.4	0	0	0	0	0	0	0	0	0	0	0	0	0	0	0	0	0	117.27	113.71	110.09	42.54	28.08	9.5	127.03	104.32	77.92	20.36	26.26	47.52	1.32	6.1	5.37	11.04	11.32	14.14	38.18	29.98	20.33	266.51	194.33	197.56
gene-KI387_001036	WRKY	9.96	13.01	10.42	17.06	22.33	31.87	29.69	32.93	28.98	33.41	25.18	38.82	30.81	41.15	43.79	36.82	19.09	20.32	19.83	20.31	20.42	16.57	20.13	19.06	22.11	17.11	16.2	20.56	18.91	15.23	17.47	20.12	21.46	22.53	19.82	18.39	15.87	15.48	16.56	20.19	23.76	27.82	28.22	20.94	23.42	19.29
gene-KI387_001125	bHLH	1.77	2.1	1.79	3.75	0.32	0	0	0	0	0	0	0	0	0	0	0	0	0	0	0	0	0	4.43	4.35	4.35	6	4.42	6.39	13.22	8.08	11.21	2.55	2.88	1.94	4.87	5.04	2.11	5.61	4.96	4.18	1.52	0.35	0.93	1.85	2.91	2.46
gene-KI387_001170	LFY	0	0	0	0	0	0	0	0	0	0	0	0.13	0	0	0	0	0	0	0	0	0	0	0	0	0	0	0	0	117.6	131.71	139	0	0	0	0	0	0.1	44.42	54.34	48.55	0	0	0	0	0	0
gene-KI387_001176	AP2/ERF-ERF	1.9	0.78	2.89	9.66	5.6	21.67	48.4	200.19	89.72	160.39	133.01	159.36	194.29	210.1	217.25	158.55	7.69	7.68	4.73	16.11	12.19	5.58	1.36	0.38	0.43	2.03	4.25	7.97	0	0.17	0	2.44	4.19	3.5	1.47	1.34	6.94	0.9	1.42	0.76	2.38	3.21	1.23	5.29	4.37	6.68
gene-KI387_001181	AP2/ERF-ERF	6.01	1.62	0.2	8.83	37.67	6.39	31.09	46.7	33.1	53.55	38.07	56.08	32.87	45.11	59.89	53.18	47.05	39.61	32.86	34.22	30.31	42.54	9.05	11.67	12.62	0.87	0.31	0.31	0.42	1.24	0.31	17.13	26.89	21.5	1.37	0.72	0.31	0	0	0	1.35	6.31	6.46	11.06	11.66	6.38
gene-KI387_001182	AP2/ERF-ERF	12.4	3.08	0.59	18.78	58.92	2.52	24.47	26.1	28.96	27.09	32.05	34.92	28.51	30.6	46.71	32.58	11.23	12.98	15.84	15.69	15.63	16.75	6.76	6.91	6.23	0.47	0.12	0.12	0.67	0.38	0.25	41.89	38.04	45.44	1.1	0.29	0.37	0.34	0	0	2.61	1.73	2.5	13.94	14.82	15.16
gene-KI387_001185	AP2/ERF-ERF	0.13	0	0	0.11	0.32	0	0	1.01	0	1.93	0.16	0.48	0.44	1.5	0.16	0.63	0	0	0	0	0	0	0.89	1.32	1.88	0.46	0	0.65	0	0.66	0	11.44	13.78	10.48	0.54	0.75	0.32	0.88	0	0	1.98	2.26	2.24	5.19	8.42	9.41
gene-KI387_001187	AP2/ERF-ERF	0.28	0.27	0	0.24	9.54	13.03	23.56	40.67	35.93	52.07	16.09	49.81	20.86	62.1	25.51	59.32	20.36	18.21	20.58	34.24	31.18	38.01	1.85	7.94	5.21	0.7	0	0	0	0	0	17.14	9.36	15.25	0	0	0.38	0	0	0	3.66	4.02	4.64	12.09	10.27	15.2
gene-KI387_001191	AP2/ERF-ERF	0	0.29	0.08	0.43	24.87	3.3	0.25	16.14	1.8	20.22	3.04	12.72	0.21	5.01	10.4	14.88	12.6	13.55	13.84	39.54	37	33.99	1.15	0.56	1.24	0.11	0	0.24	0	0.12	0	3.28	3.83	3.73	0	0	0	0.49	0.52	0.56	1.07	2.52	2.17	5.74	6.47	6.97
gene-KI387_001195	AP2/ERF-ERF	1.88	6.68	1.38	6.75	41.75	18.21	9.97	28.49	14.29	20.23	23.22	36.15	20.45	33.51	27.21	37.91	28.05	33.33	29.18	25.61	24.16	24.33	14.94	19.21	15.95	1.33	1.4	3.76	0.32	0.95	0.95	55.62	59.08	59.01	2.09	0.55	3.55	0.32	0.75	1.08	14.22	23.89	15.07	35.04	40.4	42.73
gene-KI387_001293	AP2/ERF-ERF	0	0	0	0	0	0	0	0	0	0	0	0	0	0	0	0	0	0	0	0	0	0	0	0	0	0	0	0	0	0	0	0	0	0	0	0	0	0	0	0	0	0	0	0	0	0
gene-KI387_001303	Trihelix	25.47	29.87	16.8	18.47	19.42	23.42	31.09	25.08	22.14	24.78	25.35	29.38	33.79	31.69	36.09	30.03	29.57	28.94	24.75	25.68	26.04	40.63	28.92	29.97	34.98	48.98	56.76	51.52	52.88	57.88	54.13	30.87	28.26	31.37	43.94	43.34	44.94	91.93	87.8	87.34	32.96	35.06	29.96	18.73	21.54	22.94
gene-KI387_001316	B3-ARF	3.71	4.55	3.03	4.24	2.88	3.71	4.48	7.2	4.48	5.89	2.04	9.61	3.7	8.05	6.99	9.83	9.62	12.79	11.16	10.58	9.72	5.64	9.62	7.88	9.9	7.6	7.96	10.38	11.07	11.9	11.29	15.05	12.64	15.82	11.07	7.83	10.67	9.98	8.82	10.34	17.27	16.09	13.65	12.18	10.22	14.19
gene-KI387_001399	WRKY	106.13	41.75	34.39	69.07	71.61	82.23	141.95	179.56	181.98	178.1	201.41	162.64	130.85	124.05	80.94	164.55	37.49	44.82	47.15	59.8	53.63	48.5	147.71	155.06	166.42	136.12	112.84	104.98	118.53	86.87	100.15	94.64	88.37	94.46	176.64	248.01	146.74	31.74	34.29	36.38	133	151.63	130.93	132.74	145.62	132.6
gene-KI387_001400	WRKY	63.81	17.21	25.56	46.39	37.03	27.91	66.27	102.29	112.97	136.47	135.37	90.01	71.44	58.38	38.76	89.86	14.56	15.5	13.03	14.75	17.88	14.22	259.13	250.2	272.82	45.78	48.6	45.94	51.99	33.43	34.43	172.07	162.41	167.22	86.56	114.42	63.12	25.64	24.61	33.03	287.59	300.48	272.21	347.43	395.33	370.83
gene-KI387_001404	B3-ARF	58.84	55.49	44.17	46.97	0.66	0.65	0.64	1.87	1.31	1.85	0.85	3.24	0.67	1.75	2.94	3.35	10.71	12.27	11.26	5.75	4.23	3.44	41.98	42.54	41.24	67.03	58.93	76.14	48.83	45.32	50.44	42.08	41.28	46.06	77.97	91.64	65.16	94.66	84.71	101.9	41.26	45.34	41.57	50.86	50.19	43.73
gene-KI387_001416	MADS-M-type	17.08	7.72	9.22	8.76	15.54	33.95	50.25	18.47	22.69	17.38	13.21	23.66	18.67	15.74	31.88	28.06	14.78	12.57	15.9	11.98	14.43	12.88	26.04	29.14	28.72	94.09	20.31	27.11	25.16	62.55	25.72	17.65	22.47	23.04	9.09	8.54	12.07	47.59	69.61	17.4	31.09	23.12	34.1	29.02	26.48	30.88
gene-KI387_001422	Tify	102.51	59.8	31.39	140.28	35.29	5.41	565.49	357.57	1090.38	595.74	821.29	331.78	244.77	140.39	202.06	357.48	56.84	45.24	45.42	57.17	51.34	48.68	962.75	972.81	968.54	196.45	214.27	108.84	750.31	616	636.66	350.54	319.1	329.54	388.33	501.79	253.8	106.03	118.67	90.42	856.56	955.44	958.28	662.27	722.34	758.6
gene-KI387_001424	TUB	26.48	49.99	37.31	28.46	24.38	38.77	32.97	54.74	43.15	52.66	46.12	63.01	27.63	51.04	73.48	57.68	41.46	42.78	40.69	41.92	39.05	30.66	127.23	139.81	129.05	78.82	79.81	81.02	82.74	77.34	77.77	205.74	214.9	214.24	79.56	70.39	71.17	105.89	100.44	95.44	160.67	195.05	195.71	311.08	302.43	291.61
gene-KI387_001430	Tify	339.12	149.75	85.82	831.07	88.42	34.27	584.57	218.19	661.16	270.54	703.19	124.44	475.39	160.68	151.12	124.96	13.35	7.76	6.75	29.72	27.97	23.98	976.21	932.22	938.63	120.69	122.83	64.39	353.58	262.24	244.6	574.07	537.6	507.24	116.95	154.47	76.53	106.04	99.67	110.6	622.99	859.05	815.7	682.03	711.86	762.78
gene-KI387_001431	B3	0	0	0	0	0.1	0	26.1	22.6	38.83	24.23	33.48	25.18	33.21	21.74	41.47	19.39	2.22	1.03	1.69	4.03	3.37	2.49	1.08	0.58	0.26	0	0	0	0.67	0	0	0.11	0	0	0	0	0	1.89	0.21	0.23	0.22	0.28	0.74	0	0	0.11
gene-KI387_001433	bHLH	0	0	0	0	0	0	0	0	0	0	0	0	0	0	0	0	0.86	0.7	0	2.25	1.23	0.63	5.7	7.54	12.98	0	0	0	57.6	36.98	32.55	0	6.67	0	0	0	0	22.92	11.03	14.68	0	2.13	1.73	2.27	0	0
gene-KI387_001441	C2C2-CO-like	20.02	15.99	17.54	10.43	26.06	27.49	26.44	30.77	21.86	30.8	19.29	35.01	23.59	27.91	23.74	33.42	30.48	31.74	29.43	16.61	16.19	16.01	50.1	54.42	51.55	53.2	51.89	48.99	54.8	48.35	49.66	54.34	54.56	54.79	47.47	47.82	51.71	48.91	55.88	58.06	46.27	63.53	61.87	73.47	53.8	62.41
gene-KI387_001466	NF-X1	0	0	0	0	0	0	0	0	0	0	0	0	0	0	0	0	0	0	0	0	0	0	0	0	0	0	0	0	0	0	0	0	0	0	0	0	0	0	0	0	0	0	0	0	0	0
gene-KI387_001484	NAC	240.55	149.53	124.98	173.96	67.81	6.64	160.39	149.64	219.87	162.4	276.47	101.32	101.94	84.4	80.95	98.31	38.57	30.84	34.98	35.98	39.76	35.78	230.41	221.41	248.84	50.54	88.39	69.36	70.81	56.04	50.43	444.85	448.29	470.99	159.08	198.72	83.07	32.38	31.99	43.82	141.46	235.48	215.19	446.05	452.57	490.89
gene-KI387_001485	AP2/ERF-ERF	0.93	0.45	0.76	0.6	0	0	0	0	0	0	0	0	0	0	0	0	0	0	0	0	0	0	0.42	0.34	0.38	3.1	3.87	1.79	21.46	17.16	15.51	9.14	13.67	13.08	2.98	1.4	5.46	8.87	2.87	3.45	1.64	0	0	12.77	5.18	9.75
gene-KI387_001492	AP2/ERF-ERF	0	0	0	0	0.4	1.66	7.9	4.16	9.84	6.93	24.33	9.29	1.52	3.56	4.12	10.25	0.48	0.19	0.68	8.93	10.34	8.73	0	0	0	1.19	1.72	1.95	0	0.1	0.1	0	0	0	2.06	1.56	0.58	0	0.31	0	0.11	0.54	0	0	0	0
gene-KI387_001559	BES1	0	0	0	0	0	0	0	0	0	0	0	0	0	0	0	0	0	0	0	0	0	0	0	0	0	0	0	0	0	0	0	0	0	0	0	0	0	0	0	0	0	0	0	0	0	0
gene-KI387_001581	MYB	0	0	0	0	0	0	0	0	0	0	0	0	0	0	0	0	0	0	0	0	0	0	0	0	0	0	0	0	0	0	0	0	0	0	0	0	0	0	0	0.15	0	0	0	0	0	0
gene-KI387_001611	TCP	0	0	0	0	0	0	0	0	0	0	0	0	0	0	0	0	0	0	0	0	0	0	0	0	0	0	0	0	0	0	0	0.3	0	0	0	0	0	0	0	0	0	0	0	0	0	0
gene-KI387_001628	HB-BELL	38.21	89.65	34.79	65.05	16.2	23.35	24.34	21.89	24.51	29.29	34.3	33.51	24.78	29.65	49.61	33.96	23.29	27.73	22.16	24.04	26.97	21.9	33.02	32.26	34.92	34.61	37.22	35.86	70.06	68.2	72.23	42.25	45.39	44.39	37.36	35.24	36.61	43.88	42.52	44.65	15.35	25.88	23.66	39.57	37.79	36.82
gene-KI387_001644	GRF	0	0	0	0	0	0	0	0	0	0	0	0	0	0	0	0	0	0	0	0.12	0.03	0.03	0.29	0.19	0.14	0.05	0.26	0	46.11	43.4	46.98	0.12	0	0.06	0.12	0.12	0	79.8	74.88	84.16	0.06	0	0.4	0.12	0	0
gene-KI387_001733	bHLH	0	0	0	0	0	0	0	0	0	0	0	0	0	0	0	0	0	0	0	0	0	0.13	0	0	0	0	0	0	0	0	0.24	0	0	0	0	0	0	0	0.38	0.27	0	0	0	0	0	0
gene-KI387_001747	HB-HD-ZIP	5.66	25.08	2.32	0.42	1.34	2.31	1.42	0.73	0.97	4.39	3.08	3.25	0.4	2.05	3.28	4.6	18.86	20.41	20.86	12.22	12.38	17.4	9.57	7.6	9.39	4.35	2.35	3.29	31.3	28.43	28.42	2.7	2.29	3.47	10.6	5.85	7.27	33.57	37.21	37.26	11.85	13.24	13.24	4.58	5.14	5.04
gene-KI387_001765	Tify	44.15	97.9	46.26	38.48	7.83	0	17.41	1.5	76.38	1.27	35.43	5.73	2.51	1.23	18.98	4.5	6.09	9.81	7.05	2.7	2.71	4.09	63.66	61.68	62.99	47.78	66.2	54.05	66.39	55.2	56.4	31.98	27.13	31.77	89	88.19	60.94	31.94	44.03	39.56	44.2	47.21	50.49	28.14	27.74	26.05
gene-KI387_001795	WRKY	65.38	12.17	45.19	22.45	46.22	115.13	109.24	153.16	164.46	197.66	140.03	208.91	102.5	108.91	70.11	197.48	16.36	14.4	14.24	27.77	23.53	20.37	98.46	95.72	97.63	101.66	109.66	97.48	149.08	106.96	125.12	56.02	53.27	58.63	238.04	266.92	156.98	36.7	42.94	41.98	105	146.92	134.4	70.79	68.75	72.28
gene-KI387_002110	MYB-related	10.14	45.38	20.31	26.71	64.76	0	0	2.58	3.31	10.11	2.83	13.7	2.77	3.52	5.62	8.34	19.11	16.67	11.77	5.51	10.58	8.35	2.09	0.79	0	46.43	52.56	73.21	49.91	69.57	61.16	4.01	3.3	1.64	69.64	42.35	77.79	38.66	77.85	98.32	6.11	1.85	7.22	4.25	4.42	4.59
gene-KI387_002125	LOB	0	0	0	0	0	0	0	0	0	0	0	0	0	0	0	0	0	0	0	0	0	0	0	0	0	0	0	0	0	0	0	0	0	0	0	0	0	0	0	0	0	0	0	0	0	0
gene-KI387_002134	MYB-related	0	0.17	0	0	0	0	0	0	0.48	0	0.44	0.32	0	0	0	0	0	0.13	0.16	0	0	0	4.72	3.95	4.12	0.2	0.21	1.07	8.7	12.94	11.7	0	0	0.48	1.43	0.75	0.21	1.45	0.69	0.25	1.18	0.29	0.45	0	0.22	0
gene-KI387_002135	MYB-related	0	0	0	0	0	0	0	0	0	0	0	0	0	0	0	0	0	0	0	0	0	0	9.67	11.03	0	0	0	0	142.91	170.09	137.68	12.4	7.61	0	0	0	0	27.37	28.05	19.81	0	0	0	0	0	0
gene-KI387_002179	MADS-MIKC	3.16	9.56	3.23	3.91	2.52	0	0	0	0	0	0	0	0	0	0	0	0	0	0	0	0	0	0	0	0	1.8	2.84	1.91	10.67	11.78	7.98	2.97	3.7	3.46	1.85	1.94	0.72	9.68	10.2	7.71	0	0	0	1.37	2.43	1.82
gene-KI387_002182	MADS-MIKC	23.51	28.08	21.8	25.58	13.56	0.79	0	0	0	0	0.25	0	0.23	0	0	0	0	0	0	0	0	0	0	0	0	12.15	17.98	21.49	43.64	41.84	41.11	51.61	53.14	39.96	28.08	23.06	22.81	22.26	23.79	26.16	0	0	0	29.57	25.97	29.61
gene-KI387_002185	MADS-M-type	61.86	111.74	57.94	67.15	36.14	16.86	7.29	0	7.28	0	0	0	0	0	8.05	0	0	0	0	0	0	0	0	0	0	36.1	109.1	62.48	246.11	259.67	201.5	177.3	213.77	185.77	61.69	68.38	126.53	139.94	127.32	88.1	0	0	0	134.36	124.04	113.94
gene-KI387_002187	MYB	4.19	33.36	28.4	88.14	0.31	0	12.29	8.18	35.65	6.68	61.29	13.71	3.18	5.49	13.49	11.73	0.25	0	0.58	0	0.09	0	1.05	0.18	1.19	1.74	4.86	4.64	3.13	2.33	2.8	2.97	3.9	3.08	8.06	2.49	3.53	0	0.83	2.84	0.68	0.21	1.3	2.98	2.97	2.86
gene-KI387_002190	MYB-related	29.28	111.34	57.92	95.59	17.94	0.51	5.46	4.55	9.35	11.36	11.27	35.48	3.97	3.38	45.45	28.98	16.46	11.65	14.32	39.49	42.56	15.75	2.9	4.03	1.79	0.95	3.7	2.1	1.26	1.65	0.48	7.4	11.36	5.99	3.64	2.99	1.64	0	1.75	0	0	1.28	0.74	18.72	15.42	16.51
gene-KI387_002194	MYB-related	0	0	0	0	0	0	0	0	5.8	0	0	0	0	0	0	0	0	0	0	0	0	0	0	0	3.24	0	0	0	0	0	0	3.03	0	0	0	0	0	0	0	0	0	0	0	0	0	0
gene-KI387_002196	MYB-related	0	0	0	0	0	0	0	0	0	0	0	0	0	0	0	0	0	0	0	0	0	0	0	0	0	0	0	0	0	0	0	0	0	0	0	0	0	0	0	0	0	0	0	0	0	0
gene-KI387_002197	MYB-related	1.43	2.72	2.26	7.17	0	0	0	0	0	0	6.27	0	0	0	0	0	0	0	0	2.34	0.96	1.91	0	0	0	3.36	0	0	4.67	3.41	19.12	0	0	0	11.14	0	4.18	0	0	0	0	0	0	9.18	7.47	0
gene-KI387_002244	AP2/ERF-ERF	0	0	0	0	0	0	0	0	0	0	0	0	0	0	0	0	0	0	0	0	0	0	0	0	0	0	0	0	0	0	0	0	0	0	0	0	0	0	0	0	0	0	0	0	0	0
gene-KI387_002245	bHLH	0	0	0	0	0	0	0	0	0	0	0	0	0	0	0	0	0	0	0	0	0	0	2.14	1.3	0.48	0	0	0	0	0	0.77	0.43	0.43	0	0	0	0	0	0	0	0.83	0	1.97	0	0	0
gene-KI387_002256	AP2/ERF-ERF	0	0.4	0	0	0.72	0.83	0	0	0	0	0	0	0	0	0	0	0	0	0	0	0	0	57.65	101.36	85.76	7.77	10.16	2.91	25.37	24.66	18.14	3.31	0.67	0	16.18	23.99	14.76	1.56	1.86	0	50.72	40.94	36.67	4.17	4.84	8.24
gene-KI387_002302	MADS-MIKC	0	0	0	0	5.22	164.14	9.71	4.47	9.28	7.96	9.81	14.91	4.01	5.13	18.98	15.43	22.97	54.57	96.95	0.14	0.23	0.12	0	0	0	0	0.2	0.41	2.23	1.25	0.83	0	0	0	0	0	0	245.94	229.36	238.26	0	0	0	0	0	0
gene-KI387_002318	MADS-MIKC	0	0	0	0	0	0	0	0	0	0	0	0	0	0	0	0	0	0	0	0	0	0	2.46	2.8	6.26	0	1.75	0	0	0.35	0	1.98	0	0.39	0.39	0	0	0	0	0	1.92	0.48	1.1	0.41	0.36	0.38
gene-KI387_002323	MADS-MIKC	0	0	0	0	0	0	0	0	0	0	0	0	0	0	0	0	0	0	0	0	0	0	2.14	1.28	2.56	0	0	0	0	0.22	0.67	0.25	0	0.25	0.25	0	0	208.1	218.95	191.25	1.46	0.3	1.4	0	0	0
gene-KI387_002360	MYB	85.28	83.5	33.36	22.02	0	0.29	0.7	0.7	1.86	0.65	0.37	0.69	1.19	0.54	0.19	0	0	0.19	0.38	0	0.17	0	74.22	81.41	73.1	251.25	201.66	190.59	286.71	285.59	227.29	14.74	14.2	13.72	202.45	243.56	233.91	745.53	959.45	1104.61	113.04	62.29	73.73	37.87	29.86	29.89
gene-KI387_002406	MYB-related	2.08	1.99	1.11	2.94	1.95	6.23	4.12	7.59	4.24	5.93	3.56	6.01	0	2.27	11.29	5.54	4.5	5.69	6.86	3.91	6.39	4.23	7.07	6.25	5.69	5.48	3.64	6.8	17.09	13.73	12.16	9.07	5.55	8.22	8.83	11.59	3.83	7.53	7.21	8.09	9.73	14.36	11.43	8.54	10.89	8.63
gene-KI387_002443	LOB	0	0	0	0	0	0	0	0	0	0	0	0	0	0	0	0	0	0	0	0	0	0	0	0	0	0	0	0	0	0	0	0	0	0	0	0	0	0	0	0	0	0	0	0	0	0
gene-KI387_002444	LOB	0	0	0.65	0	0	0	0	0.97	0	1.54	0	1.14	0	0.45	0	0	0	0	0	0	0	0	0	0	0	0	0	0	0	0	0	0	0	0	0	0	0.7	0	0	0	0	0	0	0	0	0
gene-KI387_002460	C3H	36.47	46.31	47.54	38.01	50.62	70.77	40.32	56.98	56.73	71.67	41.94	77.13	43.1	57.61	80.15	76.05	114.58	129.08	112.07	85.85	76.95	58.91	69.91	64.76	69.88	95.72	88.67	96.32	109.68	101.5	100.42	90.11	88.79	98.2	112.74	118.35	104	101.9	109.36	105.17	83.14	97.82	93.41	68.38	72.77	69.29
gene-KI387_002646	AP2/ERF-ERF	0	0.07	0	0	0	0	0	0	0	0	0	0	0	0	0	0	0	0	0	0	0	0	0	0	0	0	0	0	0	0	0	0	0	0	0	0	0	2.25	0.27	0.19	0	0	0	0	0	0
gene-KI387_002734	bHLH	0	0	0	0	0	0	0	0	0	0	0	0	0.35	0	0	0	0	0	0	0	0	0	0	0	0	0	0	0	0	0	0	0	0	0	0	0	0	0	0	0	0	0	0	0	0	0
gene-KI387_002835	LOB	3.27	0.94	1.59	0	0.38	0	0	0	0	0.53	0	1.57	0	0	0	0	0	0	0	0	0.44	0	24.36	23.96	29.6	23.28	20.84	10.96	4.17	7.07	7.66	38.81	34.34	38.42	16.07	20.37	12.25	2.36	2.8	1.53	13.42	10.02	9.57	14.4	23.92	18.13
gene-KI387_002840	LOB	0	0	0	0	0	0	0	0	0	0	0	0	0	0	0	0	0	0	0	0	0	0	0	0	0	0	0	0	0	0	0	0	0	0	0	0	0	0	0	0	0	0	0	0	0	0
gene-KI387_002842	LOB	0	0	0	0.22	0	0	0	0	0	0	0	0	0	0	0	0	0	0	0	0	0	0	0	0	0	0	0.68	0	0	0.34	0	0	0	0	0	0	0	0	0	0	0	0	0	0	0	0
gene-KI387_002846	LOB	3.67	0	0	0.47	0.44	0	0.25	0.3	1.05	0	0	0	0.43	0	0	0	0	0	0	0	0	0	10.45	15.84	8.52	4.75	1.59	3.21	43.16	34.43	26.94	39.72	36.79	34.52	8.91	11.2	11.98	4.03	3.92	6.35	21.69	17.96	16.88	53.61	49.19	65.15
gene-KI387_002849	LOB	110.01	482.62	68.47	131.91	0	0	0	0	0	0	0	0	0	0	0	0	0	0	0	0	0	0	0	0	0	2.09	1.16	1.08	4.46	1.09	2.32	4.95	1.32	0	7.24	5.52	4.86	1.44	3.45	2.57	0	0	0	2.71	3.46	2.36
gene-KI387_002852	LOB	24.01	22.9	15.43	19.26	15.7	123.7	14.92	20.71	23.76	30.95	22.94	23.29	22.95	14.26	14.45	23.42	16.54	13.6	11.87	13.4	13.45	12.77	72.33	81.01	64.88	75.54	57.93	51.99	58.15	37.03	39.07	71.45	71.35	86.81	80.82	98.61	54.84	41.66	40.17	35.5	132.4	93.86	92.48	106.16	99.13	84.86
gene-KI387_002853	LOB	0.8	2.29	1.62	5.77	0	0	6.15	0	8.72	0	2.75	0	2.64	0	0	0	0	0	0	0.65	0	0	9.65	3.77	6.34	3.17	1.7	0.56	10.57	10.07	5.18	3.15	1.28	1.92	1.85	2.01	1.75	3.73	7.09	11.01	0.6	0	0.57	0	0.58	0
gene-KI387_002854	LOB	0	0	0.27	0	0	0	0.57	0	2.95	0	0	0	0	0	0	0	0	0	0	0	0	0	1.27	1.01	2.27	1.69	1.35	1.33	12.68	17.48	7.77	3.03	1.52	0.51	4.44	3.18	1.84	9.58	7.59	12.41	0	0	0	0	0	0.48
gene-KI387_002863	LOB	0	0	2.74	0	0	0	0	0	0	0	0	0	0	0	0	0	0	0	0	0	0	0	0	0	0	7.09	8.07	9.52	0	7.25	0	0	0	0	2.65	12.99	5.79	3.12	10.05	11.58	0	0	0	0	0	0
gene-KI387_002864	LOB	0	0	0	0	0	0	0	0	0	0	0	0	0	0	0	0	0	0	0	0	0	0	0	0	0	0	0	4.82	0	0	0	0	0	0	0	0	0	6.23	0	0	0	0	0	0	0	0
gene-KI387_002868	LOB	0	0	0	0	0	0	0	0	0	0	0	0	0	0	0	0	0	0	0	0	0	0	0	0	0	0	0	0	0	0	0	0	0	0	0	0	0	0	0	0	0	0	0	0	0	0
gene-KI387_002869	LOB	0	0	0	0	0	0	0	0	0	0	0	0	0	0	0	0	0	0	0	0	0	0	0	0	0	0.66	0.71	0	0.94	0.69	1.44	2.35	0.81	1.6	4.59	0.84	3.69	0	2.2	0.81	0.75	0	0.71	4.98	0.72	3.74
gene-KI387_002875	LOB	0	0	0	0	0	0	0	0	0	0	0	0	0	0	0	0	0	0	0	0	0	0	0	0	0	0	0	0	0	0	0	0	0	0	0	0	0	0	0	0	0	0	0	0	0	0
gene-KI387_002877	LOB	1.33	18.98	0.87	1.37	0.32	0	0.42	3.94	2.58	4.68	7.24	7.55	0	0	2.46	7.27	0.26	0	0.24	0	0.18	0	157.7	174.1	152.18	46.99	136.53	44.84	263.95	210.45	217.88	13.39	14.04	9.01	360.34	591.06	244.55	23.9	40.42	34.22	380.06	300.92	270.8	132.76	114.56	124.78
gene-KI387_002878	LOB	0	152.1	0	0	0	0	0	0	0	0	0	0	0	0	0	0	0	0	0	0	0	0	0	0	0	0	0	0	0	0	0	0	0	0	0	0	0	0	0	0	0	0	0	0	0	0
gene-KI387_002879	LOB	0	0	0	0	0	0	0	0	0	0	0	0	0	0	0	0	0	0	0	0	0	0	0	0	0	0	0	0	0	0	0	0	0	0	0	0	0	0	0	0	0	0	0	0	0	0
gene-KI387_002934	GARP-ARR-B	1.46	14.76	12.78	0.47	0	0	0	0	0	0	0	0	0	0	0	0	0	0	0	0	0	0	0	0.06	0	29.62	26.86	37.38	16.83	19.66	21.23	0.97	0.87	1.23	53.73	36.06	45.66	9.65	11.39	16.05	0.06	0	0.11	1.08	0.81	0.99
gene-KI387_002962	LOB	0	0	0	2.89	0	0	0	0	0	0	0	0	0	0	0	0	0	0	0	0	0	0	0	0	0	0	0	0	0	0	0	0	0	0	0	0	0	0	0	0	0	0	0	0	15.66	0
gene-KI387_002964	LOB	0	0	0	0.93	0	0	0	0	0	0	0	0	0	0	0	0	0	0	0	0	0	0	2.15	1.13	5.08	0.47	0	0	33.24	18.11	19.06	7.93	5.14	5.14	3.33	1.2	0.52	0.67	5.32	1.16	4.36	6.67	8.79	43.03	38.69	34.74
gene-KI387_002965	LOB	0	0	0	0	0	0	0	0	0	0	0	0	0	0	0	0	0	0	0	0	0	0	0	0.97	0	0	0	0	1.74	4.73	2.19	0.48	0.97	0	0	0	0.44	0	0	0	0.47	0.57	0	9.49	8.34	6.96
gene-KI387_002970	LOB	0	0	0	0	0	0	0	0	0	0	0	0	0	0	0	0	0	0	0	0	0	0	0	0	0	0	0	0	0	0	0	4.36	0	5.04	0	0	0	0	0	0	0	4.36	7.39	15.65	16.91	8.22
gene-KI387_002974	C2C2-Dof	1.93	3.61	1.77	6.53	6.08	11.16	4.04	4.68	2.67	4.01	3.09	6.52	4.87	4.52	7.76	3.67	15.23	16.54	12.62	17.25	13.94	11.91	16.29	17.97	13.06	6.46	5.67	6.88	4.28	4.02	3.18	23.32	22.72	25.23	3.66	4.27	4.36	4.1	4.12	4.74	16.38	10.68	10.75	28.85	28.63	32.33
gene-KI387_003007	WRKY	8.99	1.26	1.38	7.86	49.77	133.87	73.24	81.54	64.51	90.65	58.36	46.14	62.05	58.62	21.6	46.77	9.27	4.14	5.48	16.93	16.62	11	17.17	16.73	19.52	4.86	1.63	2.58	0.64	0.24	0	7.96	9.61	7.59	2.6	2.18	1.89	1.27	1.25	0.54	14.7	17.71	17.01	9.68	11.44	13.78
gene-KI387_003010	WRKY	0.39	0	0	0	7.75	7.32	1.94	10.1	2.26	23.52	1.56	6.56	9.62	8.27	0.25	4.5	0.11	0.09	0.1	0.43	0.31	0.45	5.28	4.78	4.7	0.06	0	0	0	0	0	0.75	0.86	0.87	0.22	0.38	0.07	0.18	0	0.08	7.48	13.64	11.62	0.45	0.73	1.01
gene-KI387_003025	C2H2	0	0.77	1.84	0	0.19	0	0	0	0	0	0	0	0	0	0.21	0.26	0	0	0	0	0	0	0	0.46	0	0.75	0.98	1.99	0.81	1	1.61	0.67	0.44	2.34	1.76	0.92	0.6	0	0	0.92	0	1.1	0.21	0.91	0.6	0.43
gene-KI387_003034	C2H2	1	3.85	1.31	0.69	0.84	0	0	0	0	0	0	0	0	0	0	0	0	0	0	0	0	0.14	2.1	1.74	2.58	2.85	2.25	3.28	5.81	7.62	8.18	13.99	12.87	16.63	5.88	4.7	1.52	3.41	1.62	1.75	1.11	2.42	2.65	0.29	2.57	2.2
gene-KI387_003041	C2H2	0.36	2.28	0.22	0.16	0.06	0	0	0	0	0	0	0	0	0	0	0	0	0	0	0.08	0	0	1.03	0	0.28	0.61	0.53	1.31	0.29	0.44	0.76	0.37	0.59	0.41	1.21	1.75	0.97	1.18	1.4	1	0.36	1.36	0.23	0	0	0.36
gene-KI387_003046	C3H	24.87	16.3	21.81	21.12	22.26	29.54	11.2	13.71	11.4	9.72	8.35	13.23	15	11.17	17.97	12.39	12.19	11.88	11.06	10.5	8.69	5.68	25.38	20.97	25.05	27.12	21.68	25.88	20.59	17.6	18.39	27.72	20.91	27.45	23.42	27.08	25.58	17.75	20.21	17.48	22.75	24.19	25.77	17.83	18.19	16.59
gene-KI387_003048	bZIP	4.36	12.84	4.44	9.08	12.31	16.3	7.96	7.83	12.7	13.26	12.74	17.17	12.96	15.24	17.22	16.23	8.41	9.52	10.04	11.63	9.69	8.79	6.73	8.51	6.93	6.08	7.33	5.97	7.45	6.93	9.29	9.53	8.3	9.47	7.12	5.55	6.12	8.27	11.53	11.01	3.73	4.44	4.82	6.79	5.88	6.5
gene-KI387_003060	C3H	4.36	8.77	7.51	4.52	11.85	22.36	10.19	13.38	13.4	14.71	8.24	19.86	11.65	17.34	22.04	17.19	19.46	19.19	18.81	17.48	14.92	12.13	12.23	11.43	10.2	9.14	10.4	10	9.94	10.32	11.78	10.58	11.61	12.8	11.99	13.49	11.5	12.19	11.92	11.29	10.98	10.22	9.13	8.29	9.59	7.94
gene-KI387_003103	Tify	0	0	0	0	56.02	45.21	161.89	87.4	368.98	91.99	258.33	44.63	71.06	47.12	110.93	45.2	22.42	7.07	6.58	5.71	8.08	7.87	69.57	71.04	79.97	0	0.24	0	0.96	0.48	1.2	0.54	1.84	0	0	0	0.24	9.31	9.39	8.77	23.76	35.21	30.69	0	0.48	0.26
gene-KI387_003104	Tify	0	0	0	0	106.62	13.35	34.72	32.83	47.49	64.77	70	63.99	29.17	24.71	61.71	51.01	0	0.34	0.41	0	0.3	0	4.71	4.34	7.32	0	0	0	0	0	0	0	0	0	0	0	0	0	0	0	1.4	0	0.66	0	0	0
gene-KI387_003105	Tify	25.99	0	42.54	0	78.75	37.44	615.01	370.74	1417.34	233.49	1033.2	183.29	424.28	132.49	258.96	181.61	72.13	32.57	36.92	36.75	36	37.78	2.84	1.47	0.78	0	0.43	0.86	0	0	0	0	0	0	0	3.92	5.85	0	0	0	1.41	1.16	2.03	0	0	0
gene-KI387_003106	Tify	16.6	1.59	25.39	0	163.42	6.5	381.5	191.47	677.68	114.65	418.89	83.74	165.28	63.68	77.83	85.27	21.69	11.53	10.4	7.86	10.39	15.57	4.67	1.52	3.16	0	0.9	0.89	0	0	0	0	0	0.51	0.49	3.9	3.15	0	0	0	0	1.8	2.53	0	0	0
gene-KI387_003109	Tify	0.33	0	0.8	0	1.94	0	107.75	20.66	345.51	9.99	237.56	14.13	34.55	4.28	20.81	12.01	29.68	16.8	11.58	17.82	18.69	19.61	0	0	0	0	0	0	0	0	0	0	0	0	0	0	0	0	0	0	0	0	0	0	0	0
gene-KI387_003129	HB-WOX	0	0	0	0	0	0	0	0	0	0	0	0	0	0	0	0	0	0	0	0	0	0	0	0	0	0	0	0	0	0	0	0	0	0	0	0	0	0	0	0	0	0	0	0	0	0
gene-KI387_003130	HB-WOX	0	0	0	0	0	0	0	0	0	0	0	0	0	0	0	0	0	0	0	0	0	0	0	0	0	0	0	0	5.15	5.25	3.42	0	0	0	0	0	0	0.64	0	0	0	0	0	0	0	0
gene-KI387_003213	C2H2	0.56	1.53	1.1	0.91	2.8	6.72	2.52	3.14	2.34	2.59	0.23	3.61	4.35	4.29	3.29	2.3	2.64	2.6	2.98	3.8	2.36	2.26	2.98	3.63	3.28	3.35	3.51	2.79	3.33	3.64	3.94	4.5	5.42	6.12	3.28	4.16	3.7	3.01	3.69	3.76	4.68	4.72	4.32	4.28	3.92	3.8
gene-KI387_003246	SBP	0.89	7.49	2.46	2.86	2.1	0.31	0.42	0.49	0.87	1.17	1.18	2.51	0.48	0.3	2.66	1.53	3.48	2.3	2.04	4.78	3.94	3.46	0.55	0.78	1.38	2.9	3.16	4.17	29.07	24.09	23.78	1.22	1.18	2.67	8.94	5.25	3.33	15.47	14.66	12.82	0	0.37	1.42	4.11	4.75	3.22
gene-KI387_003276	bHLH	6.29	10.67	6.17	3.63	9.49	0.85	7.5	3.36	7.44	3.44	5.27	4.32	3.98	5.58	9.93	3.69	12.92	13.72	9.83	11.7	8.87	6.5	6.99	7.51	7.53	10.64	13.85	14.84	19.92	19.38	23.84	5.99	9.29	8.47	43.13	35.88	24.59	9.18	13.54	13.53	8.09	7.56	7.61	5.56	6.75	5.95
gene-KI387_003326	LOB	0	0	0	0	2.44	0	0	0	0	0.51	0.49	0.76	0	0	0	0	0	0	0	0	0	0	0	0	0	0	0	0	0	0	0	0	0	0	0	0	0	0	0	0	0	0	0	0	0.88	0
gene-KI387_003328	LOB	0	0	0	0	6.73	0	0	0	0	0	0	0	0	0	0	0	0	0	0	0	0	0	0	0	0	0	0	0	0	0	0	0	0	0	0	0	0	0	0	0	0	0	0	0	0	0
gene-KI387_003337	LOB	0	0	0	0	0.26	0	0	0	0	0	0.86	0	0.83	0	0	0	0	0	0.41	0	0.61	0	1.93	2.21	0	0	0	0	0	0	0	2.24	1.53	2.28	0	0	0	0	0	0	0	0	2.7	0	0	1.43
gene-KI387_003341	LOB	0	0	0	0	0	0	0	0	0	0	0	0	0	0	0	0	0	0	0	0	0	0	0	0	0	0	0	0	0	0	0	0	0	0	0	0	0	0	0	0	0	0	0	0	0	0
gene-KI387_003351	LOB	0	0	0	1.17	0	0	0	0	0	0	0	0	0	0	0	0	0	0	0	0	0	0	1.32	2.63	2.35	0	0	0.46	0	0.47	0	13.64	19.99	8.43	0	0	0	0	0	0	0	0	0.96	8.16	7.62	4.02
gene-KI387_003356	LOB	8.37	7.97	19.89	10.03	9.86	0.75	5.51	0	0	0	4.66	0	0	0	0	0	37.67	14.56	20.97	1.93	0	3.2	68.88	96.89	115.28	0	2.86	2.54	0	0	0	285.04	369.17	268	2.81	3.46	0	0	0	0	68.8	78.12	62.19	251.47	187.23	239.38
gene-KI387_003362	LOB	0.75	2.9	0	2.79	11.97	26.53	1.54	1.36	3.56	3.23	14.41	10.66	0.98	5.01	8.65	13.33	27.85	30.72	29.32	10.46	8.13	10.53	287.73	304.13	310.22	3.37	6.49	1.95	17.17	9.81	13.57	285.88	243.1	242.22	7.21	11.83	12.56	0.44	0.69	0.38	264.52	223.48	258.05	488.42	527.74	584.28
gene-KI387_003367	WRKY	5.25	3.18	36.12	3.34	0	1.66	1.8	2.32	7.17	7.03	7.39	8.5	0.34	0	3.42	4.86	0	0.11	0	1.89	2.45	3.35	2.28	1.49	0.95	6.08	25.85	23.82	6.75	4.28	2.24	1.25	1.83	0.61	11.27	16.23	10.51	4.5	6.71	6.38	1.63	2.04	3.7	2.1	2.06	2.41
gene-KI387_003371	WRKY	0	0	0	0	0	0	0	0	0	0	0	0	0	0	0	0	0	0	0	0	0	0	0	0	0	0	0	0	0	0	0	0	0	0	0	0	0	0	0	0	0	0	0	0	0	0
gene-KI387_003374	WRKY	33.44	5.73	49.3	2.49	0	0	0	0	0	0	19.77	0	0	0	0	0	0	0	0	0	0	0	41.58	0	13.32	82.99	53.91	80.1	317.58	278.7	255.17	0	0	0	132.98	145.8	58.53	139.78	162.79	96.66	21.94	85.7	121.28	0	25.26	12.04
gene-KI387_003376	WRKY	68.76	30.49	152.98	31.41	0.29	0	2.38	2.89	13.5	7.9	2.09	3.4	2.06	1.31	3.79	3.12	1.45	0.77	0	3.34	2.04	3.89	1.13	1.7	0	90.26	228.18	123.16	19.71	27.6	15.97	0	0	0	149.61	173.71	139.66	18.31	13.74	8.94	5.76	4.96	4.67	2.77	0.8	0.83
gene-KI387_003389	WRKY	0.68	2.95	3.76	30.44	1.85	0.12	0	0.81	0	0.65	0	0.96	0	0.5	0	0.28	0	0	0	0	0	0	9.6	7.3	6.77	0.4	0	0.21	0	0	0	1.91	5.13	4.23	0.23	0	0	0	0	0	0.7	1.16	1.33	0.72	0.64	0.46
gene-KI387_003408	WRKY	0	0	5.63	0	0	0	0	0	0	0	0	0	0	0	0	0	0	0	0	0	0	0	0	0	0	0	0	0	0	0	0	0	0	0	0	0	0	0	0	0	0	0	0	0	0	0
gene-KI387_003424	MYB-related	0.46	1.1	4.29	1.57	0	0	5.42	0.4	5.92	0.32	8.7	0.94	0.29	0.37	0	1.25	0	0	0	0	0	0	28.5	28.5	28.4	4.14	18.64	9.94	51.49	34.75	33.89	1.99	0.98	0.98	18.17	18.14	6.22	4.34	8.11	9.8	9.3	7.98	8.88	1.69	0.89	2.86
gene-KI387_003498	Tify	54.07	120.86	65.33	59.09	69.23	86.86	66.88	58	86.57	53.89	61.57	67.59	72.36	53.86	77.07	58.04	70.47	79.55	73.85	41.23	42.78	37.88	251.09	253.05	262.27	59.47	97.65	95.87	113.35	116.39	114.74	201.74	197.92	193.09	90.03	81.62	66.77	100.41	97.66	114.16	88.39	141.14	121.27	139.18	130.94	127.31
gene-KI387_003517	C3H	31.52	78.52	63.59	42.18	47.64	46.04	39.39	45.92	49.97	56.14	61.01	63.09	28.59	66.87	76.48	62.76	60.76	74.99	69.14	70.06	62.52	50.66	46.33	43.38	48.18	32.89	33.82	40.87	49.13	44.3	47.38	66.32	67.5	70.85	50.99	49.59	40.07	31.58	33.26	30.39	31.65	50.58	44.76	85.03	91.33	78.51
gene-KI387_003604	C2C2-YABBY	29.79	72.23	62.67	18.89	0	0	0	0	0	0	0	0	0	0	0	0	0.28	0	0	0	0	0	0	0	0	68.2	71.32	90.34	119.95	99.66	105.67	0	0	0	76.09	76.09	95.21	32.53	46.93	55.56	0	0	0	0	0	0
gene-KI387_003625	AP2/ERF-AP2	6.67	14.61	9.23	20	9.93	0.04	0.62	2.64	3.87	2.29	13.08	10.14	2.97	5	16.23	8.19	17.31	19.72	17.87	11.13	13.82	11.09	9.64	8.24	10.16	32.34	24.11	34.75	12.42	15.1	15.81	29.42	29.31	29.93	38.33	32.3	29.26	20.01	19.56	23.49	2.11	3.97	3.93	13.05	13.54	13.3
gene-KI387_003668	NF-YB	0	0	0	1.33	5.32	18.18	0	0	0	0	0	0	0	0	0	0	4.48	0	4.55	1.31	2.15	3.2	0	0	0	0	0	0	0	0	0	0	0	5.32	0	0	0	0	0	0	8.17	0	0	0	0	0
gene-KI387_003669	NAC	1.81	1.65	1.17	1.8	12.66	30.19	35.1	29.28	67.89	41.67	113.68	49.97	20.43	37.35	34.67	45.7	10.55	13.94	9.01	18.9	20.72	10.76	5.27	5.82	4.99	1.39	0.34	1.03	0.93	0.12	1.15	0.39	0	0.25	0.89	1.18	1.47	0.46	0.98	0.39	10.46	10	11.84	0.9	1.5	1.24
gene-KI387_003799	B3	2.1	8.22	6.08	2.04	2.54	4.08	4.41	4.06	3.21	1.19	3.58	4.29	2.95	3.38	5.41	3.57	8.33	9.63	12.7	6.83	5.9	5.45	70.39	76.62	74.33	47.73	34.28	41.67	72.37	60.79	66.22	28.12	31.08	34.6	42.23	39.4	39.12	71.02	71.31	85.44	99.54	113.98	96.19	46.65	34.56	31.91
gene-KI387_003859	GARP-ARR-B	12.3	41.01	31.53	29.97	6.92	0.13	0.16	1.75	0.32	2.91	0.15	2.29	0.57	2.82	0.68	2.27	8.8	11.21	6.11	1.56	1.07	1.41	3.61	1.96	3.04	4.38	7.01	8.26	20.1	18.48	18.35	1.78	2.62	2.25	8.46	7.31	9.53	35.96	30.34	44.28	0.64	3.16	0.84	4.25	4.18	3.03
gene-KI387_003873	WRKY	40.58	17.66	7.67	29.74	36.22	49.61	41.45	88.38	60.35	85.14	67.87	97.81	36.36	76.33	54.11	94.92	33.9	34.57	38	47.83	42.3	44.5	246.19	258.2	261.32	49.06	42.21	27.32	103.65	67.71	71.52	169.71	150.67	158.37	73.91	93.35	52.93	18.91	16.23	18.32	414.65	436.09	392	241.13	278.61	258.5
gene-KI387_003999	GRAS	0	0	0	0	0	0	0	0	0	0	0	0	0	0	0	0	0	0	0	0	0	0	0	0	0	0	0	0	0	0	0	0	0	0	0	0	0	0	0	0	0	0	0	0	0	0
gene-KI387_004091	bHLH	0	0.13	0	0	0	0	0	0	0	0.24	0	0	0	0	0	0.62	0	0	0	0	0	0	0	0	0	0	0	0	0	0	0	0	0	0	0	0	0	0	0	0	0	0	0	0	0	0
gene-KI387_004093	bHLH	413.07	66.4	150.92	136.46	14.1	21.86	119.2	18.85	104.51	21.34	59.19	52.4	53.52	9.77	17.36	49.94	4.51	3.25	2.13	4.06	4.33	5.55	42.8	33.91	34.31	73.49	22.96	40.7	22.44	13.99	16.3	31.17	32.94	41.9	22.71	36.6	42.92	8.23	6.25	8.43	52.23	71.86	68.34	19.01	19.09	19.09
gene-KI387_004197	NAC	0	0.39	0.25	0.18	0	0	0	0	0	0	0	0	0	0	0	0	0	0	0	0	0	0	0	0	0	4.85	5.3	5.16	0.33	2.23	1.98	0	0	0	8.73	3.81	3.89	0.33	0.53	0.14	0	0	0	0	0	0
gene-KI387_004261	MYB	0.8	11.96	1.38	3.65	0	0.06	0	0	0	0	0	0	0	0	0	0	0	0	0	0.07	0	0.06	0	0	0	0.1	1.25	0.11	0.86	1.28	1.17	0.12	0.12	0.12	0.82	0.12	0.63	0.43	0	0.12	0.12	0.15	0.56	0.48	0.11	0.23
gene-KI387_004268	MYB	0	0.25	0.07	0	0	0	0	0	0	0	0	0	0	0	0	0	0	0	0	0	0	0	0	0	0	0.1	0.41	0.63	16.91	14.82	17.41	0.12	0.11	0.46	1.28	0.72	0.93	13.68	18.56	19.55	0.58	0.15	0.33	0.83	0.11	0
gene-KI387_004292	LIM	13.58	17.33	17.26	19.41	23.02	45.22	15.34	11.48	16.45	17.32	23.67	19.86	5.82	11.68	23.42	16.09	26.03	28.43	23.97	29.89	23.6	17.29	29.18	29.6	38.06	21.67	24.27	30.05	43.78	53.4	44.08	41.41	33.77	40.66	31.46	35.81	22.09	55.12	47.52	46.84	37.03	42.21	37.43	51.95	54.92	44.1
gene-KI387_004401	AP2/ERF-ERF	4.71	2.61	2.55	3.44	51.4	122.27	51.21	42.63	46.24	55.86	79.24	71.29	54.18	56.87	72.48	66.77	47.84	50.55	54.97	51.97	48.26	52.78	9.99	10.33	12.85	10.98	16.42	15.31	34.71	38.85	34.03	14.58	15.92	12.9	14.44	16.05	15.86	25.15	28.75	27.69	8.38	14.57	16.31	20.19	22.51	19.81
gene-KI387_004444	AP2/ERF-ERF	7.95	1.12	26.56	5.39	1	0	0.22	0.79	0.92	0.42	1.66	0	0.19	0.49	0	0	0	0	0	0	0	0	3.1	6.62	1.32	12.56	17.64	27.92	1.11	1.65	0.83	0	0.23	0	22.32	20.7	11.92	4.44	5.92	5.44	0.45	0	0.86	0	0	0.22
gene-KI387_004470	MYB-related	13.27	26.61	10.98	7.88	2.48	3.37	7.82	5.78	4.19	3.96	1.5	2.72	6.85	5.05	3.55	3.27	3.66	3.48	3.71	3.49	2.54	1.65	8.72	9.72	9.41	13.19	12.9	21.16	31.03	27.32	27.09	4.15	4.3	5.05	27.46	25.16	27.51	24.43	17.1	21.8	5.59	5.2	3.4	3.4	3.55	2.53
gene-KI387_004486	bHLH	65.44	123.07	107.72	114.67	84.32	57.18	94.89	130.17	104.57	129.06	114	134.05	89.62	104.95	139.5	143.46	98.07	110.42	95.49	100.76	105.7	79.44	159.72	154.43	163.51	88.1	95.17	108.52	112.15	103.49	99.79	175.6	185.08	176.74	112.45	104.5	105.94	106.73	82.2	100.73	127.74	188.15	179.11	217.37	208.65	208.28
gene-KI387_004589	C2H2	0.15	0.07	0.38	0.47	0.47	0	0	0.11	0	0.09	0	0	0	0.1	0.18	0.11	0.53	0.42	0.07	0.33	0.16	0.17	0.87	0.75	0.36	1.12	1.26	1.38	4.73	4.45	4.53	0.31	0.1	0.3	1.74	0.53	0.73	17.98	9.95	11.84	0.41	0	0.2	0.21	0.09	0
gene-KI387_004645	C2H2	3.82	8.78	6.23	4.44	4.56	3.91	4.97	6	5.73	5.7	8.37	7.98	5.57	5.41	8.44	6.62	3.97	6.04	4.45	5.16	4.19	4.36	6.03	6.06	6.29	8.54	8.22	8.84	14.63	16.47	16.93	10.57	11.84	12.51	6.18	7.08	6.93	15.82	13.26	13.63	6.3	9.47	6.51	11.27	11.21	9.56
gene-KI387_004675	C2H2	3.27	4.45	3.14	3.07	2.7	3.91	2.8	4.39	4.06	4.06	3.62	7.83	4.26	5.89	8.96	6.7	5.81	6.14	5.14	6.11	4.37	3.62	3.01	3.31	3.08	5.82	4.62	6.06	5.88	5.5	6.69	4.78	5.28	5.58	6.78	7.77	4.98	6.7	5.62	5.91	4.02	3.87	2.76	5.7	5.8	5.22
gene-KI387_004684	HB-BELL	10.68	18.81	17.93	10.95	0.51	0	0.19	0.15	0.23	0.06	0.6	0.26	0.11	0.03	0.84	0.27	0.06	0.17	0.03	0	0.02	0	27.82	28.36	28.3	45.04	51.99	53.98	29.73	30.01	29.23	33.98	33.46	38.47	62.18	64.9	52.38	38.32	36.98	45.53	24.5	27.72	24.09	32.3	35.5	30.56
gene-KI387_004793	NAC	51.86	63.69	56.63	59.04	26.5	28.46	29.05	52.35	23.98	49.36	27.87	61.87	56.75	64.5	85.49	61.54	105.37	106.1	100.39	97.85	92.3	68.47	51.07	48.39	47.78	51.95	52.28	57.68	66.57	63.59	64.08	54.4	56.63	61.2	62.19	54.84	55.25	80.84	74.84	68.83	81.55	123.7	107.8	98.31	92.32	94.92
gene-KI387_004874	RWP-RK	0	2.14	0.84	0.15	1.55	1.06	0.23	1.37	2.41	0.65	1.73	0.97	0.99	1.01	2.02	3.44	3	2.49	2.2	2.3	2.21	1.97	0.59	0.49	0	0.4	1.05	1.07	1.73	1.5	1.94	0.72	0.24	1.19	0.47	1.48	0	1.44	0.91	1.72	0.23	0.29	0.22	1.46	0.87	0.46
gene-KI387_004891	LOB	0	0	0	0	0	0	0	0	0	0	0	0	0	0	0	0	0	0	0	0	0	0	0	0	0	0	0	0	0	0	0	0	0	0	0	0	0	0	0	0	0	0	0	0	0	0
gene-KI387_004921	SBP	5.21	6.45	4.52	6.34	5.59	1.89	3.8	3.3	1.42	1.33	0.88	0.69	3.52	3.72	5.82	3.17	0.39	0.93	3.14	5.01	2.67	3.16	8.65	7.08	6.88	5.65	5.21	6.48	10	6.74	11.8	8.98	8.71	11.15	6.18	5.94	1.51	4.39	4.44	6.56	7.97	3.54	6.85	10.31	5.47	8.85
gene-KI387_004945	MYB	12.76	38.65	32.33	21.66	16.95	18.48	3.81	4.59	4.53	5.78	7.78	9.18	4.37	10.03	15.26	9.97	12.35	14.04	13.77	14.66	15.09	15.41	13.39	14.54	13.35	33.95	48.4	58.09	10.55	16.74	12.36	24.67	24.21	30.52	45.85	26.94	35.43	12.72	17.31	17.11	16.57	12.22	14.34	31.65	26.74	31.46
gene-KI387_005009	NF-YC	0	0	0	0	0	0	0	0	0	0	0	0	0	0	0	0	0	0	0	0	0	0	0	0	0	0	0	0	0	0	0	0	0	0	0	0	0	0	0	0	0	0	0	0	0	0
gene-KI387_005060	LOB	5.54	2.11	1.76	0	160.94	190	33.86	77.01	9.77	89.3	28.67	72.25	47.55	42.64	21.48	53	288.17	305.59	299.08	329.09	278.98	280.64	0	16.86	5.56	4.45	5.06	4.51	3.12	0	2.51	2.59	14.77	2.88	2.5	3.06	5.44	2.95	4.75	10.93	11.83	2.7	4.44	29.99	22.3	14.7
gene-KI387_005062	LOB	0	0	0	0	0.16	0	0.72	0	0.74	0.68	0.63	4.14	0	1.58	2.32	4.75	48.5	50.93	42.35	69.04	62.16	50.38	0	0	0	0	0	0	0	0	0	0	0	0	0	0	0	0	0	0	0	0.56	0	0	0	0
gene-KI387_005064	LOB	0	0	0	0	0.16	0	0.72	0	0.74	0.68	0.63	4.14	0	1.58	2.32	4.75	48.5	50.93	42.35	69.04	62.16	50.38	0	0	0	0	0	0	0	0	0	0	0	0	0	0	0	0	0	0	0	0.56	0	0	0	0
gene-KI387_005068	LOB	0	0	0	0	0	0	4.91	15.08	2.52	9.45	0	3.6	0	18.97	0	6.64	0	0	0	0	0	0	2.05	19.86	6.47	0	0	0	0	0	0	0	0	0	0	0	0	0	0	0	47.03	30.81	38.96	1.64	0	0
gene-KI387_005069	LOB	0	0	0	0	0	0	0	0.29	0	0	0	0	0	0	0	0.3	0	0	0	0	0	0	0	0	0	0	0	0	0	0	0	0	0	0	0	0	0	0	0	0	0	0	0	0	0	0
gene-KI387_005071	LOB	0	0	0	0	0	0	0	0	0	0	0	0	0	0	0	0	0	0	0	1.92	1.22	0.12	0	0	0	0	0	0	0	0	0	0	0.22	0	0	0	0	0	0	0	0	0	0	0	0	0
gene-KI387_005144	C2H2	0	0	0	0	0	0	0	0	0	0	0	0	0	0	0	0	0	0	0	0	0	0	0	0	0	0	0	0	0	0	0	0	0	0	0	0	0	0.68	0.18	0	0	0	0	0	0	0
gene-KI387_005151	C3H	8.31	15.2	12.09	10.4	46.06	61.05	67.93	57.47	51.7	82.51	77.94	66.62	61.52	65.13	69.12	77.02	49.67	42.59	49.8	95.03	79.66	60.53	19.48	20.57	11.45	7.23	11.17	13.29	19.74	24.72	25.41	11.29	7.38	12	15.6	15.2	19.84	18.31	22.12	19.48	16.29	14.01	12.61	13.22	8.59	8.62
gene-KI387_005203	NAC	30.52	23.44	31.82	20.51	15.12	24.03	27.28	22.61	21.03	18.99	16.85	24.43	28.28	30.79	36.21	23.61	20.62	21.61	21.62	20.97	18.44	16.86	88.43	86.71	86.26	130.03	99.48	76.08	250.26	187.49	211.41	29.94	26.43	30.3	120.51	115.09	77.16	92.53	99	106.41	63.78	58.08	56.4	39.9	37.63	36.99
gene-KI387_005264	MYB-related	0.66	1.47	2.32	1.68	1.44	5.08	2.87	4.85	4.26	4.74	2.05	4.84	3.24	3.11	8.33	3.92	4.65	4.65	4.19	4.19	3.25	2.96	7.72	9.24	6.75	6.02	5.52	3.33	4.14	4.75	8.18	11	7.72	11.82	8.93	4.54	3.93	7.5	7.41	10.9	7.92	20.49	7.28	13.75	7.07	8.16
gene-KI387_005272	AP2/ERF-RAV	2.24	31.12	14.86	4.01	0	1.38	1.26	0.55	5.9	0.15	26.29	0.54	0.07	0	1.84	0.28	10.94	7.28	9.62	2.29	2.38	3.21	93.33	94.89	90.4	19.06	25.91	26.63	25.15	25.33	22.7	39.67	33.5	34.32	66.93	89.66	46.64	25.66	22	28.13	219.96	140.31	147.57	47.46	44.38	44.17
gene-KI387_005277	MYB	37.23	51.13	50.72	9.97	41.19	33.92	9.31	26.27	18.58	34.74	35.39	40.99	16.99	37.4	52.7	38.9	51.86	48.1	51.49	36.06	28.94	24.21	66.59	59.43	61.65	19.28	27.21	11.17	91	83.99	87.97	55.57	62.68	62.62	43.15	88.07	27.16	12.17	8.65	8.93	20.26	21.25	18.16	26.36	24.74	24.11
gene-KI387_005295	Trihelix	3.25	3.99	4.75	2.47	3.01	2	6.1	7.03	7.09	6.51	4.01	7.73	5.46	5.59	11.23	7.58	6.22	6.54	7.08	5.51	3.99	3.35	3.57	4.51	3.65	5.43	6.27	8.11	5.83	6.06	7.32	5.41	4.95	5.59	10.87	11.65	10.75	5.62	6.44	5.64	4.19	5.92	5.37	3.77	4.69	3.61
gene-KI387_005311	C3H	5.12	3.49	3.1	1.41	2.19	1.37	4.02	4.17	3.67	2.91	2.89	6.46	1.7	4.11	5.55	3.55	8.66	6.67	8.15	4.15	4.59	3.79	3.09	4.71	4.19	1.73	2.02	3.47	6.36	4.53	2.48	4.62	5.86	3.18	3.85	4.03	3.27	2.49	5.02	3.06	2.47	4.5	5.59	3.97	4.36	4.67
gene-KI387_005359	bHLH	0.74	2.62	0.95	0.99	25.05	0.17	4.85	5.98	16.69	7.15	4.77	11.4	4	4.29	17.89	10.44	10.9	11.64	10.49	6.37	9.1	6.53	17.26	14.2	15.22	1.85	2.87	2.7	19.88	19.45	22.15	23.82	27.07	24.39	3.05	1.54	1.66	9.11	14.26	16.09	7.58	7.37	6.56	14.04	14.22	14.98
gene-KI387_005383	C2C2-Dof	0.82	3.02	1.34	0.94	4.63	0	3.21	7.87	5.49	6.78	9.26	13.71	4.52	9.44	13.87	17.77	1.86	3.55	3	5.74	5.48	3.15	11.41	8.67	10.06	2.51	2.79	2.34	9.48	7.73	9.25	17.55	23.09	20.72	6.85	4.04	5.15	4.97	6.07	5.18	16.36	11.54	13.2	11.39	9.29	14.35
gene-KI387_005494	AP2/ERF-ERF	0	0	0	0	2.61	0	4.36	1.77	1.5	2.77	6.36	6.29	7.6	6.41	4.7	3.85	0	0	0	0	0.38	0	0	0	0	0	0	0	0	0	0	0	0	0	0	0	0	0	0	0	0	0	0	0	0	0
gene-KI387_005567	NAC	0.26	3.7	1.05	12.01	0.05	0	7.85	5.45	15.68	8.33	54.35	19.9	1.24	6.1	79.68	17.18	5.44	8.84	5.1	15.66	13.23	13.13	3.87	3.54	5.11	2.3	3.19	1.94	4.13	4.52	5.73	4.49	2.89	2.69	4.18	3.62	3.92	0.83	1.53	2.57	1.13	0.71	0.97	0.92	0.72	1.11
gene-KI387_005610	LOB	17.68	11.39	8.53	65.82	38.32	49.57	46.48	46.55	31	43.61	34.37	45.57	41.21	35.55	57.33	44.93	19.06	28.3	31.36	23.1	21.8	17.74	21.85	12.17	12.13	3.94	4.14	3.3	41.44	36.82	47.01	29.66	24.82	21.83	3.67	4.35	4.86	12.8	13.41	16.25	8.96	6.06	8.11	9.07	9.17	10.3
gene-KI387_005677	TCP	0	0	0.53	0.56	0	0	1.68	0	2.31	4.73	4.57	11.77	1.44	2.45	5.06	2.83	2.19	0	0	0.27	0	0	0.62	0.5	0.56	0	0.44	0	21.44	24.75	14.87	0.5	0.5	1.5	0	0	0	4.72	8.88	6.12	0.96	0	2.28	0	0	0
gene-KI387_005698	AP2/ERF-AP2	0	0.14	0	0	0.05	0	0	0	0	0	0	0	0	0	0	0	0	0	0	0	0	0.05	0	0	0	0.08	0	0.09	0.12	0.09	0.27	0	0	0	0.2	0.1	0	0.12	0	0	0	0.12	0	0	0	0
gene-KI387_005781	LOB	3.07	22.71	4	7.87	33.35	0.21	13.81	32.71	11.59	48.8	19.95	44.24	5.68	32.3	12.73	49.35	60.32	52.07	66.73	27.71	19.18	26.43	54.38	61.4	66.57	8.5	4.52	8.16	9.97	4.52	6.28	79.14	93.19	90.25	5.44	1.45	1.68	7.14	9.14	7.58	114.7	106.77	101.95	182.21	154.7	183.75
gene-KI387_005822	HB-HD-ZIP	5.73	7.42	4.98	4.64	0	0	0	0	0	0	0	0	0.04	0	0	0	0	0	0	0	0.02	0	0	0	0	34.77	29.59	33.96	84.82	76.52	78.43	0.24	0.23	0.05	41.91	40.43	31.2	38	41.88	47.49	0	0.06	0	0	0	0.14
gene-KI387_005842	LOB	0	0	0	0	0	0	0	0	0	0	0	0	0	0	0	0	0	0	0	0	0	0	0	0	0	0	0	0	0	0	0	0	0	0	0	0	0	0	0	0	0	0	0	0	0	0
gene-KI387_005849	RWP-RK	11.39	15.92	18.18	11.61	19.52	21.01	12.42	15.83	19.04	18.75	16.09	25.01	16.57	20.86	23.04	19.71	29.06	23.02	22.87	19.59	15.42	17.23	17.24	13.45	13.62	14.89	17.28	16.29	23.2	19.19	21.07	19.73	19.74	17.05	20.16	21.93	21.22	25.4	20.99	23.07	23.4	19.54	23.95	24.26	23.23	21.36
gene-KI387_005960	MADS-M-type	0	0	0	0	0	0	0	0	52.34	0	45.61	0	51.9	0	0	0	0	0	6.65	0	0	0	0	0	0	0	0	0	0	0	0	0	0	0	0	0	0	311.49	234.13	521.7	0	0	57.65	40.93	0	30.17
gene-KI387_005963	C2H2	14.74	17.08	14.55	10.39	11.35	13.06	18.81	18	21.39	19.3	21.66	20.62	18.4	23.41	28.46	29.14	22.8	26.29	21.9	18.42	19.1	14.18	12.16	16.44	14.05	18.57	23.82	22.57	25.01	22.38	31.09	24.85	21.84	27.46	20	17.35	23.01	30.11	31.12	29.53	17.46	18.44	13.9	23.03	23.25	19.38
gene-KI387_006005	C2H2	0	0	12.66	0	7.79	4.13	0	0	52.34	0	0	0	0	0	0	0	0	5.19	0	5.4	12.46	3.82	0	0	0	31.48	0	88.92	0	0	0	0	0	42.22	0	40.9	0	0	0	0	0	0	0	0	0	0
gene-KI387_006010	HB-WOX	5.69	14.03	9.1	12.37	5.72	4.91	5.46	4.44	8.4	7.76	8.94	9.24	7.84	8.45	10.7	10.17	20.72	13.8	16.67	11.21	11.23	8.2	8.14	6.67	8.06	5.75	7.7	5.44	21.38	18.14	20.04	9.8	11.01	7.35	6.41	9.61	8.97	14.03	11.99	13.1	9.73	9.63	11.65	7.15	7.57	6.29
gene-KI387_006134	MYB-related	0	0	0	0	0	0	0	0	0	0	0	0	0	0	0	0	0	0	0	0	0	0	0	0	0	0	0	0	0	0	0	0	0	0	0	0	0	0	0	0	0	0	0	0	0	0
gene-KI387_006146	bZIP	35	32.06	23.42	25.34	34.58	32.89	29.81	30.38	25.14	26.33	24.53	27.31	33.66	38.53	36.27	32.61	44.63	49.21	46.01	48.39	51.4	47.37	75.27	74.08	70.43	46.92	44.89	47.72	51.03	46.99	47.22	114.57	100.28	111.7	55.43	54.76	52.01	62.57	61.08	60.94	72.03	104.09	84.98	131.63	133.37	128.43
gene-KI387_006164	MYB-related	12.39	11.87	15.22	10.02	9.38	30.26	22.96	9.35	17.37	16.08	20.04	17.68	9.35	15.19	28.11	20.33	20.94	28.23	26.57	14.81	15.2	22.2	20.82	10.15	8.04	40.34	51	46.51	33.67	37.73	36.75	12.48	26.22	22.75	65.94	54.89	101.35	52.33	64.87	67.9	34.44	27.02	23.18	23.61	13.5	14.88
gene-KI387_006168	HB-other	1.89	4.38	1.64	2.29	2.57	3.56	11.24	10.59	10.96	10.67	7.84	9.24	9.61	12.28	14.18	9.87	9.89	8.67	11.52	8.34	6.66	6.34	8.58	7.45	8.78	0.76	2.24	1.74	3.63	3.78	3.64	8.34	7.63	10.67	1.49	0.93	1.6	2.36	2.58	5.09	3.85	9.68	6.95	7.6	7.32	8.18
gene-KI387_006192	PLATZ	92.37	32.23	29.12	71.26	14.93	11.98	46.55	18	27.35	26.28	25.7	18.16	20.91	7.83	9.51	24.65	5.44	5.47	2.08	9.42	8.67	8.54	197.81	219.18	231.09	145.83	118.82	130.71	53.75	38.25	44.69	274.83	261.23	262.51	124.71	109.12	114.84	41.08	36.49	33.19	249.94	300.71	280.87	266.66	265.11	256.26
gene-KI387_006222	HB-BELL	3.15	4.7	6.14	3.71	0	0	0	0.05	0.04	0.04	0	0.11	0	0	0	0	0.03	0	0	0	0	0	2.55	2.88	2.44	9.56	9.84	12.14	4.02	5.16	6.02	8.02	7.64	9.05	11.68	13.58	12	10.54	10.17	10.36	18.86	21.18	16.89	21.73	22.82	20.95
gene-KI387_006232	bHLH	17.96	20.52	20.6	10.65	19.76	36.62	38.73	46.26	41.45	39.92	43.05	44.49	35	53.38	59.52	47.43	41.55	40.79	40.9	27.58	30.43	24.28	45.4	46.03	36.12	32.56	42.16	34.61	44.53	46.86	42	56.91	48.3	45.58	41.75	41.57	35.13	49.38	44.27	37.67	72.66	67.3	68.33	60.39	70.75	65.04
gene-KI387_006248	SBP	0	0	4.85	8.32	4.42	4.63	0	0	0	0	0	0	0	0	0	0	6.68	0	0	0	4.83	0	0	33.75	40.96	0	0	0	0	0	0	0	0	0	0	0	0	0	36.16	0	0	0	0	0	0	0
gene-KI387_006274	MADS-MIKC	0	0	0	0	0	0	0	0	0	0	0	0	0	0	0	0	0	0	0.18	0	0	0	0	0	0	0	0	0	0	0	0	0	0	0	0	0	0	1.36	0	0	0	0	0	0	0	0
gene-KI387_006408	C2H2	9.26	9.31	9.95	5.58	4.12	2.34	7.72	9.9	7.92	10.59	6.7	8.53	6.55	12.87	17.2	10.31	11	9.9	9.04	5.73	5.3	5.26	11.36	13.06	15.33	15.29	16.13	17.6	11.8	8.37	10.09	20.98	26.1	23.2	13.49	12.75	14.57	13.18	14.39	13.52	11.75	23.83	18.02	14.91	13.46	14.3
gene-KI387_006417	C2H2	10.34	17.69	17.73	8.49	5.95	3.83	12.16	20.47	13.42	20.69	16.1	24.57	18.11	21.85	39.22	23.69	15.62	13.38	18.32	12.61	12.03	9.16	22.47	15.61	11.7	17.25	12.98	17.77	14.51	12.9	12.46	20.71	25.25	23.09	18.85	14.94	16.08	15.89	13.12	18.41	26.13	26.12	24.41	16.53	18.63	20.19
gene-KI387_006418	C2H2	24.04	42.41	32.62	26.51	11.03	6.36	35.03	52.51	39.85	50.06	39.22	56.11	40.38	55.17	106.97	59.95	40.56	37.86	31.15	25.92	27.99	16.65	41.61	42.48	40.73	28.63	29.96	37.75	27.83	28.72	28.24	54.04	56.34	50.96	43.67	35.87	34.65	45.39	37.93	34.66	21.42	60.09	37.94	43.1	37.05	41.43
gene-KI387_006500	EIL	20.86	21.25	17.37	16.27	13.54	22.67	44.51	48.56	40.08	40.72	26.73	30.95	40.26	37.59	33.49	31.85	12.15	10.23	10.24	12.32	10.93	8.92	20.57	18.53	20.86	22.05	18.18	23.43	14.45	11.38	12.29	27.62	29.57	32.63	20.16	17.79	15.47	27.86	27.94	34.1	36.15	30.4	29.67	17.61	19.99	16.82
gene-KI387_006534	MYB-related	0	0	0	0	0	0	0	0	0	0	0	0	0	0	0	0	0	0	0	0	0	0	0	0	0	0	0	0	0	0	0	0	0	0	0	0	0	0	0	0	0	0	0	0	0	0
gene-KI387_006536	MYB-related	0.19	0	0	0.33	1.15	0	0	0	0	0	0	0	0	0	0	0.33	0.37	0.73	0.53	0.8	0.65	0.69	0	0	0	0	0	0	0	0	0	0	0	0	0	0	0	0	0	0	0	0	0	0	0	0
gene-KI387_006537	MYB-related	0	0	0	0	0	0	22.08	66.35	65.19	53.87	46.02	67.13	0	24.1	0	90.65	63.71	17.29	47.61	53.14	70.46	86.52	70.62	35.57	11.94	0	0	0	0	0	0	0	0	0	0	0	0	0	0	0	25.06	78.2	57.6	0	11.07	0
gene-KI387_006538	MYB-related	0	0	0	0	0	0	16.91	20.66	11.34	16.46	19.04	42.27	0	0	12.5	7.73	0	0	0	0	0	0.81	0	0	0	0	0	0	3.58	0	0	0	0	0	0	0	0	3.36	0	12.56	2.7	0	0	0	0	0
gene-KI387_006539	MYB-related	0	0	0	0	0	0	0	0	0	0	0	0	0	0	0	0	0	0	0	0	0	0	0	0	0	0	0	0	0	0	0	0	0	0	0	0	0	0	0	0	0	0	0	0	0	0
gene-KI387_006540	MYB-related	0	0	0	0	0	0	0	0	0	0	0	0	0	0	0	0	0	0	0	0	0	0	0	0	0	0	0	0	0	0	0	0	0	0	0	0	0	0	0	0	0	0	0	0	0	0
gene-KI387_006541	MYB-related	0	0	0	0	0	0	0	1.24	7.41	2.91	23.57	23.35	0	0	6.46	22.65	0	0	0	0.39	0.31	0	1.01	0	0	0	0	0	0	0	0	0	0	0	0	0	0	0	1.45	0	0	0	0	0	0	0
gene-KI387_006676	Trihelix	5.83	19.01	7.82	8.54	0.56	0.08	0.05	0	0.14	0.09	0.04	0.13	0	0.05	0.69	0.22	0.63	0.82	0.8	1.75	1.93	1.39	3.24	3.66	2.56	64.21	52.02	50.28	28.29	31.88	31.87	13.45	12.94	15.99	45.43	54.69	53.64	57.42	65.74	53.08	11.68	11.16	9.5	35.95	33.07	33.15
gene-KI387_007085	WRKY	0	0	0	0	0	0	0	0	0	0	0	0	0	0	0	0	0	0	0	0	0	0	0	0	0	0	0	0	0	0	0	0	0	0	0	0	0	0	0	0	0	0	0	0	0	0
gene-KI387_007139	MYB-related	12.61	20.72	20.92	26.34	28.68	0.73	2.47	4.08	2.29	4.57	3.28	9.01	2.38	6.72	12.93	7.53	14.4	14.31	17.24	12.33	15.58	11.4	11.26	12.64	14.6	15.26	15.8	18.3	22.74	23.24	20.32	10.66	11.16	11.78	21.43	17.99	21.23	14.48	14.84	16.05	4.77	5.85	7.21	8.74	7.34	7.55
gene-KI387_007141	MYB-related	9.58	6.51	6.49	4.58	3.77	0	0	8.45	0	0	0	0	0	0	0	0	6.38	3.16	11.53	6.7	10.06	5.5	5.43	19.78	11.5	6.26	14.34	9.42	21.76	41.33	21.34	3.6	0	4.11	31.22	17.37	11.66	12.17	42.76	15.29	0	3.66	6.13	12.8	20.88	23.82
gene-KI387_007143	MYB-related	0	0	1.08	0	0	0	0	0	0	0	0	0	0	0	0	0	12.76	10.54	11.53	6.7	3.66	3.66	5.43	6.59	0	12.52	3.59	3.14	8.7	6.36	10.67	0	8.47	8.23	0	4.34	3.89	0	0	7.64	0	3.66	0	17.06	0	0
gene-KI387_007144	MYB-related	0	0	0	0	0	0	0	0	0	0	0	0	0	0	0	0	0	0	0	0	0	0	0	0	0	0	0	0	0	0	0	0	0	0	0	0	0	0	0	0	0	0	0	0	0	0
gene-KI387_007149	MYB-related	2.74	2.6	7.57	6.87	0	0	0	0	0	0	0	10.47	0	7.63	0	0	8.93	4.21	21.78	4.47	3.66	8.24	0	0	15.34	3.13	0	0	4.35	3.18	0	14.41	4.24	20.56	3.47	0	0	0	3.29	0	6.49	7.31	3.06	4.27	6.96	3.4
gene-KI387_007190	AP2/ERF-ERF	0.35	0.23	0	0	0.07	0.41	0	0	0	0	0	0	0.25	0	0.28	0	0	0	0	0	0	0	0.39	0	0.18	0.93	0.84	1.14	0.19	0.43	0.43	0	0	0	1.1	0.65	1.55	0.19	0.46	0.82	0.16	0.2	0	0	0	0
gene-KI387_007191	MYB-related	24.43	46.4	42.04	21.35	42.61	60.08	84.76	87.87	99.98	84.1	75.31	99.69	60.06	105.37	117.62	97.81	81.33	91.89	82.45	61.49	57.32	47.71	58.24	59.05	60.56	50.55	48.14	44.5	55.31	58.85	52.19	93.68	98.81	87.53	51.69	46.24	65.03	82.98	78.5	85.62	46.24	45.65	49.51	71.45	67.73	68.81
gene-KI387_007251	AP2/ERF-ERF	2.5	1.64	5.78	0.97	0	0.08	0	0	0.3	0	0.27	0	0.12	0	0	0	0	0	0	0	0.08	0	0.56	0.95	0.18	1.81	2.97	3.71	0.37	0.14	0	0.31	0	0	4.12	5.54	2.32	0.19	0.44	1.11	0	0.19	0.15	0	0	0
gene-KI387_007307	bZIP	0	0	0	0	0	0	0	0	0	0	0.08	0	0	0	0	0	0	0	0	0	0	0.08	0	0	0	0	0	0	0	0	0	0	0	0	0	0	0	0	0	0	0	0	0	0	0	0
gene-KI387_007314	C2H2	13.1	67.88	30.29	24.09	14.96	16.64	53.58	93.83	51.06	52.1	131.83	123.58	24.52	0	255.91	0	81.08	73.12	52.69	49.9	88.75	79.82	23.44	37.48	74.68	13.41	75.96	51.58	53.65	65.45	136.38	14.63	37.73	36.19	81.27	54.67	49.4	31.33	78.36	108.64	73.58	41.16	49.73	36.12	85.15	81.12
gene-KI387_007332	GARP-ARR-B	7.54	14.14	13.91	11.54	6.09	7.29	8.35	7.69	7.6	9.26	7.38	14.5	11.38	12.71	17.75	12.26	4.9	5.61	5.8	4.53	4.01	2.9	7.25	7.3	6.88	10.72	15.06	16.13	14.25	16.11	13.17	7.47	7.46	7.66	19.66	13.82	12.36	9.16	10.75	9.35	2.44	2.82	3.39	5.74	6.22	6.79
gene-KI387_007338	LOB	0	0	0	0	0	0	0	0	0	0	0	0	0	0	0	0	0	0	0	0	0	0	0	0	0	0	0	0	0	0	0	0	0	0	0	0	0	0	0	0	0	0	0	0	0	0
gene-KI387_007362	C2C2-GATA	2.27	11.24	5.68	4.52	0	0	0	0	0	0	0	0	0	0	0	0	0	0	0	0	0	0	0	0	0	10.86	15.24	16.04	9.42	9.14	8.37	0	0	0	15.59	14.28	27.58	13.65	12.24	14.29	0	0	0	0	0	0
gene-KI387_007382	AP2/ERF-ERF	76.76	7.11	31.27	7.96	245.85	5.95	39.47	41.95	49.57	42.52	117.04	74.77	169.97	92.43	122.19	73.42	49.55	62.56	52.41	207.34	355.71	265.59	1487.7	1597.52	1643.74	503.05	231.75	322	128.25	134.6	116.38	704.87	714.02	711.61	209.14	81.15	178.4	128.94	57.7	48.97	1413.6	931.76	1046.49	198.6	191.52	184.7
gene-KI387_007401	AP2/ERF-ERF	9.79	3.89	3.57	4.03	0	0	0.59	2.1	0	0	1.07	1.65	2.02	0	1.19	0.74	0	0	0.61	0	0	0.24	41.63	59.06	62.63	9.94	2.77	1.37	146.65	133.59	134.52	32.57	35.23	28.55	10.62	11.42	7.09	22.68	39.81	62.51	49.26	36.08	38.79	42.3	43.19	48.56
gene-KI387_007433	AP2/ERF-ERF	0	0	0	0	0	0	0	0	0	0	0	0	0	0	0	0	0	0	0	0	0	0	0	0	0	0	1.79	0	25.59	24.16	20.13	0	0	0	0.33	0	0	4.86	3.52	3.81	0	0	0	0	0	0
gene-KI387_007434	AP2/ERF-ERF	0	0	0	0.32	0	0	0	0	0	0	0	0	0	0	0	0	0	0	0	0	0	0	0	0	0	0	0.23	2.1	37.51	41.51	38.19	0	0	0	1.55	0	0.23	11.01	9.2	8.05	0	0	0	0	0	0
gene-KI387_007472	PLATZ	4.28	2.84	1.81	4.68	5.54	6.85	0.59	3.64	2.01	6.17	2.54	8.87	0	4.65	4.65	6.43	14.53	14.44	21.91	7.94	7.42	4.99	24.12	23.03	22.33	2.39	4.83	3.27	6.38	9.87	9.34	33.66	37.31	27.58	1.41	2.52	3.26	8.1	7.95	7.73	19.18	23.54	22.56	52.51	42.65	54.89
gene-KI387_007494	MYB-related	4.47	7.3	5.48	5	4.25	3.34	4.36	3.96	4.57	3.39	3.78	4.49	5.66	6.4	6.39	3.57	4.64	5.74	4.19	4.64	4.1	3.38	4.01	4.66	4.44	8.74	10.26	9.85	11.03	10.57	12.03	5.16	4.65	3.99	9.16	7.86	8.5	13.05	12.34	12.99	3.1	4.12	3.22	3.2	5.96	3.45
gene-KI387_007520	bHLH	3.01	0.67	0	7.91	0	0	37.81	3.63	70.35	5.76	69.33	12.84	26.28	8.2	38.42	10.18	1.79	15.65	0.63	1.35	4.22	2.31	35.89	21.73	25.35	0.84	1.77	0.3	2.01	1.49	2.11	2.35	1.98	0.33	5.91	2.77	1.2	4	7.9	17.79	8.77	9.69	9.3	2.73	1.51	2.58
gene-KI387_007570	bHLH	1.57	1.11	1.56	1.42	4.05	2.84	0.3	2.93	2.7	9.21	4.53	5.4	1.28	12.66	7.97	6.83	1.38	0.83	0.53	8.26	6.05	3.54	0.53	0.11	0.25	1.67	1.35	2.37	4.67	2.58	3.17	0.89	0.97	0.43	2.19	2.15	1.36	4.55	5.39	4.53	0	0.27	0.42	0.67	0.4	0.86
gene-KI387_007687	HB-HD-ZIP	367.48	52.42	62.06	62.07	96.47	87.57	642.38	256.98	662.33	195.26	621.81	229.24	290.45	148.67	51.66	255.66	68.68	54.66	53.51	74.32	81.54	93.31	114.58	113.27	116.13	85.59	89.39	101.22	59.99	52.58	51.96	148.06	137.68	143.07	73.97	72.98	105.84	73.42	69.76	64.72	85.7	108.93	117.2	95.3	92.2	81.83
gene-KI387_007748	HB-HD-ZIP	41.08	221.74	93.46	175.44	22.86	0	10.16	7.3	18.87	11.43	57.77	36.55	2.38	11.68	38.55	28.2	65.41	74.57	67.85	154.82	181.37	239.25	195.06	231.38	202.3	288.93	247.31	233.43	274.01	318.02	298.11	45.32	49.39	46.07	164.36	98.76	140.61	113.75	108.73	84.75	149.95	136.38	141.99	131.09	118.08	119.13
gene-KI387_007796	bHLH	0.96	0.85	2.25	0.76	0.22	0.28	0.32	1.06	0.49	0.74	0.31	1.42	0.64	0.95	0.91	1.43	0.19	0.15	0.41	0.21	0.03	0.04	1.24	1.08	1.35	0.57	1.06	0.46	0.29	0.16	0.33	5.21	3.84	3.81	1.58	0.93	0.8	1.02	1.24	1.58	0.37	1	0.95	3.15	2.37	2.11
gene-KI387_007797	bHLH	27.63	24.39	29.55	17.17	10.02	9.62	11.33	20.68	16.63	22.24	16.08	21.56	17.83	20.87	25.08	20.61	11.91	14.23	12.37	8.55	7.54	6.13	29.05	32.01	31.39	21.34	22.49	21.52	22.07	16.45	19.81	39.17	40.18	39.92	43.15	47.89	30	18.4	20.87	20.33	33.11	43.21	43.68	54.97	52.35	51.91
gene-KI387_007842	NF-YB	50.64	163.64	78.78	66.56	25.07	29.04	7.45	13.29	10.28	7.99	14.62	11.21	14.18	19.64	22.26	13.36	27.18	30.43	25.74	17.44	18.73	18.96	19.24	24.88	26.04	83.14	99.03	98.47	140.16	145.04	130.83	41.21	37.16	30.87	101.97	69.51	84.02	167.24	171.07	186.44	22.13	14.86	25.62	43.58	36.55	34.8
gene-KI387_007873	HB-HD-ZIP	2.02	1.46	2.08	1.09	0.85	1.89	1.06	1.4	0.77	1.74	0.28	2.17	1.27	1.87	1.98	1.09	2.11	1.65	1.69	0.75	0.39	0.41	0	0	0	9.81	8.16	11.89	7.57	10.16	9.24	0	0.08	0.25	11.76	13.65	7.56	9.93	8.64	7.79	0	0	0	0	0	0
gene-KI387_007886	C3H	8.49	4.85	3.56	2.94	5.34	10.66	25.83	29.1	29.71	16.14	12.47	23.51	25.4	21.01	26.08	21.38	15.51	15.7	14.86	8.61	8.99	8.99	37.18	38.68	41.61	21.59	16.07	10.56	18.28	17.13	17.3	64.43	68.97	48.02	13.02	17.17	13.37	28.11	24.42	33.89	53.74	43.61	44.23	55.49	71.5	68.91
gene-KI387_007935	AP2/ERF-ERF	4.76	10.27	4.5	1.35	0.23	0	0.76	0.91	1.57	0	11.6	0	0	0.83	1.56	0.97	1.13	0.3	0.72	0.33	0.26	0	0	0	0	13.13	28.21	23.18	6.76	7.79	8	0.63	0	0	34.94	15.32	35.38	4.45	5.88	7.08	15.63	13.94	9.12	1.31	0	0.6
gene-KI387_008168	C2H2	0.29	0.47	0.78	0	0.13	0.4	0.52	0.8	0.8	0.64	0.41	1.07	0.29	0.94	1.09	0.31	1.13	0.87	0.59	0.26	0.2	0.21	0.06	0.57	0.33	1.73	1.4	1.41	0.46	0	0.26	1.06	1.01	1.72	1.19	1.26	0.51	3.11	2.69	1.33	1.25	0.6	1	0.14	0.83	1.21
gene-KI387_008233	LIM	30.53	47.15	57.08	34.03	60.65	198.51	69.21	85.63	94.24	102.78	102.97	104.38	51.5	131.91	134.92	119.8	93.72	78.02	80.54	72.79	67.18	47.48	103.57	108.69	114.57	38.71	32.85	28.52	48.02	37.05	45.19	108.96	109.59	105.57	38.45	32.98	34.98	70.57	66.61	63.1	117.98	101.76	114.92	108.24	105.61	117.46
gene-KI387_008345	C3H	25.84	39.67	34.41	25.28	24.88	43.08	22.65	25.47	24.01	27.6	25.06	36.45	27.97	31.25	58.77	32.04	46.01	62.85	50.44	39.75	38.99	28.28	16.65	14.59	17.46	26.28	32.63	38.74	45.84	41.82	42.04	22.6	19.08	21.62	35.01	32.32	34.73	58.14	55.64	61.18	13.7	14.24	16.54	17.12	19.72	17.55
gene-KI387_008357	MYB	0	0.74	0.51	3.57	1.18	2.59	0.28	0.76	0.1	1.04	0	0.13	0.24	0.4	0	0	1.44	0.06	0.28	0.13	0.11	1.23	25.63	27.5	24.01	2.32	2.33	2.66	1.11	0.83	1.47	17.59	20.12	18.14	3.25	1.89	0.9	0.12	0.2	0.11	7.48	10.08	9.99	11.67	9.6	13.06
gene-KI387_008409	AP2/ERF-ERF	5.23	31.9	19.75	4.63	88.96	225.69	22.94	24.73	49.19	49.33	182.7	114.37	3.38	131.97	279.19	128.12	471.93	496.83	483.04	444.09	431.46	335.61	10.86	8.03	12.96	2.97	2.45	3.6	0.61	0.91	1.14	6.62	6.72	4.76	3	3.92	3.61	5.78	3.61	3.63	7.92	14.84	12.3	7.47	9.6	8.08
gene-KI387_008527	Trihelix	8.83	14.19	15.71	16.8	12.39	29.54	12.27	20.1	14.48	20.89	20.64	21.98	18.58	18.85	29.57	21.11	11.16	14.88	14.02	11.11	10.42	11.13	18.15	15.52	16.26	19.4	18.16	18.99	12.97	18.48	17.47	28.73	30.23	29.05	21.99	15.59	16.35	19.16	21.67	20.71	19.91	18.35	15.63	32.06	26.39	27.67
gene-KI387_008574	HB-WOX	8.27	23.14	14.77	20.89	25.02	44.55	6.68	15.79	10.36	12.57	9.15	18.15	14.71	16.78	20.02	17.55	17.25	17.08	19.35	16.37	14.34	13.92	24.93	24.59	22.89	16.48	18.91	19.98	31.26	32.61	32.81	63.48	58.65	65.62	23.66	19.9	19.57	21.7	19.46	18.44	14.86	15	14.41	74.62	71.7	77.2
gene-KI387_008798	GRAS	0	0	0	0	0	0	0	0	0	0	0	0	0	0	0	0	0	0	0	0	0	0	0	0	0	0	0	0	0	0	0	0	0	0	0	0	0	0	0	0	0	0	0	0	0	0
gene-KI387_008822	Whirly	3.82	2.99	1.84	3.23	2.35	3.2	2.36	2.83	2.96	3.63	1.14	3.93	2.42	2.45	4.27	4.31	4.97	3.05	4.69	2.63	2.72	1.52	2.66	2.89	2.98	2.41	2.68	3.52	7.65	9.16	6.96	4.07	3.26	6.13	3.52	2.84	2.96	6.63	5.97	5.31	3.03	2.63	4	3.77	3.98	3.55
gene-KI387_008823	Whirly	1.4	1.93	3.61	2.4	4.82	3.99	2.85	8.34	7.92	7.16	7.36	12.21	3.15	9.58	8.53	5.61	4.67	6.26	4.58	3.69	3.8	2.87	2.45	3.2	1.29	0.72	2.01	0.76	3.08	0.76	1.54	1.72	3.65	3.39	1.96	2.36	1.78	2.39	1.35	2.33	3.06	2.77	3.98	3.2	5.92	5.78
gene-KI387_008824	Whirly	7.92	4.61	4.08	0.89	8.74	10	1.2	7.36	5.85	5.01	1.93	7.44	1.78	2.92	2.31	5.89	13.72	10.31	11.04	7.31	4.23	4.91	0	3.33	2.02	0.99	1.83	4.48	1.43	1.59	2.14	1.49	2.93	5.01	1.17	0.92	3.19	3.2	1.69	1.52	0.87	1.08	2.49	3.33	1.07	1.72
gene-KI387_008908	LOB	35.63	13	9.86	81.48	18.02	31.94	216.78	118.65	232.62	95.62	167	38.07	101.79	53.24	74.9	46.23	4.97	1.95	3.68	5.81	8.17	7.98	13.86	14.98	14.61	0.86	0.9	0.23	0.31	0.92	0	16.79	18.18	12.47	1.01	1.06	0.23	2.47	1.46	2.9	7.03	21.32	13.92	3.92	8.81	4.97
gene-KI387_008994	GRAS	0	0	0	0	0	0	0	0	0	0	0	0	0	0	0	0	0	0	0	0	0	0	0	0	0	0	0	0	0	0	0	0	0	0	0	0	0	0	0	0	0	0	0	0	0	0
gene-KI387_008995	GRAS	0	0	0	0	0	0	0	0	0	0	0	0	0	0	0	0	0	0	0	0	0	0	0	0	0	0	0	0	0	0	0	0	0	0	0	0	0	0	0	0	0	0	0	0	0	0
gene-KI387_009116	HB-other	0	0	0	0	17.19	0	1.17	7.67	0.6	0.55	0	1.64	0.5	0.64	0	2.22	0	0	0	2.5	0.9	0	40.77	34.55	47.9	0	0	0	3.08	1.37	2.33	44.76	37.11	40.29	0	0	0	4.27	1.93	4.74	22.29	39.57	32.96	26.63	35.5	31.07
gene-KI387_009117	HB-KNOX	0	0	0	0	0	0.06	0	0.11	0	0.09	0	0.13	0	0.21	0	0	0	0	0	0.07	0.06	0.23	0.52	0.67	0	0	0	0	13.63	12.58	13.2	15.85	13.39	18.51	0.11	0	0	2.08	2.57	2.87	1.8	1.2	1.73	17.57	17.43	19.97
gene-KI387_009119	HB-KNOX	0.33	0.08	0	0.14	2.15	1.71	0	0	0	0	0	0	0	0.11	0	0	5.29	3.51	2.03	8.28	7.74	6.52	53.58	60.55	60.74	0.09	0	0.19	24.98	23.61	26.15	79.46	74.76	83.32	0	0	0	10.81	10.3	10.16	58.42	68.28	68.38	65.77	62.07	64.06
gene-KI387_009134	HB-other	0	0	0	0	0	0	0	0	0	0	0	0	0	0	0	0	0	0	0	0	0	0	0	0	0	0	0	0	0	0	0	0	0	0	0	0	0	0	0	0	0	0	0	0	0	0
gene-KI387_009135	HB-HD-ZIP	0.2	1.16	0.82	0	11.49	19.93	35.33	52.4	61.11	75.84	93.85	73.72	9.98	42	35.72	74.4	52.16	38.08	35.37	20.73	25.24	28.39	14.79	12.57	13.66	0.48	1.51	2.03	2.41	3.84	1.55	27.92	31.31	28.13	3.95	4.15	2.56	4.81	1.36	1.47	8.1	11.5	11.74	4.09	5.69	7.47
gene-KI387_009136	HB-HD-ZIP	1.39	0.96	1.14	0.17	3.82	6.96	38.62	13.18	55.62	11.79	95.51	15.94	14.82	16.18	10.86	16.95	37.36	39.04	30.68	17.11	15.33	14.21	7.97	8.05	6.08	2.36	4.22	4.25	13.55	14.62	14.97	7.08	7.49	4.19	10.55	7.58	8.57	10.14	14.7	15.01	9.35	9.6	11.82	2.3	2.29	1.63
gene-KI387_009389	GARP-ARR-B	5.38	22.54	15.01	11.64	5.18	3.76	1.9	3.9	3.85	4.37	5.99	12.26	2.15	7.54	17.21	11.07	11.24	14.53	11.12	9.04	7.45	7.36	12.59	10.68	10.5	31.62	29.93	32.73	36.01	32.82	40.26	12.58	13.42	13.49	43.37	34.7	32.37	50.04	46.77	58.95	15.98	14.95	12.37	19.62	20.57	17.15
gene-KI387_009406	MADS-MIKC	0	0.46	0	0	0	0	0	0	0	0	0	0	0	0	0	0	0	0	0	0	0	0	0	0	0	0	0	0	102.16	104.14	83.31	0	0	0	0	0	0	9.55	5.91	6.05	0	0	0	0	0	0
gene-KI387_009438	MADS-MIKC	0	0	0	0	0	0	0	0	0	0	0	0	0	0	0	0	0	0	0	0	0	0	0	0	0	0	0	0	0.59	0.44	1.97	0	0	0	0	0	0	0	0.93	0.25	0	0	0	0	0	0
gene-KI387_009509	bHLH	0.69	1.1	0.73	0.44	4.53	7.51	2.01	3.84	3.1	5.06	5.66	6.54	1.71	5.52	9.75	5.9	4.26	4.36	4.8	4.96	3.9	3.43	6.72	5.66	5.58	1.12	1.86	1.38	4.04	3.04	3.56	6.21	7.55	7.84	2.25	2.62	1.55	3.37	3.49	3.22	3.34	3.14	3.08	2.12	2.47	2.08
gene-KI387_009565	GRAS	0	0	0	0	2	2.89	4.18	4.14	9.3	6.53	1.87	11.97	0.25	1.4	12.03	10.62	4.64	4.31	5.58	5.99	3.49	2.33	0.71	0.14	0.38	0.17	0	0	2.78	1.42	1.47	0.07	0.83	0.19	0.07	0	0	0.24	0.25	1.01	0.26	0.58	0.25	0.07	0.24	0.19
gene-KI387_009567	NF-YA	23.77	11.92	18.26	17.79	5.16	15.48	25.52	39.78	33.66	36.49	47.14	49.01	58.05	60.94	83.85	43.15	11.65	11.85	6.12	14.68	15.34	10.48	27.41	27.91	20.68	18.23	20.86	21.58	53.06	48.76	55.66	29.52	40.12	50.04	19.2	8.62	34.94	25.36	33.91	16.29	36.36	41.3	41.33	43.42	32.76	45.05
gene-KI387_009681	C3H	50.14	30.56	24.06	32.7	18.91	42.21	72.65	49.77	47.1	47.9	41.87	58.86	69.58	56.37	74.32	59.88	36.37	38.67	35.6	32.74	28.65	26.04	44.69	38.73	46.06	58.01	48.48	57.94	52.18	45.69	51.68	48.71	51.67	49.44	56.62	58.43	53.96	63.63	64.27	62.32	35.85	48.95	47.66	36.28	41.49	41.28
gene-KI387_009724	AP2/ERF-AP2	0	0	0	0.67	0	0	0	1.92	0	0.76	0	0	0	1.33	0.8	1.01	0	1	0.24	0.87	0.35	0.19	7.66	5.86	5.66	0	0	0	0	0	0	3.87	3.06	3.46	0	0	0	0	0	0	0	1.85	4.28	0.4	0.35	0
gene-KI387_009783	C2H2	0	0	0	0	0	0	0	0	0	0	0	0	0	0	0	0	0	0	0	0	0	0	0	0	0.12	0	0	0	0.12	0.09	0	0	0	0	0	0	0	0	0	0	0	0	0	0	0	0
gene-KI387_009792	SBP	1.81	6.55	4	1.26	1.52	0.08	1.44	2.17	3.1	5.99	2.27	7.49	0.73	1.24	6.11	5.4	2.22	2.17	1.25	6.12	4.56	4.42	4.85	5.87	6.34	6.83	7.8	6.03	109.01	95.98	96.82	2.48	4.2	4.24	10.49	9.78	7.21	47.91	42.82	45.07	7.26	11.41	10.43	6.53	4.85	4.03
gene-KI387_009822	GARP-G2-like	14.29	19.48	16.95	14.36	16.13	24.56	12.26	13.98	11.71	11.39	11	14.46	16.21	17.15	22.88	15.74	13.94	18.35	14.96	9.88	9.45	7.47	15.38	13.17	13.61	21.78	23.45	21.93	19.13	17.79	18.65	17.7	16.48	17.51	19.9	20.08	22.42	21.63	22.07	24.19	18.23	20.64	17.13	24.06	23.04	22.82
gene-KI387_009866	C2H2	0	0	0	0	0	0	0	0	0	0	0	0	0	0	0	0	0	0	0	0	0	0	0	0	0	0	0	0	0	0	0	0	0	0	0	0	0	0	0	0	0	0	0	0	0	0
gene-KI387_009872	bHLH	25.56	47	33.28	21.61	17.95	21.76	49.18	72.65	61.85	60.71	62.91	78.34	41.05	50.37	93.62	72.13	103.7	113.24	106.82	83.77	81.92	54.39	46.14	44.91	39.48	18.14	20.8	29.41	42.76	44.04	38.75	56.44	52.35	47.5	30.65	27.39	30.61	43.01	51.61	48.07	55.56	68.74	69.26	80.1	70.56	73.1
gene-KI387_009987	AP2/ERF-ERF	163.93	215.55	305.15	129.3	275.69	256.6	141.16	158.33	155.78	144.28	166.28	199.04	167.59	153.09	232.43	198.01	442.84	550.6	386.54	275.44	291.74	308.67	362.23	360.52	369.03	462.58	409.05	533.54	191.07	179.58	195.44	322.88	330.54	329.48	522.68	522.05	533.37	459.59	426.18	433.04	455.59	318.96	330.66	207.08	210.15	196.93
gene-KI387_010075	GRAS	0	0	0	0.08	0	0.06	0	0	0	0	0	0	0.13	0	0	0	0	0	0	0.38	0.13	0	0.07	0	0	0	0	0	0	0	0	0	0	0	0	0	0	0	0.42	0	0	0	0	0	0	0
gene-KI387_010162	bZIP	41.16	88	63.45	31.07	55.09	39	94.99	67.28	91.75	67.82	72.88	93.16	97.52	69.5	97.92	98.56	108.12	124.64	109.86	82.6	97.53	73.45	98.84	110.22	118.32	207.55	153.49	143	136.45	140.57	133.55	89.68	91.25	93.07	161.04	167.54	197.22	580.93	627.58	670.61	306.83	191.32	190.44	87.44	77.16	69.99
gene-KI387_010206	GRAS	5.53	1.22	1	1.47	4.04	8.19	9.35	12.68	15.35	31.24	12.41	10.53	69.26	10.92	1.77	13.21	0	0.21	0.05	0.05	0.08	0.04	1.75	3.4	2.09	0.18	0.38	0.33	0.18	0.2	0	1.47	1.41	1	0.14	0.15	0.38	0.26	0	0	2.23	2.27	1.1	0.22	0.59	0.92
gene-KI387_010209	C3H	0.08	0	0	0.07	4.38	10.61	3.18	4.86	5.27	3.45	4.62	8.93	1.73	3.62	11.11	8.56	11.41	7.73	9.9	9.44	5.67	4.13	0.87	0.74	0.59	0	0	0	3.21	3.5	3.85	0.72	1.89	0.7	0.3	0	0	1.49	1.17	0.52	0.3	0.38	0.97	0.31	0.37	0.1
gene-KI387_010278	B3-ARF	3.53	4.64	1.58	4.73	0.92	1.71	1.31	0.87	2.54	1.33	2.35	2.2	0.67	1.04	1.89	2.27	1.86	1.77	1.38	1.32	1.07	1.01	8.88	6.57	9.15	16.02	15.61	15.47	52.75	50.01	51.51	3.93	3.09	4.04	16.5	21.43	14.96	48.01	46.61	59.3	4.86	5.67	5.59	2.54	2.87	2.31
gene-KI387_010294	AP2/ERF-ERF	1.66	8.84	0	0	1.11	4.05	0	0	0.79	0	0	0	0	0	0.25	0	0	0	0	0.31	0.12	0.66	852.41	838.64	776.69	59.35	129.35	15.64	809.39	700.42	729.85	64.54	56.98	60.76	225.79	471.75	262.84	15.54	11.05	5.3	715	442.17	474.18	312.96	293.51	339.54
gene-KI387_010296	LOB	0.31	0.6	0	2.94	0	0	0.96	0.61	0	2.04	0	1.15	0	0.57	2.12	0.66	0	0	0	0.26	0.41	0.66	0	0	0	0	0	0	0	0	0	0	0	0	0	0	0	0	0	0	0	0	0	0	0	0
gene-KI387_010305	AP2/ERF-ERF	2.56	8.38	0	0	1.25	7.45	0.7	0.81	1.44	0.49	1.14	1.2	0.74	1.33	0	1.06	1.58	0.93	0.62	1.66	1.46	0.68	82.35	77.09	71.69	46.66	44.45	8.38	330.08	351.53	378.56	8.22	8.47	8.01	67.68	146.96	67.56	4.22	7.58	4.35	93.39	55.18	67.25	27.85	22.45	32.06
gene-KI387_010310	AP2/ERF-ERF	122.55	5.24	0.17	0	0.86	0.85	10.61	2.76	18.78	0.27	33.07	3.25	3.25	0.96	0	5.07	0.6	0.78	0.38	0.52	0.7	2.2	81.1	64.82	67.28	15.88	25.56	2.6	121.36	144.95	135.21	6.47	9.81	4.94	18.46	66.52	13.11	3.51	3.33	1.2	145.58	113.32	116.42	13.45	14.55	14.69
gene-KI387_010314	AP2/ERF-ERF	0	9.26	0	0	0.6	2.25	0.39	0	0	1.09	2.94	0.57	1.63	0.42	3.05	4.83	0.98	0.58	0	1.27	1.62	0.37	3.82	9.12	9.02	0	0	0.33	6.23	5.76	15.11	2.1	1.1	1.48	2.62	13.27	3.34	0	0.35	0	4.4	5.8	5.2	2.66	3.35	1.78
gene-KI387_010315	AP2/ERF-ERF	0	0	0	0	0	0	0	0	1.93	0	1.65	2.57	0.29	0	0	0	0	0	0	0	0.95	1.38	6.34	8.71	3.67	0	2.45	0	10	10.35	1.62	0.73	0	0	1.16	3.07	0	0	0	0	5.64	0	1.96	0	0	0
gene-KI387_010319	AP2/ERF-ERF	0.36	1.44	0	0	0.18	0	0	0	1.15	0	0.52	0.35	0	0	0	0	0.21	0.96	0.33	0.15	0.11	0.33	16.5	11.17	5.05	0.89	7.06	0.23	14.69	21.99	18.91	0	0	0.64	9.51	16.18	9.58	0	0	0.26	17.82	9.97	11.62	1.29	3.31	2.5
gene-KI387_010320	AP2/ERF-ERF	0	0.99	0	0	0.1	0.37	0.43	0	0.39	0	1.49	0	0	0	0	0	0.93	0.56	0.47	0.22	0.49	0.28	9.61	7.77	8.13	1.46	2.6	0.32	8.67	11.27	15.41	0.83	0.69	0.63	5.81	14.06	5.45	0	0.22	0.12	15.19	13.14	13.48	3.21	4.2	4.08
gene-KI387_010321	AP2/ERF-ERF	0	0.63	0	0	0.18	0	0.31	0	0.96	0	0.85	0	0.26	0	0	0	0.42	0.44	0.22	0.71	0.29	0.15	12.29	8.8	15.73	0.26	2.2	0	18	21.85	27.36	0.92	1.21	1.21	2.78	13.5	6.38	0	0	0	21.85	20.06	14.48	5.62	5.53	2.43
gene-KI387_010322	AP2/ERF-ERF	1.17	89.67	0.14	0.29	2.12	14.23	3.88	0.27	10.31	0.21	51.21	7.22	0.77	1.97	0.22	8.35	10.6	6.52	7.21	15.33	20.7	16.97	31.76	28.04	26.92	11.16	54.68	4.16	265.19	394.51	409.18	3.29	6.66	2.78	109.39	337.39	92.48	3.38	12.23	4.55	74.15	49.25	65.45	14.98	10.98	15.84
gene-KI387_010327	AP2/ERF-ERF	0	0.32	0	0	0.76	12.98	2.74	0.67	1.75	11.39	15.76	13.83	1.42	4.81	0	24.3	0	0	0	0.27	0	0	39.35	43.58	38.63	6.17	7.12	3.08	25.64	14.64	17.13	13.46	12.95	9.44	6.33	17.21	6.35	2.37	0.94	0	93.96	68.04	69.75	30.85	41.72	40.3
gene-KI387_010368	Tify	4.45	55.94	2.8	72.79	68.21	383.83	327.12	137.61	312.63	158.34	398.69	170.09	313.36	143.14	330.66	162.83	105.19	102.37	124.53	63.67	88.28	87.76	82.98	78.15	100.02	17.35	34.67	23.94	77.17	69.51	67.68	75.99	63.04	65.31	36.29	19.64	21.85	99.07	131.9	145.71	80.23	64.56	58.74	39.52	36.46	38.66
gene-KI387_010447	MYB	4.2	71.1	13.14	37.51	7.8	6.06	18.43	12.24	33.26	12.95	85.73	39.94	6.79	14.33	129.17	40.78	14.26	18.61	13.88	23.81	26.56	19.25	20.42	28.78	28.39	8.59	11.72	8.37	37.7	34.01	33.55	25.73	34.34	27.74	25.21	23.81	13.64	11.3	30.94	41.8	3.61	8.56	11.27	13.11	7.32	10.73
gene-KI387_010460	MYB	0.08	0.08	0.06	0.07	0.14	0	0	0	0	0	0	0	0	0	0	0	0	0	0	0	0	0	0	0	0	0	0.1	0.1	0	0	0	0	0	0	0	0	0	0	0.1	0	0	0	0	0	0	0
gene-KI387_010485	LOB	0	1.52	0	0	1.17	12.75	0	0	0	0	0	0	0	0	0	0	0	0	0	0	0	0	0	0	0	0	0	0	0	0	0	0	0	0	0	0	0	0	0	0	0	0	0	0	0	6.3
gene-KI387_010535	NF-X1	0	0	0	0	0	0	0	0	0	0	0	0	0	0	0	0	0	0	0	0	0	0	0	0	0	0	0	0	0	0	0	0	0	0	0	0	0	0	0	0	0	0	0	0	0	0
gene-KI387_010555	C2C2-Dof	0	0	0	0	0	0	0	0	0	0	0	0	0	0	0	0	0	0	0	0	0	0	0	0	0.4	0	0	0	0	0	0	0	0	0	0	0	0	0.42	0	0	0	0	0	0	0	0
gene-KI387_010573	bHLH	1.06	0.79	0.33	0.91	2.79	0.23	0	0.12	0	0.28	0	1.36	0.08	0	0	0.72	8.09	9.64	9	2.07	2.45	1.78	4.21	4.28	3.75	0.46	0.67	1.65	4.86	4.7	3.22	25.94	20.97	29.02	1.4	1.11	3.26	3.56	3.23	4.35	3.33	4.06	2.78	37.55	29.12	38.54
gene-KI387_010580	MYB-related	0	0	0	0	0	0	0	0	0	0	0	0	0	0	0	0	0	0	0	0	0	0	0	0	0	6.61	7.53	7.19	2.96	4.09	3.46	0	0	0	15.09	6.67	3.89	8.89	4.51	5.21	0	0	0	0	0	0
gene-KI387_010581	MYB	0	0	0	0	0	0	0	0	0	0	0	0	0	0	0	0	0	0.12	0.15	0	0	0	0.28	0.23	0	0.95	1.2	2.03	3.02	4.49	4.71	0	0.89	1.58	0.67	1.17	0.61	4.38	3.25	1.87	0	0	0.21	0.23	0	0
gene-KI387_010589	MYB	12.42	37.05	21.62	19.77	5.67	3.3	67.22	11.71	148.18	15.89	283.97	43.86	13.4	8.33	69.21	40.2	0.15	0.36	0.29	0	0.43	0.23	0	0	0	0.19	0	0	0.27	0.2	0.79	0	0	0	0.22	0.68	0.98	0.27	1.68	4.98	1.95	5.15	3.93	0.22	0	0
gene-KI387_010591	MYB	1.93	7.04	14.64	6.43	2.78	0	3.25	4.43	11.97	1.01	25.96	1.87	0.46	1.17	0.52	3.65	0	0	0.35	0	0	0	1.67	1.67	2.48	0	0.24	0	6.22	5.85	4.9	1.09	1.88	0.81	0.54	1.41	0.97	0.65	1.55	3.35	0.8	2.99	2.79	0.28	0.49	1.05
gene-KI387_010635	bZIP	0	0	0	0	0.18	0.89	0	0	0	0	0.56	0	0	0	0	0	0	0.24	0	0	0	0	0	0	0	0	0	0	0	0	0	0	0	0	0	0	0	0	0	0	0	0	0	0	0	0
gene-KI387_010636	NAC	0	0	0	0	0	0	0	0	0	0	0	0	0	0	0	0	0	0	0	0	0	0	0	0	0	0	0	0	0	0	0	0	0	0	0	0	0	0	0	0	0	0	0	0	0	0
gene-KI387_010672	AP2/ERF-ERF	59.7	0.74	4.35	13.77	14.7	3.46	32.97	115.38	7.8	56.21	50.14	37.22	24.61	95.28	64.39	61.83	58.84	84.58	37.05	19.32	30.12	16.24	267.62	260.23	268.71	1.29	1.44	0	1.82	5.36	7.18	0	1.65	0	2.95	0	1.52	66.82	28.1	60.26	150.3	227.45	207.64	0	0	0
gene-KI387_010673	AP2/ERF-ERF	73.44	2.59	10.9	5.05	14.5	2.47	10.42	42.81	12.1	50.81	34.28	46.76	26.04	60.23	43.17	60.06	19.74	35.17	15.09	17.1	13.58	8.54	92.73	105.27	106.61	0	0	4.06	12.19	11.47	4.28	0	0	2.87	0.9	0	1.77	65.12	44.86	57.39	90.47	132.87	112.75	0.99	2.56	3.53
gene-KI387_010676	MADS-M-type	0	2.11	0	0	0	0.27	0	0	0	0	0	0	0.48	0	0	0	0.77	0.3	0.73	0	0.41	0.14	0	0	0	0	0	0	0	0	0.26	0	0.28	0	0	0	0	0	0	0	0	0	0	0	0	0
gene-KI387_010679	MADS-M-type	0	0	0	0	0	0	0	0	0	0	0	0	0	0	0	0	0	0	0	0	0	0	0	0	0	0	0	0	0	0	0	0	0	0	0	0	0	0	0	0	0	0	0	0	0	0
gene-KI387_010682	bZIP	65.03	106.42	89.46	93.15	87	128.83	90.78	145.88	98.21	160.78	131.86	163.14	112.37	154.12	147.03	158.68	84.82	90.89	90.23	92.68	94.15	100.86	70.23	75.53	71.17	76.39	97.22	83.6	87.77	98.2	86.99	90.85	95.19	90.99	66.51	74.78	76.64	98.54	92.19	87.25	96.72	79.58	86.76	110.59	110.36	112
gene-KI387_010807	MYB-related	0	0	1.08	0	6.04	0.86	0	0	6.94	33.85	5.84	10.47	6.25	7.63	0	47.64	3.83	0	10.25	1.12	0	0	38	23.07	23.01	12.52	21.51	25.13	21.76	0	7.11	25.22	33.89	20.56	58.97	78.18	19.43	0	0	0	29.22	14.63	24.51	29.86	27.85	34.02
gene-KI387_010809	MYB	6.96	20.43	4.6	14.15	23.7	0.23	21.06	13.36	38.83	6.72	49.2	7.21	8.17	6.91	7.52	6.2	8.02	2.49	2.68	0.76	0.76	2.11	207.64	217.45	224.39	11.22	9.06	10.18	5.51	6.42	4.37	335.39	319.15	333.68	15.21	13.73	17.63	13.6	10.02	16.38	201.29	179.42	190.56	543.91	506.2	548.19
gene-KI387_010834	C2H2	3.89	5.16	4.29	5.27	8.6	9.73	10.25	12.72	6.91	9.26	2.12	10.93	13.2	14.39	11.26	10.22	7.01	6.45	5.8	6.27	4.09	4.18	7.36	7.28	5.94	5.29	5.92	7.45	8.76	7.31	6.9	9	7.39	8.33	8.23	7.37	6.59	5.91	6.5	7.17	7.46	8.33	7.68	8.28	9.27	7.38
gene-KI387_010836	C2C2-GATA	2.96	43.11	2.85	6.2	0.64	0	0	0	0	0	0	0	0	0	0	0	3.36	0.61	1.71	6.92	4.52	7.81	0.98	0.4	0.45	13.57	13.34	19.61	11.87	19.05	15.02	2.38	2.75	1.58	24.88	15.27	17.53	3.78	3.74	2.84	0	0.48	0.73	2.44	4.3	5.33
gene-KI387_010838	AP2/ERF-ERF	0	0.58	0.37	0	0	0	0	0	0	0	0.19	0.28	0	0	0	0.49	0.29	1.04	0.69	0.76	0.51	1.3	0	0.21	0	0.87	2.01	1.67	2.51	4.49	2.81	0	0	0	3.3	8.59	3.15	3.02	0.79	2.14	1.23	0.51	0.2	0	0	0
gene-KI387_010937	MYB	0.97	0	0.18	0	0.53	0.3	0.41	0.63	0.14	0	0.13	0.19	0.92	0.44	0.13	0	0	0.66	0.2	0	0.07	0.08	1.07	0.3	0.17	0.12	0.51	1.04	0.88	0.66	0.39	0.3	0	0.29	1.74	1.5	2.33	1.06	1.12	0.9	0	0.54	0.14	0.15	0.13	0.85
gene-KI387_010943	C3H	0	0	0	0	0	0	0	0	0	0	0	0	0	0	0	0	0	0	0	0	0	0	0	0	0	0	0	0	0	0	0	0	0	0	0	0	0	0	0	0	0	0	0	0	0	0
gene-KI387_010952	Trihelix	8.5	16.5	15.86	12.66	4.13	9.99	12.52	20.82	12.84	18.85	15.24	23	14.32	20.24	24.38	20.28	32.58	35.14	32.61	23.61	25.72	26.75	25.31	28.69	28.79	27.33	30.81	28.56	28.69	23.57	23.78	28.88	31.5	31.59	28.26	29.79	33.11	36.13	30.74	30.66	56.47	61.91	67.14	73.39	59.22	65.26
gene-KI387_010973	MYB-related	1.28	2.09	0.52	0.99	1.16	0.44	1.16	3.84	2.55	2.45	0.15	3.4	3.07	3.04	3.6	3.41	3.12	2.94	2.7	2.91	2.09	0.92	1.91	4.86	1	0.44	1.38	0.93	2.95	2.04	1.57	3.52	4.61	2.93	2.42	2.15	1.86	2.11	2.83	3.4	0.69	2.37	1.15	1.95	1.58	2.03
gene-KI387_011044	MYB	0	0	0	0	0	0	0	0	0	0	0	0	0	0	0	0	0	0.28	0.33	0	0	0	0	0	0	0	0	0	9.09	14.22	11.89	0	0	0	0	0	0	66.12	52.32	62.53	0	0	0	0	0	0
gene-KI387_011089	LOB	0	1.32	0.2	0.11	5.53	0.09	4.81	5.96	12.01	4.16	9.98	12.53	3.11	4.85	14.57	10.51	23.38	34.15	19.95	22.78	28.5	14.59	5.79	8.23	8.36	0.28	0.3	0	0	0.15	0.76	8.74	7.64	6.87	0	0.87	0.15	0.82	1.3	2.79	7.51	5.67	7.04	4.65	3.07	3.96
gene-KI387_011090	LOB	0.12	0	0	0	32.82	0	0.15	1.54	2.11	0.82	0.41	3.43	0	0.48	2.92	3.74	69.2	105.02	39.4	119.68	114.39	62.73	0.95	1.13	0.9	0	0	0	0	0	0.14	9.65	6.74	9.28	0.16	0	0	0.19	0	0.32	1.08	0.97	0.89	2.54	1.56	1.37
gene-KI387_011091	LOB	23.45	4.28	8.11	11.38	36.27	2.91	132.79	146.72	165.65	129.16	188.95	127.4	95.14	153.93	129.18	157.22	52.79	91.07	35.71	41.21	44.31	29.49	386.55	374.67	451.34	7.32	11.57	11.87	60.22	47.9	34.03	106.31	98.88	89.17	4.71	7.4	2.78	286.54	179.21	226.98	301.46	334.84	293.02	39.48	28.59	33.19
gene-KI387_011095	AP2/ERF-AP2	0	0.37	0.16	0.82	1.83	0	0	1.25	0.83	0.75	0.49	0.74	0	1.45	0.51	0.66	1.11	1.02	0.87	1.6	1.94	1.64	0.33	0	0.61	0	0.71	2.15	6.16	7.71	4.85	0.27	0.27	1.34	1.86	2.79	0.24	1.94	2.56	1.93	0	0	0	0	0	0
gene-KI387_011482	MYB-related	0	0	0	0	0	0	0	0	0	0	0	0	0	0	0	0	0	0	0	0	0	0	0	0	0	0	0	0	0	0	0	0	0	0	0	0	0	0	0	0	0	0	0	0	0	0
gene-KI387_011571	B3	0	0	0	0	0.36	0	0	0	0	0	0	1.17	0	0	0	0.35	0.39	0.3	0.18	0	0	0	0	0.29	0	0	0	0	0.34	1.26	1.01	0	0	0.56	0	0	0	0.34	0	0.87	0	0	0	0	0	0
gene-KI387_011572	B3	0	0	0	0	0	0.13	0	0	0.28	0.75	0	0	0	0	0	0.33	0.19	0.29	0.18	0.32	0.13	0	0.67	0.83	0.31	0	0	0	1.31	1.94	1.22	0.55	0.27	0.27	0	0	0.24	0.98	0.52	1.39	0.27	0	0	0.28	0	0
gene-KI387_011673	CPP	2.21	3.05	2.64	3.29	1.9	1.73	5.01	4.82	4.58	5.97	2.45	4.77	4.33	3.45	5.16	4.67	4.07	4.74	3.88	4.57	4.28	2.92	6.89	7.66	8.79	6.22	5.75	6	3.62	4.72	4.98	6.89	7.18	6.69	6.49	7.72	4.45	8.48	8.73	7.21	8.74	14.55	13.16	8.77	8.73	9.35
gene-KI387_011684	AP2/ERF-ERF	0	0.17	0	0	0	0.03	0	0	0	0	0	0	0	0	0	0	0	0	0	0	0	0	3.36	1.72	2.56	0.05	0.3	0.31	0.96	0.51	0.56	0.92	0.28	0.84	0.11	0.81	0.3	2.01	1.86	0.82	0.85	1.21	1.25	0.34	0.62	0.17
gene-KI387_011874	AP2/ERF-ERF	0.18	0	0.45	0	0	0	4.89	0.6	4.76	1.43	7.11	1.06	1.96	0	0.99	0.31	0.18	0	0	0.15	0.75	0.13	0	0.27	0	0.22	0.46	0.92	2.19	0.93	0	0.26	0.51	0	0.26	1.34	0.7	0	0	0	0	0.32	0.73	1.85	0.47	0.75
gene-KI387_011875	AP2/ERF-ERF	43.27	17.88	2.1	6.67	0	0	303.8	0	136.5	0	16.7	0	18.49	0	0	0	0	0	0	0	0	0	0	9.34	0	0	0	0	0	0	0	0	0	0	0	0	0	0	0	0	27.58	20.47	0	0	0	0
gene-KI387_011879	AP2/ERF-ERF	162.18	5.51	1.36	24.71	118.65	347.28	1169.11	359.66	1466.09	348.15	1414.86	290.54	516.88	153.73	123.33	282.34	96.57	67.32	83.42	78.78	71.87	93.1	24.4	25.66	16.85	9.27	20.81	17.48	3.74	8.96	4.37	9.73	9.59	8.27	9.53	24.82	8.72	26.9	28.8	20.57	74.68	54.74	55.21	7.09	5.64	5.34
gene-KI387_011882	AP2/ERF-ERF	12	0.21	0	0	0.07	0	6.53	0.48	7.42	0.39	10.73	0.38	1.76	0.3	0.13	0.17	0.11	0	0.3	0	0	0.32	59.46	71.62	69.57	8.73	7.3	3.06	52.62	32.91	38.74	8.41	8.13	7.04	9.43	8.09	6.45	5.22	4.69	1.68	253.28	159.43	175.31	27.25	24.69	26.89
gene-KI387_011889	AP2/ERF-AP2	0.51	14.08	4.47	5.62	0.05	0	0.94	0	0.43	0.19	1.46	0.57	0	0.22	0	0.5	2	1.24	1.25	0.29	0.7	0.8	3.99	4.7	5.61	77.04	67.29	74.19	36.76	49.78	49.49	0.69	2.65	1.23	153.75	226.53	120.56	55.3	49.3	55.44	14.79	6.22	9.35	3.78	1.33	2.76
gene-KI387_011923	HB-HD-ZIP	20.48	41.09	19.09	37.55	16.07	0.4	0.69	1.93	0.97	1.91	2.09	4.28	1.95	3.61	6.72	4.13	13.9	13.86	16.4	7.94	10.64	7.61	19.96	16.52	19.18	23.7	33.07	24.48	41.65	40.14	41.56	25.39	25.87	29.14	41.75	39.63	32.1	20.28	20.5	23.67	5.89	8.5	8.05	13.95	14.37	13.3
gene-KI387_011931	GARP-G2-like	0.53	2.91	1.55	1.55	0.74	1.22	0.46	0.42	0.47	1.02	1.88	2.63	0	0.1	2.66	3.86	0.82	0.75	0.69	1.47	1.86	1.32	0	0	0	3.87	3.68	5.2	1.82	2.08	2.34	0	0	0	3.38	2.05	1.86	0.85	2.4	1.65	0	0	0	0	0	0
gene-KI387_011956	MYB	10.21	6.05	1	3.78	17.46	7.99	15.25	51.84	21.87	33.08	29.73	19.34	62.4	41.25	11.12	18.63	2.08	2.44	1.35	0.62	1	0.41	14.61	15	16.75	0.55	0.67	1.95	0.13	0.49	0.2	2.75	2.97	1.93	1.94	0.78	0.86	1.05	2.81	1.67	11.92	16.39	16.58	1.98	1.47	2.22
gene-KI387_012003	Tify	2.22	3.33	2.71	0.95	1.56	0.66	1.54	1.04	3.4	2.67	1.6	1.53	1.31	3.83	1.52	2.19	1.33	1.78	1.64	1.84	1.21	0.98	3.83	3.11	1.39	0.34	2	1.63	6.88	6.75	6.11	3.9	2.44	4.71	6.03	3.64	1.48	3.91	1.55	3.99	4.56	2.45	6.05	6.32	7.42	8.08
gene-KI387_012048	bHLH	1.38	0	0.14	1.48	11.26	0	12.32	11.6	15.82	13.2	19.92	21.86	5.82	15.9	12.47	22.59	3.19	2.38	2.22	9.28	5.98	4.84	0.59	0.25	1.93	6.48	5.75	5.81	2.04	2.82	3.05	0	0.95	0.24	10.5	6.74	6.47	1.16	2.3	2.98	0.24	0.89	0.68	0	0.66	0.23
gene-KI387_012081	C2C2-GATA	0	0	0	9.2	0	0	0	0	0	0	0	0	0	0	0	0	0	0	15.34	0	0	8.04	0	0	0	0	0	0	0	0	0	0	0	0	0	0	0	0	0	0	0	0	0	0	0	0
gene-KI387_012082	Tify	2.96	11.8	7.39	8.31	9.23	12.06	17.56	24.68	16.22	17.25	20.03	23.85	13.5	14.03	23.31	25.6	11.17	12.36	15.68	12.24	13.83	12.43	7.2	11.4	9.71	5.41	8.58	8.72	13.35	16.41	15.42	7.44	6.86	8.93	9.49	9.3	8.52	12.03	18.82	18.93	5.62	5.69	4.69	8.61	7.5	9.49
gene-KI387_012114	C3H	3.17	2.87	1.98	3.04	2.73	2.06	6.09	5.39	3	3.38	3.2	3.63	5.17	5.28	5.49	4.36	2.71	3.42	2.26	2.17	2.6	3.07	2.67	2.34	2.25	6.69	6.57	6.51	4.61	3.07	2.74	2.08	2.24	2.81	5.32	5.44	4.82	7.48	7.2	6.69	3.81	4.19	2.52	1.92	1.76	1.03
gene-KI387_012164	AP2/ERF-ERF	12.06	25.8	7.13	52.91	44.11	107.1	56.66	106.94	24.65	129.86	60.79	67.92	67.89	79.7	47.95	77.45	0.44	1.74	2.1	26.14	20.35	24.42	98.62	75.29	108.48	36.42	33.21	14.05	40.68	28.34	27.95	64.72	51.53	59.15	15.62	17.19	22.15	20.63	21.35	21.96	137.21	101.22	101.77	286.68	250.43	265.42
gene-KI387_012165	AP2/ERF-ERF	86.75	142.79	53.3	194.71	117.79	78.49	147.85	120.56	97.17	105.04	83.72	74.89	237.99	117.98	84.95	74.44	62.49	56.56	67.68	85.5	89.76	86.21	34.58	34.26	37.52	42.88	30.92	20.89	18.34	27.66	12.56	59.21	55.41	74.53	12.51	10.4	15.35	24.09	15.77	13.16	66.73	62.81	56.71	117.73	105.13	117.39
gene-KI387_012166	AP2/ERF-ERF	23.57	3.24	3.21	3.18	6.58	44.93	56.81	36.83	91.9	18.04	67.75	25.05	30.58	30.7	23.01	16.53	18.82	18.25	16.51	38.84	41.89	44.1	11.28	8.12	8.11	9.39	6.2	4.66	3.08	6.23	5.79	11.26	9.41	9.87	1.24	2.45	1.07	6.85	15.81	2.41	9.06	7.49	4.77	4.24	6.01	3.36
gene-KI387_012197	MYB-related	3.47	6.23	4.52	3.89	2.16	2.33	5.76	8.51	5.29	6.04	4.54	7.28	7.98	8.34	11.41	5.84	5.87	6.11	4.59	4.02	3.52	3.3	5.64	7.93	7.85	8.81	7.64	8.26	8.98	9.47	9.94	9.67	10.58	10.77	7.83	6.55	6.23	18.52	12.69	16.26	6.88	8.62	8.26	9.76	8.85	7.69
gene-KI387_012289	E2F-DP	0.06	0	0	0	0	0	0.35	0.88	0.78	1.22	0.39	1.23	0.23	0.75	1.16	1.75	0.69	0.99	0.32	0.49	0.72	0.34	0.65	0.8	0.88	0.06	0	0.07	1.86	2.49	1.72	0.54	0.52	0.6	0	0.08	0.2	2.15	2.06	1.81	0.38	0.19	0.36	0.39	0.28	0.3
gene-KI387_012321	B3	2.68	1.79	5.59	0.94	9.91	8.78	9.93	15.58	18.92	17.52	8.73	27.69	4.39	16.14	18.27	25.11	20.09	18.91	19.81	13.23	11.94	7.35	6.94	7.09	7.97	5.35	7.72	8.15	37.45	36.95	42.89	12.25	13.11	15.06	8.23	6.15	5.78	31.18	31.06	27.12	7.92	13.65	12.01	15.25	17.33	14.02
gene-KI387_012355	C2H2	0	0	0	0	0	0	0	0	0	0	0	0	0	0	0	0	0	0	0	0	0	0	0	0	0	0	0	0	0	0	0	0	0	0	0	0	0	0	0	0	0	0	0	0	0	0
gene-KI387_012537	GRAS	4.06	24.48	6.74	1.93	9.4	10.93	0.61	2.91	1.53	3.02	2.5	4.21	1.1	6.5	16.68	3.65	19.43	19.57	19.93	30.22	22.91	21.95	10.74	11.48	13.07	7.45	6.54	7.29	13.53	15.54	16.64	46	46.12	51.8	12.26	10.33	12.44	19.41	19.34	18.59	11.18	8.23	9.19	30.47	29.17	29.14
gene-KI387_012576	MYB	0.56	0.51	0.57	0.43	2.67	3.36	6.22	10.94	9.8	9.22	3.79	10.78	2.76	5.94	12.97	11.85	9.8	8.79	7.92	8.65	6.99	5.73	20.94	21.1	19.85	5.63	4.37	5.43	10.83	6.97	7.27	25.56	26.13	26.29	3.84	3.53	3.13	6.1	7.1	8.26	16.2	19.95	19.07	14.93	14.77	12.96
gene-KI387_012598	NF-YA	11.71	30.11	17.72	21.92	1.48	1.04	7.46	7.22	6.2	8.89	14.5	10.97	10.66	11.9	14.83	8.85	6.24	6.55	6.86	8.36	9.62	6.96	110.05	97.76	98.76	34.71	51.89	58.87	154.32	157.62	155.05	68.27	68.28	85.7	82.28	82.32	49.84	120.89	127.13	124.94	98.57	110.83	100.33	113.7	106.4	111.67
gene-KI387_012599	HB-HD-ZIP	2.49	13.79	3.52	0.57	8.59	4.27	4.23	10.88	8.57	9.64	9.08	12.58	4.06	9.56	8.5	12.06	45.56	56.23	45.87	37.24	29.7	25.19	105.19	101.92	104.59	21.41	18.21	21.46	43.7	42.57	42.54	147.11	158.5	155.46	29.34	30.59	19.01	74.88	53.44	52.39	41.5	100.16	94.98	242.43	258.95	232.97
gene-KI387_012605	SBP	1.85	26.04	6.99	1.99	2.54	0.06	0	0	0	0	0	0.47	0	0.12	0	0.69	17.8	24.43	16.59	6.26	6.7	6.24	2.26	2.7	2.99	10.63	14.23	14.32	24.9	24.37	25.74	8.15	5.57	7.71	15.02	14.38	16.78	65.57	50.7	54.03	5.39	3.24	3.87	10.54	9.18	10.51
gene-KI387_012611	SBP	5.76	23.63	5.96	2.76	0.2	0	0	0	0.24	0.21	0.21	0	0	0.5	0	0.85	0.82	0.65	0	0	0.23	0.24	1.16	0.48	0.54	13.07	12.06	7.57	38.72	41.1	45.08	0	0.23	0.7	14.47	10.98	13.27	29.01	23.38	20.84	0	0.58	0.66	0	0.64	0.23
gene-KI387_012620	C2C2-GATA	3.5	2.94	0.79	1.85	8.88	13.91	14.23	20.19	31.49	19.73	66.28	28.3	3.41	43	124.13	27.68	17.98	19.24	18.95	34.12	29.47	20.05	148.37	145.95	157.42	6.38	5.52	2.39	37.97	29.99	36.41	9.49	11.63	9.72	5.39	5.05	3.74	20.37	17.59	12.47	194.4	195.15	183.94	35.28	36.86	38.86
gene-KI387_012646	GRAS	0	0.23	0	0	0	0.55	0	0	0	0	0	0	0	0	0	0	0	0	0	0.24	0.1	0	0	0	0	0	0	0	0.23	0	0	0	0	0	0.28	0	0	0	0	0.28	0	0	0	0	0	0.17
gene-KI387_012694	bHLH	0	0	0	0	0.58	0.06	0.19	0.34	1.79	0	0.81	0.53	0	0.21	0.45	0.47	3.52	1.59	2.27	15.69	13.75	11.91	13.73	15.28	15.72	0	0.93	0.09	106.34	97.68	96.51	2.25	0.93	1.57	0	0.11	0	11.31	7.3	5.77	4.5	6.87	6.43	0.86	0.96	0.72
gene-KI387_012794	C2C2-CO-like	6.48	18.78	19.43	37.1	3.23	0	0	0	0	0	0	0	0	0	0	0	0.48	0.27	0	0	0	0	1.92	2.23	1.93	101.8	67.33	70.3	32.04	33.05	27.28	3.77	2.81	2.11	47.6	39.51	49.88	111.75	108.47	86.58	0.09	0	0	1.22	1.6	2.54
gene-KI387_012823	NAC	0.88	0.67	0.86	0.6	4.12	44.81	6.35	20.68	12.04	28.09	12.74	40.2	9.8	18.46	8.69	42.25	5.67	5.51	4.99	3.55	2.99	2.29	8.51	7.64	8.34	0.79	1.33	1.47	0.14	1.16	0.74	11	11.18	11.65	1.04	1.44	1.45	0.28	1.01	0.6	4.16	10.2	9.64	8.04	9.39	8.32
gene-KI387_012824	NAC	0	0	0	0	0	0	0	0	0	0	0	0	0	0	0	0	0	0	0	0	0	0	0	0	0	0	0	0	0	0	0	0	0	0	0	0	0	0	0	0	0	0	0	0	0	0
gene-KI387_012871	NAC	0.07	2.08	1.68	2.24	2.09	22.16	32.28	35.47	27.22	26.79	39.99	46.41	19.56	37.49	97.66	53.32	26.32	32.91	26.22	37.12	35.07	31.72	27.82	23.31	30.13	1.24	1.77	2.25	2.71	2.56	3.01	11.52	13.74	14.09	1.12	1.05	0.54	0.68	0.78	1.05	4.52	6.17	6.02	1.87	1.68	1.27
gene-KI387_012873	NAC	0	0.19	0	0.74	0.23	0	7.46	5.89	7.39	0	3.89	15.85	7.11	7.32	8.43	3.82	8.66	4.82	6.86	10.5	12.74	1.91	5.9	0	1.45	0.03	1.65	0	0	1.36	1.28	4.65	0	7.12	0.79	0	0.43	0	0.04	0	0	0	0	0.23	0	0.81
gene-KI387_012882	MYB-related	59.87	46.03	39.85	60.34	41.76	103.92	90.54	72.58	98.77	68.89	95.24	89.49	71.99	68.4	108.75	86.27	29.98	32.36	32.7	39.35	38.1	34.78	145.55	148.58	152.23	104.98	91.37	81.74	110.03	78.9	91.66	93.41	86.69	92.51	93.31	110.54	69.9	72.92	66.56	54.36	207.45	197.78	193.94	143.03	157.18	146.56
gene-KI387_013046	GARP-G2-like	9.2	10.22	8.72	10.47	13.03	31.05	9.29	11.8	13.24	16.66	9.05	21.21	11.84	12.9	10.99	19.67	16.98	22.8	17.55	15.06	13.23	11.11	13.07	12.04	12.04	8.15	7.89	12.1	12.83	14.14	13.25	3.78	3.48	3.89	15.95	13.12	11.89	12.25	20.33	25.76	11.08	12.8	10.14	4.06	4.1	4.8
gene-KI387_013141	E2F-DP	2.03	1.96	1.17	1.16	2.16	4.11	16.4	11.69	22.15	16.18	9.01	23.91	10.06	12.48	18.27	24.83	25.79	19.85	21.71	17.25	15.26	9.56	6.89	7.26	6.2	2.43	3.75	2.86	6.28	8.01	6.72	11.51	12.93	12.78	3.37	3.58	2.55	8.24	8.51	9.74	6.12	7.35	8.24	11.09	10.72	9.73
gene-KI387_013147	MYB-related	31.72	46.78	41.72	48.24	46.17	55.67	31.7	63.91	48.11	61.81	62.2	84.98	31.76	68.38	93.47	84.94	110.43	105.36	106.08	88.07	83.98	83.2	89.47	95.77	88.19	84.1	79.08	95.36	51.99	51.95	53.39	100.99	95.38	98.28	73.9	75.63	72.44	75.42	67.65	80.14	88.62	92.01	83.64	108.73	100.45	105.77
gene-KI387_013171	C3H	4.33	6.24	4.12	5.11	7.62	8.69	9.75	13.67	10.71	14.26	5.77	16.95	11.69	17.74	22.08	17.97	11.21	9.52	11.21	8.55	7.67	7.59	14.31	12.43	13.58	9.49	9.39	9.94	12.65	10.53	11.07	18.86	21.87	20.28	10.23	11.2	8.71	14.58	14.09	13.44	19.62	14.25	12.56	24.28	22.45	19.73
gene-KI387_013224	WRKY	16.32	16.62	15.45	15.91	21.76	20.42	7.62	11.37	9.43	13.66	9.45	22.32	12.39	15.21	20.29	19.98	23.21	23.95	25.42	16.79	19.28	18.38	22.97	20.56	21.09	24.5	29.99	30.9	30.45	32.9	30.93	19.63	16.94	21.44	27.46	30.7	35.09	34.39	32.73	37.67	12.35	12.6	12.2	14.18	15.58	13.09
gene-KI387_013246	C2H2	18.84	11.7	9.78	14.17	6.29	4.62	16.91	13.84	11.98	10.94	10.58	10.99	17.3	15.39	18.98	10.02	9.46	9.37	9.17	9.57	8.75	6.23	12.34	12.89	12.95	11.84	9.23	13.14	9.2	8.2	8.29	15.13	15.48	14.23	13.54	14.29	12.52	13.21	14.35	12.73	7.65	14.85	13.5	13.61	14.22	14.63
gene-KI387_013266	MYB	0.85	2.69	1.72	2.79	2.8	4.72	4.41	6.16	6.17	5.02	2.34	8.61	1.53	3.8	8.45	8.19	8.16	8.43	8.17	6.81	4.89	4.12	11.32	12.11	12.93	5.26	5.71	5.32	12.72	12.5	12.2	17.05	15.54	19.26	6.77	7.05	4.2	12.93	12.38	12.71	6.97	12.25	10.5	16.19	16.55	14.37
gene-KI387_013292	MYB-related	4.76	5.22	8.11	5.34	6.81	10.56	2.83	1.94	0.82	2.29	1.73	2.42	2.68	4.86	5.47	5.44	13.59	15.11	13.73	13.44	9.95	9.84	8.81	6.85	7.15	19.64	18.25	18.51	17.73	17.77	17.6	7.66	6.99	6.88	19.47	16.59	18.57	21.09	26.6	30.5	8.16	8.12	6.35	5.49	4.11	3.88
gene-KI387_013323	GARP-G2-like	13.74	15.27	15.85	13.87	20.74	15.98	11.16	15.66	14.22	28.98	13.58	23.97	7.88	20.08	19.31	21.65	53.04	57.83	41.96	39.9	37.97	29.13	24.83	17.38	14.45	28.61	33.64	26.67	30.88	31.36	34.14	30.84	15.8	22.6	21.39	23.68	39.13	34.53	43.67	36.24	30.72	27.74	22.52	36.73	30.61	33.3
gene-KI387_013382	LOB	0.98	21.02	3.45	3.63	0.38	0.44	0	0	0	0	0	0	0	0.61	0	0	1.25	0.49	0.89	0.54	0.22	0.92	108.05	106.82	108.91	59.46	171.61	58.76	680.06	632.8	555.19	24.38	18.41	10.98	310.19	273.73	165.58	181.82	149.58	98.37	173.96	162.75	181.41	163.58	168.38	175.54
gene-KI387_013402	HB-other	0.52	0.29	0.36	0.13	0.12	0.27	0.08	0.2	0	0	0	0	0.15	0	0.07	0.21	0.29	0.51	1.21	0.56	0.4	0.53	0.61	0.51	0.46	0.08	0.61	0.08	0.74	0.36	0.7	0.31	0.29	0.2	0.18	0	0.27	0.1	0.56	0.3	0.2	0.63	0.28	0.2	0.36	0.1
gene-KI387_013411	GARP-ARR-B	5.9	15.67	10.36	6.28	7.98	6.9	9.88	7.3	11.78	15.45	17.07	35.42	15.92	13.77	33.13	30.97	12.36	14.05	14.32	11.11	10.12	9.38	4.15	3.66	3.31	11.57	14.34	15.23	14.84	14.69	13.57	6.53	7.94	7.19	14.25	12.31	15.08	14.3	15.06	16.57	2.34	2.16	2.79	8.02	6.14	6.93
gene-KI387_013416	C2H2	76.15	54.09	40.58	46.4	30.33	27.29	76.35	53.82	59.02	72.22	60.04	87.47	73.19	56.41	72.99	84.8	31.05	37.14	26.17	33.14	29.37	28.15	44.18	43.18	43.24	60.93	54.67	47.59	54.1	69.54	54.36	42.58	47.48	48.11	45	52.83	62.77	108.43	103.17	97.03	57.74	63.45	62.23	76.11	57.75	64.73
gene-KI387_013483	HB-BELL	0.47	0.74	0.7	0.66	4.99	0.44	0.27	4.56	0.35	0.56	0.22	3	0.11	3.13	0.69	2.4	6.43	7.73	6.92	4.23	3.25	2.63	5.7	4.99	4.41	1.77	1.83	1.85	8.33	7.87	7.43	2.4	2.15	2.48	1.98	1.64	2.45	5.21	4.37	3.81	1.9	1.49	2.26	2.38	1.83	2.35
gene-KI387_013587	NF-YA	0.68	1.32	2.24	2.23	0.25	0	0.18	0.21	0	0	0.5	0	0	0	0.34	0	0.27	0.73	0.5	0.58	0.84	0.59	4.8	5.21	6.43	2.83	5.92	1.84	88.43	96.16	92.52	6.62	7.53	6.3	2.6	2.89	2.33	16.52	21.81	22.51	9.21	12.25	10.4	13.89	9.48	12.37
gene-KI387_013817	bHLH	0.61	1.17	0.71	0.52	3.64	0.79	11.57	4.3	15.13	3.34	34.13	6.53	3.94	8.59	6.88	5.38	8.99	17.1	7.86	5.34	4.66	3.26	6.86	3.11	5.17	1.65	0.71	0.72	41.31	35.26	38.14	0.47	0.79	0.8	2.29	1.66	1.73	21.84	20	19.2	0.57	1.58	1.75	0.23	1.04	0.34
gene-KI387_013826	MYB	0	0	0	0	0	0	0	0	0	0	0	0	0	0	0	0	0	0	0	0	0	0	0	0	0	0	0.19	0	2.09	1.75	1.95	0.44	0.64	1.28	0.21	0	0	0	0.21	0	0	0	0	1.32	0.2	0.21
gene-KI387_013923	C3H	45.22	101.59	83.75	75.73	48.61	96.13	25.08	28.91	33.98	34	40.59	36.25	16.14	26.47	48.75	41.78	90.94	99.04	100.69	65.97	64.43	54.03	68.3	81.23	76.01	57.73	75.88	62.92	96.89	92.72	93.24	127.57	117.01	126.42	94.18	83.43	75.21	88.82	72.4	65.3	61.64	72.6	69.28	83.46	90.06	84.05
gene-KI387_013946	C2C2-Dof	4.43	4.37	4.14	4.64	2.69	2.26	3.84	4.08	4.49	3.1	3.42	4.99	4.14	4.98	5.54	5.34	5.27	7.48	6.28	4.93	5.92	4.79	6.85	6.54	6.85	11.56	10.85	12.09	16.17	17.3	15.93	8.32	9.54	8.21	11.82	12.15	16.04	29.81	35.83	41.1	9.13	11.72	10.67	12.79	12.1	13.88
gene-KI387_014015	MYB-related	0	0	0	0	0	0	0	0	0	0	0	0	0	0	0	0	0	0	0	0	0	0	0.45	0	0	0	0	0	0.88	0	0	0	0	0	0	0	0	0	0	0	0	0	0	0	0	0
gene-KI387_014137	bHLH	0	0	0	0	0	0	0	0	0	0	0	0	0	0	0	0	0	0	0	0	0	0	0	0	0	0	0	0	30.31	28.15	34.41	0	0	0	0	0	0	3.11	1.43	3.09	0	0	0	0	0	0
gene-KI387_014140	bHLH	0	0	0	0	0	0	0	0	0	0	0	0	0	0	0	0	0	0	0	0	0	0	0	0	0	0	0	0	4.71	3.8	1.9	0	0	0	0	0	0	1.77	2.17	2.17	0	0	0	0	0	0
gene-KI387_014148	bHLH	0	0	0	0	0	0	0	0	0	0	0	0	0	0	0	0	0	0	0	0	0	0	0	0	0	0	0	0	1.54	1.15	2.15	0	0	0	0	0	0	0	0.15	0.49	0	0	0	0	0	0
gene-KI387_014153	bHLH	0	0	0	0	0	0	0	0	0	0	0	0	0	0	0	0	0	0	0	0	0	0	0	0	0	0	0	0	0	0	0	0	0	0	0	0	0	0	0	0	0	0	0	0	0	0
gene-KI387_014164	bHLH	5.15	12.24	11.61	6.92	7	3.05	3.18	5.04	4.85	6.22	10.5	16.56	1.06	9.8	13.96	19.76	15.74	19.19	19	13.03	11.79	10.42	24.8	21.34	22.04	30.49	32.5	28.13	23.75	20.58	19.14	27.14	30.14	30.66	43.87	41.73	33.19	19.97	23.52	27.3	29.7	46.95	40.3	54.26	51.03	49.04
gene-KI387_014197	NAC	0.15	4.43	0.9	1.69	0.63	0	0	0.1	0	0	0.08	0.12	0.15	0.1	0	0.53	2.15	2.97	2.55	0.56	1.1	1.49	4.34	4.12	3.12	2.44	2.03	1.39	1.05	1.31	1.04	18.52	18.39	20.51	4.43	1.98	3.25	1.76	2.6	1.99	3.16	3.14	3.12	17.9	20.01	18.41
gene-KI387_014225	C2C2-Dof	0	0	0	0	0	0	0	0	0	0	0	0	0	0	0	0	0	0	0	0	0	0	0	0	0	0	0	0	0	0	0	0	0	0	0	0	0	0	0	0	0	0	0	0	0	0
gene-KI387_014245	GRAS	0.3	4.55	0.71	0.48	0.5	0.43	0.12	0.48	0	0.94	0.17	0.98	0.05	0.58	1.06	1.08	0.75	0.94	0.7	1.51	2.36	1.33	2.09	1.18	1.69	2.18	2.03	1.25	18.94	18.87	19.34	7.41	6.4	8.05	2.58	2.72	0.76	8.1	9.33	7.32	1.71	0.75	1.52	3.69	4.32	5.65
gene-KI387_014256	bHLH	2.28	12.54	4.97	8.12	11.24	24.31	0.55	4.01	2.62	5.29	3.76	10.47	0.36	7.28	8.46	11.28	13.39	15.37	15.17	15.95	14.04	11.03	8.59	10.94	12.19	2.22	2.31	3.22	20.35	20.99	20.49	16.06	15.02	16.8	1.89	1.25	0.78	10.39	8.59	7.87	5.37	3.99	3.42	7.72	9.29	9.59
gene-KI387_014262	SBP	16.54	28.51	15.7	26.75	10.13	11.6	8.17	12.4	11.54	11.55	11.37	21.03	9.94	14.15	28.33	18.88	8.6	8.83	8.63	15.48	11.68	8.77	87.16	79.95	84.32	47.37	40.05	35.5	128.75	106.64	129.68	53.36	55.49	60.04	72.8	76.51	43.94	67.4	65.01	79.4	104.22	123.62	103.84	64.36	71.7	61.1
gene-KI387_014349	PLATZ	109.48	86.21	89.41	45.57	45.79	54.65	112.31	114.79	207.61	120.99	137.78	102.08	120.56	84.63	30.96	81.51	39.25	38.34	46.54	34.59	37.39	36.39	160.32	171.66	184.26	249.45	165.38	189.14	110.03	91.62	86.26	244.94	223.32	201.71	207.14	181.24	155.62	91.7	103.6	94.43	123.09	158.19	162.07	132	120.76	133.74
gene-KI387_014378	bHLH	0	0	0.23	0	0	0	0	0	0	0	0	0	0	0	0	0	1.02	1.74	1.91	0.24	0.26	0.07	0.15	0	0	0.53	1	0.45	11.93	12.19	13.74	0	0.49	0	0.88	2.34	0.56	17.32	14.16	11.69	0	0	0	0	0.34	0
gene-KI387_014386	bZIP	1.26	0.12	1.14	0.97	3.07	6.93	12.87	9.65	10.7	8.91	9.23	13.63	4.27	8.62	12.65	12.46	45.3	42.72	47.51	22.13	20.89	18.33	4.41	4.09	6.12	3.76	1.96	2.61	12.27	22.61	19.51	3.13	3.03	2.72	2.56	1.59	0.76	85.56	49.32	32.18	3.73	3.41	2.11	2.27	1.87	1.67
gene-KI387_014458	HB-BELL	1.05	1.22	0.74	1.27	0	0	0	0	0	0.17	0	0	0	0	0.08	0	0	0	0	0	0	0	0.36	0.21	0.46	3	4.85	6.56	1.2	0.63	2.05	1.9	1.25	0.29	7.97	7.2	3.67	0.84	1.61	0.2	0.1	0.37	0.75	0.6	0.72	0.87
gene-KI387_014459	HB-BELL	16.9	24.92	25.33	21.51	0	0	0	0.25	0	0	0	0	0	0	0.2	0.26	0	0.36	0	0.27	0	0	5.09	5.17	4.25	42.94	53.32	44.66	19.79	17.48	20.48	3.53	3.65	6.28	61.23	61.18	51.46	13.98	13.76	11.23	4.29	5.11	4.72	5.79	9.3	9.55
gene-KI387_014464	HB-BELL	3.49	5.1	11.27	8.75	0	0	0	0	0	0	0	0	0	0	0	0	0	0	0	0	0	0	4.69	3.99	3.58	26.15	23.88	33.69	7.29	6.81	7.09	1.6	2.54	3.11	29.44	30.43	47.83	6.95	9.51	7.43	17.35	15.86	16.31	5.63	4.82	4.98
gene-KI387_014470	C2H2	2.36	4.59	2.53	2	4.3	4.63	4.05	6.07	8.07	10.21	7.98	12.04	6.33	9.98	14.49	12.32	6.11	6.38	4.7	6.47	5.01	4.11	3.06	2.85	2.48	2.55	3.67	2.41	5.74	4.94	6.31	4.01	5.26	5.19	3.89	3.79	3.05	6.01	5.3	5.97	2.67	2.33	1.49	5.56	5.42	4.91
gene-KI387_014601	NAC	147.21	174.91	152.92	169.23	88.84	97.74	104.62	108.62	111.15	111.54	86.51	118.32	103.85	98.11	141.23	121.36	102.1	95.79	82.55	97.23	84.34	74.01	109.57	112.16	110.87	124.69	149.61	135.14	134.2	118.36	127.03	131.24	142.06	148.56	167.32	165.51	135.4	107.95	106.65	111.14	116.51	144.21	133.64	157.39	149.76	135.64
gene-KI387_014619	MADS-M-type	0.43	1.24	3.13	3.29	7.48	18.81	0.87	4.2	3.6	1.65	0	6.18	3.01	6.69	9.05	2.25	10.17	7.76	8.55	3.17	6.3	8.07	7.12	9.62	0.77	5.8	6.26	4.87	3.32	1.84	2.53	9.69	9.88	5.63	4.74	2.96	4.51	11.44	16.85	9.97	8.61	1.61	5.02	2.91	1.9	1.32
gene-KI387_014643	bZIP	3.08	0.14	2	2.52	10.13	40.57	22.04	34.36	18.08	25.74	11.78	16.89	37.87	28.42	13.03	15.73	2.25	3.41	2.5	4.85	2.35	2.08	1.61	1.08	1.86	1.2	1.08	1.7	0.46	0.26	0.26	0.77	0.83	0.93	2.07	1.07	1.67	1.04	0.27	0.88	0.66	1.3	0.36	0.29	0.51	0.83
gene-KI387_014730	MYB	0	0	0	0	0	0	0	0	0.23	0	0	0.31	0	0	0	0	0	0	0	0.14	0	0.12	0	0	0.26	0	0	0	0	0.21	0	0	0	0.23	0	0	0	0.28	0	0.71	0.23	0.28	0.22	0.74	0	0.22
gene-KI387_014738	bHLH	0	0	0	0	0	0	0	0	0	0	0	0	0	0	0	0	0	0.05	0	0	0	0	0.22	0.38	0.53	0	0	0	0	0	0	0	0	0.27	0	0	0	0	0	0	2.29	1.04	0.44	0.09	0	0.27
gene-KI387_014743	bHLH	2.75	2.83	2.74	2.36	11.84	11.77	8.43	27.58	27.82	47.72	45.83	47.15	12.57	11.33	4.02	47.41	2.4	0.15	0.9	0.58	0.94	1.56	66.69	68.34	63.85	9.51	15.12	13.55	14.33	11.63	12.19	102.92	97.46	94.22	20.91	17.98	20.27	16.12	16.64	23.81	72.01	77.28	81.85	90.37	97.27	93.74
gene-KI387_014789	C2H2	0	0	0	0	0	0	0	0	0	0	0	0	0	0	0	0	0	0	0	0	0	0	0	0	0	0	0	0	0	0	0	0	0	0	0	0	0	0	0	0	0	0	0	0	0	0
gene-KI387_014864	MYB-related	24.37	114.55	15.57	69.33	5.57	12.17	36.44	42.1	0	0	0	0	0	78.15	0	49.09	49.17	50.55	22.77	26.32	26.6	11.07	0	0	0	19.08	0	18.18	0	0	0	0	0	0	0	0	0	0	18.23	0	0	0	0	0	0	18.84
gene-KI387_014912	AP2/ERF-AP2	0	0	0	0	0	0	0	0	0	0	0	0	0	0	0	0	0	0.03	0	0	0	0	0	0	0	0	0	0	0	0.09	0.09	0	0	0	0	0	0	0.31	0.19	0.15	0	0	0.05	0	0	0
gene-KI387_014977	MYB-related	0	0	0	0	0.4	0	0	0	2.33	0.6	0	0.9	0	0	0.94	0	0.43	0.34	1.01	0.92	1.05	0.95	4.31	2.26	3.6	0	0	0	0	0	0	0.32	1.25	1.58	0	0	0	0	0	0	2.17	1.15	2.36	0	0.29	0
gene-KI387_015005	C2C2-Dof	49.12	60.09	52.55	37.61	26.71	16.77	6.82	9.57	5.62	4.03	4.89	10.09	6.41	16.88	33.18	7.7	61.92	69.23	55.34	66.28	56.61	43.6	114.93	119.19	117.39	54.84	54.43	43.04	107.99	96.85	100.88	142.84	131.18	145.28	57.36	45.23	51.18	103.73	89.07	69.7	251.24	226.82	220	198.25	182.97	173.58
gene-KI387_015063	GRAS	0	0	0	0.05	0.1	0.59	0	0.08	0.14	0	0.12	0.09	0.06	0.07	0.18	0	1.37	1.71	2.46	4.3	4.08	2.35	0	0.15	0	0	0	0	0	0	0	0.22	0.14	0	0	0	0	0	0	0.08	0.44	0	0.21	0.66	0.13	0.21
gene-KI387_015067	C2C2-GATA	3.38	6.17	8.77	5.07	13.88	14.7	6.83	11.98	9.21	11.59	8.62	13.22	9.38	12.26	10.61	12.56	11.88	7.48	10.19	11.62	11.31	8.14	6.2	6.71	4.5	4.86	5.05	6.94	5.91	4.23	6.3	5.93	6.19	6.91	7.69	4.32	5.95	5.77	6.74	5.55	3.54	5.63	3.84	4.65	5.28	4.89
gene-KI387_015082	MYB	0.16	0.31	0.07	0.07	1.34	0	0	0	0	0	0	0	0	0	0	0	0.32	0.06	0.15	1.17	1.33	0.94	1.05	1.57	0.37	0.27	0.19	0.1	0.65	0.88	0.19	0.44	0.32	1.17	0.21	0	0.1	1.05	0.93	1	0.11	0.13	0.1	0	0	0
gene-KI387_015108	bHLH	0	0	0	0.07	0.57	0	0.1	0	0	0	0.19	0	0	0	0	0.12	0.33	0.13	0	1	0.23	0.18	0	0	0	0	0	0	0	0.1	0	0	0	0	0	0	0	0	0	0	0	0	0	0	0	0
gene-KI387_015113	HB-other	11.83	17.64	15.38	11.22	10.48	15.44	14.77	16.73	14.73	11.97	15.29	14.62	15.97	17.24	17.3	15.86	11.36	14.69	13.55	16.34	13.25	13.05	13.99	15.08	16.72	25.35	22.63	26.72	19.87	21.71	19.63	23.01	23.69	23.41	32.5	36.62	53.3	56.15	64.2	68.74	48.03	34.72	31.97	33.65	30.35	33.19
gene-KI387_015126	MYB	0	0	0	0	0	0	0	0	0	0	0	0	0	0	0	0	0	0	0	0	0	0	0	0	0	0	0	0	0.28	1.05	0.84	0	0	0	0	0	0	12.66	9.78	11.02	0	0	0	0	0	0
gene-KI387_015139	BES1	1.64	5.69	3.41	1.3	2.57	3.01	8.92	12.14	11.41	13.07	6.88	15.11	6.82	12.37	17.63	12.7	19.35	18.84	19.23	9.23	9.42	8.62	11.82	11.51	11.44	3.46	3.3	5.36	8.74	7.84	7.58	9.7	8.92	8.86	4.65	4.49	4.65	10.77	10.93	11.17	8.83	10.54	12.07	9.02	10.42	7.26
gene-KI387_015140	HB-HD-ZIP	0	13.17	1.45	0	0	1.43	0	1.07	0	0.64	0	0.47	0	0.75	0	0.56	8.39	10.77	8.63	1.89	2.09	1.96	0.3	0.9	0.14	2.83	2.4	2.01	31.5	36.16	35.04	0	0.36	0.12	5.94	8.31	8.48	91.57	133.84	170.79	0.12	0.16	0.24	0.25	0	0.12
gene-KI387_015184	Trihelix	0.09	1	0.55	0.15	0.11	0	0	0.56	0.95	0.21	0.49	0.54	0.83	0.39	0.64	0.14	0.34	0.28	0.32	0.07	0	0	0.14	0.12	0.13	0	0.1	0.21	0	0	0	0	0	0	0	0	0	0.23	0.27	0	0	0	0	0	0	0
gene-KI387_015236	GRAS	7.64	10.81	9.87	19.05	59.19	31.64	18.57	36.06	33.73	48.64	51.45	34.95	43.49	35.18	21.26	32.05	13.97	12.06	11.77	13.09	12.09	10.79	65.09	63.89	61.08	31.62	46.86	42.78	39.62	34.59	33.88	68.13	70.82	69.14	40.53	41.39	34.3	40.38	47.5	49.45	50.39	41.19	40.59	44.94	42.3	43.05
gene-KI387_015238	Trihelix	33.02	34.33	20.61	25.55	34.44	36.56	62.2	59.27	73.87	57.72	99.37	75.22	42.91	53.82	68.71	74.97	50.07	50.28	42.49	65.47	63.83	65.67	427.08	416.04	426.42	258.24	212.1	114.66	600.71	461.9	609.6	159.85	133.12	149.13	258.51	455.22	197.97	158.21	109.18	104.08	760.67	617.35	577.87	278.71	319.01	315.69
gene-KI387_015337	AP2/ERF-ERF	0	0	0	0	0	0	0	0	0	0	0	0	0	0	0	0	0	0	0	0	0	0	0	0	0	0	0	0	0	0.39	0.39	0	0	0	0	0	0	0	0	0	0	0	0	0	0	0
gene-KI387_015396	C3H	19.68	33.92	24.21	18.81	18.25	13.66	3.51	11.58	3.81	17.26	5.4	17.14	8.64	10.13	9.97	14.42	14.05	15.38	15.47	12.82	11.3	9.62	27.49	25.46	30.34	28.79	28.08	32.63	20.25	19.71	18.91	36.5	37.9	41.4	40.68	38.1	38.98	21.47	24.14	24.49	27.07	33.39	30.62	38.93	44.87	37.21
gene-KI387_015450	bHLH	15.55	13.96	12.74	17.87	11.69	9.53	1.02	9.51	4.81	10.85	7.62	10.63	4.2	12.17	11.75	11.18	9.68	10.75	10.04	5.53	7.68	6.41	21.63	19.82	17.17	10.08	10.94	10.59	5.09	7.3	6.87	96.57	86.76	92.11	13.29	11.54	11.2	9.63	7.75	9.13	38.57	31.69	39.3	76.49	71.97	74.93
gene-KI387_015461	bHLH	4.64	11.11	6.53	10.92	15.26	31.53	23.11	9.88	25.12	21.97	66.67	38.34	14.38	21.83	59.34	36.5	35.95	40.79	39.19	69.49	64.89	62.65	21.63	24.19	20.18	21.42	14.74	17.6	37.85	45.34	31.66	19.9	16.11	19.31	16.65	10.63	19.91	103.37	82.86	74.81	22.11	26.6	22.4	24.72	25.82	22.3
gene-KI387_015467	C2C2-Dof	0	0	0	0	0	0	0	0	0.44	0	0	0.39	0	0	0	0.17	0	0	0	0	0	0	0	0	0	0	0	0	0	0	0	0	0	0	0	0	0	0	0	0	0	0	0	0	0	0
gene-KI387_015470	MYB-related	0	0	0	0	0	0	0	0	0	0	0	0	0	0	0	0	0	0	0	0	0	0	0	0	0	0	0	0	0	0	0	0	0	0	0	0	0	0	0	0	0	0	0	0	0	0
gene-KI387_015562	C3H	0	0	0	0	0	0.1	0	0	0	0.18	0	0	0	0	0	0	0.43	0.23	0	0.25	0.3	0	0	0	0	0	0	0	0	0	0.18	0.21	0	0	0	0	0	1.23	0.2	0	0	0	0	0	0	0
gene-KI387_015610	MYB-related	10.58	14.13	13.61	13.93	11.03	6.71	8.38	11.57	8.14	9.04	8.84	12.49	11.48	12.96	16.28	12.4	9.31	8.97	8.01	9.44	8.33	7.56	14.6	16.21	17.12	19.25	21.33	21.19	20.81	17.05	20.06	15.31	14.88	17.27	25.94	18.88	21.67	25.03	19.91	19.56	20.29	19.18	21.24	14.01	16.08	12.62
gene-KI387_015619	C2H2	0.59	0.11	0.58	0.4	0	0	0	0	0	0	0	0	0	0	0	0	0	0	0	0	0	0	41.75	39.56	34.76	0.54	0.14	0.57	6.55	10.05	6.74	23.53	25.74	25.69	0.79	0.49	1.13	5.02	6.71	5.41	47.61	49.19	52.23	31.05	40.06	34.75
gene-KI387_015672	C2H2	4.12	5.18	4.69	5.38	10.42	19.39	9.73	10.89	9.14	10.82	6.96	12.43	13.98	12.98	12.64	14.01	14.68	15.08	15.22	16.11	14.74	10.57	9.13	8.52	7.79	7.21	8.61	7.42	11.5	11.92	13.12	13.29	14.27	14.23	10.59	9.99	10.77	11.38	10.81	10.62	10.18	9.45	8.47	14.31	12.71	9.91
gene-KI387_015673	bZIP	42.5	57.53	42.4	49.65	28.05	40.6	33.33	46.04	29.31	38.52	33.3	43.3	29.48	33.93	41.58	33.88	30.05	29.1	24.92	25.8	22.44	16.22	61	53.42	65.47	40.33	34.8	45.77	38.35	38.24	38.68	108.42	111.8	117.89	53.77	52.37	48.3	69.7	63.22	60.56	56.73	83.76	67.01	100.7	98.95	94.89
gene-KI387_015699	MYB-related	0	0	0	0	0	0	0	0	0	0	0	0	0	0	0	0	0	0	0	0	0	0	0	0	0	0	0	0	0	0	0	0	0	0	0	0	0	0	0	0	0	0	0	0	0	0
gene-KI387_015700	MYB-related	7.88	12.49	9.34	7.69	3.61	0	0	0	0	0	0	0	0	0	0	0	14.65	6.04	6.11	6.41	14	8.78	0	0	0	0	0	2.94	0	5.95	3.32	0	0	0	0	4.05	0	7.61	3.08	0	0	0	2.87	7.95	0	0
gene-KI387_015701	MYB	6.58	15.73	2.87	19.02	2.65	0.07	0.67	2.17	1.23	2.97	0.74	7.86	1.13	0.58	10.06	5.49	5.2	6.02	6.04	3.94	7.81	4.45	4.35	1.92	3.29	3.12	4.64	8.32	13.49	15.72	12.73	4.05	3.22	3.25	18.45	12.35	5.83	12.31	11.77	8.23	0.56	0.89	1.08	0.29	0.65	0.14
gene-KI387_015702	MYB	10.67	24.8	14.36	24.25	13.56	0.14	1.13	4.08	2.71	7.8	1.52	16.52	2.33	2.58	17.87	15.66	16.56	17.04	18.57	14.02	24.77	13.99	10.52	6.3	8.24	1.82	2.25	1.69	8.18	11.82	7.29	3.28	5.28	4.27	11.81	6.53	1.92	8.69	8.03	7.79	0.93	2.69	2.43	0.55	0.49	0
gene-KI387_015703	MYB-related	0.32	0	0.52	0.27	0.37	0	0	0	0	0	0	1.5	0	0	0	0	1.21	0.48	0.58	0	0.85	0.45	0	0	0	0	0	1.27	0	0	0	0	0	0.48	0.47	1.01	1.31	3.98	7.21	1.96	0	0	0	0	0	0
gene-KI387_015722	AP2/ERF-ERF	0	0	0	0	0.06	0	0	0	0	0.1	0	0.15	0	0	0.11	0	2.24	0.7	1.01	1.62	1.62	0.99	0.59	0.38	0.28	0	0	0	18.3	16.27	15.01	1.36	1.19	1.8	0.24	0	0.11	12.43	14.48	16.79	0.12	0	0	0.25	0.66	0.24
gene-KI387_015808	C2H2	29.59	15.11	20.16	21.34	6.4	2.66	22.23	16.36	36.02	30.22	3.77	33.14	11.9	44.12	34.57	24.34	17.58	33.52	31.89	20.43	13.28	13.46	52.45	29.21	18.13	8.26	32.79	35.65	37.63	33.93	39.57	24.04	40.89	47.93	44.24	28.24	45.23	27.45	24.3	38.02	2.21	27.77	26.9	27.72	48.23	18.22
gene-KI387_015824	bHLH	0	0	0	0	0	0	0	0	0	0	0	0	0	0	0	0	0	0	0	0	0	0	0	1.12	1.24	0	0	0.32	0	0	0	3.68	3.27	4.02	0	0	0	0	0	0	1.78	0	0.34	1.13	1.66	0.71
gene-KI387_015862	HSF	56.07	20.7	31.93	33.47	77.68	97	94.86	128.61	122.15	88.98	131.33	91.62	75.82	82.53	83.31	82.8	38.92	46.84	34.99	63.22	56.47	52.15	105.08	97.21	112.86	103.6	83.25	91.94	44.25	43.34	33.26	149.92	155.28	149.9	57.52	50.38	49.37	81.55	90.87	63.36	83.57	100.8	84.11	178.46	166.72	161.72
gene-KI387_015900	NAC	22.4	15.32	35.29	5.81	1.98	3.08	27.16	60.34	34.76	101.45	87.57	151.52	8.36	25.07	31.88	142.42	8.18	6.02	7.04	13.68	11.92	13.37	3.84	2.87	3.79	72.32	125.25	81.16	44.01	32.2	36.5	0.8	0.9	1.3	105.32	139.82	107.32	13.75	19.94	18.97	15.1	15.08	13.47	11.48	11.31	12.97
gene-KI387_015938	GARP-G2-like	9.01	13.9	7.82	6.9	0	0	0.32	0.37	0.66	0.2	0.9	1.03	0.09	0.12	1.41	1.82	0.69	0.47	1.77	0	0	0	17.42	20.23	20.55	15.3	21.89	18.92	42.1	37.48	42.39	30.71	34.17	39.5	24.23	19.4	21.26	41.37	43.73	42.24	25.5	25.9	25.22	45.94	49.34	42.1
gene-KI387_015961	bHLH	0.2	0.59	1.23	0.88	0.04	0	0	0.09	0	0	0	0	0	0	0	0	1.47	1.83	0.56	0	0	0	0	0	0.1	1.29	1.1	0.81	0	0.08	0	0	0	0	1.34	1.11	1.67	2.41	3.97	2.4	0.09	0	0	0	0	0.18
gene-KI387_015978	bHLH	0	0	0	0	0	0	0	0	0	0	0	0	0	0	0	0	0	0	0	0	0	0	0	0	0.21	0	0	0	0	0.16	0	0	0	0.36	0	0	0	0.22	0.34	0.37	0	0	0	0	0	0
gene-KI387_016007	CPP	4.74	6.81	5.27	4.38	1.96	1.53	4.05	5.19	5.06	6.44	4.85	7.46	3.12	6.17	7.01	7.33	7.38	7.72	6.44	6.17	6.38	4.61	7.14	7.23	6.57	3.98	4.99	4.07	5.73	5.14	4.69	14.67	10.92	11.33	7.49	7.62	6.22	7.28	5.19	6.56	4.49	6.28	6.05	11.81	11.78	12.25
gene-KI387_016017	HB-HD-ZIP	3.11	3.06	3.58	1.38	0	0	0.08	0	0.04	0	0	0.06	0	0.04	0.04	0.1	0.04	0	0	0	0	0	0	0	0	16	17.5	19.38	251.55	234.48	219.69	0	0	0	19.22	22.51	19.98	56.1	57.95	50.68	0	0	0	0	0	0
gene-KI387_016018	HB-HD-ZIP	0	0	0	0	0	0	0	0	0	0	0	0	0	0	0	0	0	0	0	0	0	0	0	0	0	0	0	0	0	0	0	0	0	0	0	0	0	0	0	0	0	0	0	0	0	0
gene-KI387_016040	PLATZ	26.08	57.91	34.1	42.3	14.47	22.12	7.27	7.66	14.46	16.33	22.1	35.19	4.17	15.22	43.97	38.97	117.72	126.02	118.66	80.25	74.1	48.74	173.77	169.22	172.88	41.96	34.57	40.72	49.06	47.25	36.65	427.26	396.61	409.63	35.01	33.39	28.84	76.4	67.66	72.73	178.49	220.9	235.29	427.64	421.67	454.97
gene-KI387_016210	MADS-MIKC	0	0	0.17	0	0	0	0	0	0	0	0	0	0	0	0	0	0	0	0	0	0	0	0	0	0	0	0	0	13.89	11.1	13	0	0	0	0	0	0	3.81	6.3	9.76	0	0	0	0	0	0
gene-KI387_016275	Trihelix	40.01	114.96	49.98	48.36	19.71	13.8	7.07	12.41	10.3	6.7	17.4	14.88	7.08	13.67	23.82	14.77	61.2	70.91	68.78	74.2	76.77	68.55	64.96	59.83	70.01	145.71	177.71	150.84	217.84	224.84	217.18	81.69	89.9	75.85	214.62	172.93	174.9	289.24	240.53	253.16	57.23	54.51	54.65	98.98	85.32	94.32
gene-KI387_016347	bZIP	11.46	15.96	8.7	11.35	26.59	47.72	10.88	19.5	15.44	15.98	18.33	24.87	15.17	19.33	13.15	26.8	17.6	20.08	18.1	20.99	22.98	14.49	5.84	7.48	5.8	11.57	12.91	12.68	14.48	9.71	7.86	6.91	4.06	7.55	15.21	8.53	13.24	10.23	10.27	9.46	8.3	12.87	11.03	7.2	5.24	11.58
gene-KI387_016360	C3H	19.21	8.46	5.93	11.97	7.73	12.76	27.79	15.89	21.13	13.78	13	10.69	14.97	15.04	13.79	9.82	11.23	11.68	13.37	14.12	12.04	10.37	38.02	32.05	35.27	18.72	17.4	22.52	16.26	17.91	16.2	32.88	31.81	41	20.19	19.32	14.71	24.11	23.21	24.31	33.03	55.24	50.6	46.22	40.34	46.89
gene-KI387_016473	LOB	0.2	0.19	0.16	0	0.36	0	0.28	0	0.29	0.53	1.31	0.39	0	0	1.37	0	2.52	1.67	1.28	14.69	9.32	3.28	39.7	35.28	39.91	1.19	2	0	17.03	6.84	9.69	2.56	3.63	2.53	1.4	0.59	0.51	2.04	1.61	2.32	3.87	4.14	3.96	7.51	3.84	4.65
gene-KI387_016486	HB-other	11.93	8.45	8.41	9.3	10.25	12.62	16.72	17.9	11.95	14.06	9.19	16.12	20.83	21.17	18.64	15.19	10.79	12.58	10.61	10.65	8.08	7.68	15.72	15.33	18.07	19.84	18.48	19.64	16.34	14.98	16.58	22.6	21.98	25.5	21.96	23.47	17.58	20.69	20	22.73	20.68	21.35	17.75	24.9	28.26	22.4
gene-KI387_016530	bHLH	0.75	3.3	1.42	1.32	0.46	0.27	0.04	0.25	0.04	0.36	0	0.36	0.04	0.19	0.16	0.31	0.48	0.75	0.48	1.21	1	0.88	1.06	1.07	1.24	0.78	1.2	1.41	3.08	3.8	3.16	1.34	1.85	1.73	1.61	1.1	0.9	1.13	0.71	1.06	0.97	0.62	1.03	1.73	0.93	1.48
gene-KI387_016545	bHLH	6.42	10.7	9.86	5.06	1.32	5.8	0	1.46	1.11	2.34	1.69	3.83	0	2.92	4.23	3.59	75.92	69.37	74.48	29.61	22.88	22.7	41.93	44.09	42.26	3.16	4.41	5.05	7.19	7.32	5.42	54.27	55.32	59.86	11.3	14.09	7.42	15.5	14.23	10.47	15.07	23.23	20.46	19.79	20.63	21.8
gene-KI387_016575	TUB	0	0.69	0	0	0	0	0	0	0	0	0	0	0	0	0	0	0	0	0	0.27	0	0	0	0.05	0	0	0	0	0	0	0	0	0	0	0	1.46	0	0	0	1.4	0	7.28	0	0	0	0
gene-KI387_016638	NAC	0	0	0.07	0.23	0.5	0	0.56	0.13	0.35	0.21	1.47	1.08	0	0.24	0.85	0	0.27	0.42	0.08	1.93	0.62	0.86	3.7	4.55	1.54	0.1	0.32	0	1.03	0.77	1.42	0.49	1.19	0.24	0	0.13	0.11	0	0	0	0.12	0.61	0.92	0	0	0
gene-KI387_016789	NF-YB	19.71	22.22	12.79	14.15	18.6	58.82	40.48	52.16	52.58	57.16	44.37	57.62	32.94	45.04	55.02	62.55	44.43	41.99	40.03	22.98	31.89	25.25	25.95	18.86	20.11	10.3	21.12	13.51	46.34	34.42	38.4	29.37	25.36	19.95	16.25	3.11	10.39	29.34	21.22	29.6	16.44	16.26	25.45	24.92	21.94	26.13
gene-KI387_016790	NAC	0.28	0	0	0	0.23	2.99	0.12	0.53	0.47	0.96	1.61	1.1	0.29	1.62	0.98	0.56	0	0	0	0.08	0.06	0.2	3.33	3.36	3.15	0.52	0.66	0	5.28	4.5	5.94	0.5	0.37	0.62	0.5	0	0.22	7.11	4.54	3.85	5.17	8.54	6.85	0.63	2.25	0.49
gene-KI387_016852	C3H	58.06	64.68	56.15	45.78	31.98	42.37	63.91	64.22	66.22	63.73	68.6	78.33	71.03	71.54	88.89	75.7	86.03	86.43	79.02	66.32	61.56	62.42	47.7	45.5	43.69	47.83	64.25	53.33	61.05	68.73	70.43	80.87	83.5	79.22	65.69	56.81	64.95	77.51	74.15	72.3	51.86	56.28	55.18	68.75	73.81	74.39
gene-KI387_016911	AP2/ERF-AP2	0	0	0	0.07	0	0	0.29	0	0	0	0.09	0	0.49	0	0	0.47	0	0	0.07	0.34	0.43	0.17	0.13	0.11	0.37	0.18	0	0.09	0	0	0	0.21	0.21	0.21	0.11	0.33	0.19	1.28	1.01	0.98	0	0.26	0	0	0.1	0
gene-KI387_016943	C3H	21.97	29.09	29.72	23.01	23.88	36.43	26.22	30.28	36.44	35.28	38.38	44.11	21.83	37.97	50.76	46.94	22.09	23.14	22.63	25.8	24.04	19.68	15.65	12.6	13.48	24.89	24.88	26.02	19.89	20.52	17.05	14.28	16.23	14.21	23.91	25.72	25.51	21.38	19.5	19.95	23.16	20.03	19.31	26.04	25.82	27.52
gene-KI387_017055	Whirly	4.13	2.65	4.12	2.55	1.78	2.82	6.12	9.17	11.19	11.71	4.05	11.76	4.91	8.11	6.93	12.16	7.31	10.46	7.95	5.93	4.03	4.41	1.63	0.67	1.12	1.11	3.21	5.28	5.96	5.02	4.77	3.65	2.94	4.6	1.63	2.4	2.97	6.33	5.95	5.76	1.29	0.4	0.92	4.74	1.79	3.51
gene-KI387_017132	C2H2	0.21	0.1	0.09	0.14	0.13	0.08	0.25	0.51	0.26	0.7	0.3	0.17	0.27	0.34	0.47	0.68	0.47	0.9	0.69	0.45	0.44	0.51	0.17	0.15	0.49	0.06	0.12	0	0.26	0.38	0.13	0.07	0.41	0.14	0	0.07	0.25	0.17	0.27	0.14	0	0.09	0.07	0.21	0.19	0.14
gene-KI387_017175	WRKY	3.92	2.61	1.92	1.2	4.73	0.26	0.69	3.61	1.66	9.74	1.18	12.34	1.37	2.99	7.5	14.53	13.82	18.9	18.1	6.15	5.54	3.38	14.12	13.22	13.94	10.08	15.67	10.41	50.37	45.76	46.52	33.64	30.63	33.56	23.71	27.72	12.72	65.97	59.02	57.05	17.9	14.94	14.8	60.99	65.26	65.41
gene-KI387_017232	CPP	1.17	0.11	0.16	0.2	2.14	7.25	1.09	2.1	3.12	4.41	1.83	7.99	0.27	3.62	7.74	6.06	11.88	11.43	12.68	8.34	5.92	4.25	5.1	5.37	3.88	0.86	0.8	0.59	8.15	5.85	6.99	14.67	14.3	15.93	1.01	0.94	0.9	4.47	5.19	5.19	2.38	2.82	2.62	19.66	27.71	22.3
gene-KI387_017278	C2C2-YABBY	0	0.29	1.49	1.82	0	0	0	0	0	0	0	0	0	0	0	0	0	0	0	0	0	0	0	0	0	0.38	2.85	1.21	6.04	4.89	4.56	0	0	0.46	0.45	3.84	2.08	0	0.43	0.47	0	1.09	0.42	0	0	0
gene-KI387_017370	WRKY	79.09	8.43	5.37	6.65	262.83	3632.71	178.98	104.12	169.42	103.04	175.2	112.34	98.28	91.57	64.83	116.24	126.05	153.36	138.5	114.92	128.05	105.8	243.11	245.13	274.48	34.05	25.15	18.31	23.44	17.69	16.79	149.95	151.63	138.16	28.11	32.15	32.6	30.51	18.76	19.69	354.77	448.69	411.91	152.39	185.84	178.52
gene-KI387_017455	HB-HD-ZIP	30.81	178.33	72.33	55.7	5.24	12.53	9.67	8.42	9.27	11.5	16.17	21.45	6.94	12.71	29.6	26.6	12.6	11.4	12.17	14.76	13.97	14.01	8.31	7.04	8.4	142.09	205.46	195.05	88.13	100.14	94.13	11.53	11.35	9.27	277.84	278.18	404.4	100.19	97.36	102.07	11.08	11.39	13.66	20.58	14.32	18.73
gene-KI387_017529	bHLH	13.8	17.17	9.68	15.98	63.68	904.84	13.24	14.78	23.86	13.51	22.21	21.74	18.44	21.16	34.1	21	15.07	20.86	16.9	13.91	13.15	10.53	39.65	40.41	42.44	20.54	21.08	21.55	32.52	31.06	28.29	28.08	33.09	34.12	24.86	25.42	21.6	42.23	43.2	38.34	34.48	32.1	33.01	35.05	32.28	35.3
gene-KI387_017640	E2F-DP	0.77	1.18	0.48	0.33	0.87	0.05	1.77	2.67	4.89	5.05	2.66	7.88	0.39	2.41	10.65	11.03	10.19	9.68	10.36	11.89	10.78	6.97	2.46	2.38	1.17	1.64	1.04	0.84	7.81	8.74	7.62	2.67	2.4	3.51	1.77	1.39	0.67	7.95	6.19	5.67	1.35	1.17	2.18	3.34	4.14	2.65
gene-KI387_017765	B3-ARF	0.94	3.73	1.1	2.8	1.83	0.43	0.71	0.43	0.6	0.97	0.63	1.26	0.6	0.68	1.29	1.21	2.21	2.34	2.57	1.81	1.79	0.98	2.44	2.21	2.45	5.07	7.32	6.81	29.17	27.92	33.7	6.2	5.85	6.16	10.45	8.17	8.52	36.02	37.52	41	2.1	2.01	2.69	2.42	2.97	2.35
gene-KI387_017865	GRAS	0	0	0	0	0	0	0	0	0	0	0	0	0	0	0	0	0	0	0	0	0	0	0.28	0	0	0	0	0	0	0	0	0	0.11	0	0.23	0	0	0.14	0.11	0.12	0.23	0	0	0	0	0
gene-KI387_017904	MYB-related	0	0	0	0	0	0	0	0	0	0	0	0	0	0	0	0	0	0	0	0	0	0	0	0	0	0	0	0	0	0	0	0	0	0	0	0	0	0	0	0	0	0	0	5.95	0	0
gene-KI387_018026	C2H2	0	0	0	0	0.05	0.53	0	0	0	0	0	0	0	0.1	0	0	1.95	4.62	2.1	0.06	0.05	0.06	0.25	0.95	0.58	0.17	0.09	0.36	0.86	2.65	2.18	0	0.1	0.1	1.71	1.45	0.27	3.2	1.26	0.73	1.4	0.51	0.19	0.1	0	0.2
gene-KI387_018119	MYB-related	0	3.91	0	3.44	0.75	0	0	0	0	6.77	0	0	0	0	0	0	1.28	3.16	2.56	0	0	0	10.86	6.59	7.67	0	0	0	4.35	0	0	14.41	0	4.11	3.47	0	0	8.11	6.58	3.82	0	0	0	0	0	13.61
gene-KI387_018179	LIM	0	0	0	0	0.13	4.26	0	2.68	0.67	1.22	0.3	1.81	0	0.35	0.63	1.61	13.98	15.74	11.17	16.34	9.17	4.92	5.92	4.23	6.16	0	0	0	1.92	4	2.59	1.28	1.89	1.91	0.94	0.99	0.57	1.15	0	0.98	0.62	0.39	0.3	0	0	0
gene-KI387_018283	bHLH	2.78	11.43	8.25	4.31	12.05	5.89	11.04	12.02	21.28	20.32	35.7	38.91	8.3	20.64	46.21	38.79	57.49	57.43	60.69	42.42	35.21	25.07	25.08	22.09	17.89	1.57	2.53	3.35	5.76	6.37	6.1	10.35	10.15	9.26	3.29	1.04	4.73	3.5	2.9	4.45	20.49	20.41	24.54	4.53	5.08	3.51
gene-KI387_018284	bHLH	0	0	0	0	2.62	0	1.14	2.22	0.98	1.24	1.59	1.57	2.26	1.65	1.45	1.16	4.79	4.75	6.88	1.94	1.47	0.52	6.07	7.16	3.86	0	0.17	0	0	0	0.36	0.4	0.58	0	0	0	0	0	0	0.41	2.93	3.18	4.3	0	0	0.39
gene-KI387_018290	bHLH	92.13	56.46	123.56	25.56	74.58	13.38	59.85	35.7	69.78	46.03	53.87	63.48	70.79	43.02	78.67	61	202.83	229.61	222.77	153.86	159.17	168.26	106.37	119.9	124.66	97.31	108.74	131.71	24.26	29.97	28.48	10.72	8.62	7.74	44.82	51.88	87.17	25.48	20.28	26.49	111.91	77	88.1	26.49	20.94	23.97
gene-KI387_018291	bHLH	0	0	0	0	0.18	3.53	0	0.23	0	0	0.55	0.27	0.17	0	0.38	0	0	0	0.14	0	0	0	0.51	0	0	0	0	0	2.75	3.16	2.98	0	0	0	0	0	0.18	0.5	0.79	1.06	0	0	0.19	0	0	0
gene-KI387_018324	bHLH	48.42	56.01	37.9	58.29	33.54	7.21	57.01	8.43	104.07	6.53	73.28	15.71	19.42	7.22	17.7	15.09	51.04	48.1	46.2	33.9	35.86	30.12	62.34	63.54	61.63	36.63	59.35	56.36	147.25	140.69	139.13	49.02	41.12	47.16	109.2	97.83	94.31	184.22	217.67	249.05	54.66	68.93	63.7	70.98	67.96	61.95
gene-KI387_018325	bHLH	0.88	1.47	0.5	2.81	12.93	17.06	18.5	11.29	14.12	11.76	19.47	14.73	10.37	14.31	14.83	13.08	14.72	12.14	13.82	12.56	10.31	6.67	82.48	75.19	74.95	3.85	6.48	3.04	15.36	17.83	18.06	83.61	84.19	80.1	18.17	8.81	9.69	9.66	8.9	5.16	63.65	71.66	72.58	95.65	93.14	96.32
gene-KI387_018569	B3	0.24	0.94	0.57	0.21	0.2	0.07	0.61	0.75	0.83	0.93	0.53	1.21	0.72	0.93	1.44	1.26	0.55	0.65	0.84	0.59	0.31	0.26	0.49	0.38	0.94	1.3	1.15	1.92	2.47	2.01	1.91	0.09	0.35	0.63	1.81	2.13	2.27	4.93	3.58	3.18	0.77	0.46	0.56	0.23	0.49	0.67
gene-KI387_018620	C2H2	0.53	2.73	2.11	1.82	26.87	26.91	4.79	12.48	4.92	13.81	10.25	23.1	10.47	17.86	18.93	25.79	28.04	34.41	34.08	9.73	7.61	6.55	24.1	24.28	22.16	3.38	4.14	3.92	0.43	0.75	0.32	47.72	46.25	51.78	4.93	4.61	5.33	4.02	6.91	3.4	31.19	30.04	29.23	50.11	48.68	48.73
gene-KI387_018645	Trihelix	10.97	13.35	12.41	12.03	27.49	18.2	13.46	12.65	16.69	12.51	19.73	15.5	10.63	19.69	30.1	17.67	34.33	42.13	33.69	25.13	24.3	19.81	96.8	99.76	100.25	55.81	37.46	43.52	43.13	34.2	34.81	43.89	44.66	47.81	61.93	62.74	48.96	41.8	40.53	40.35	126.85	129.71	118.69	63.75	73.66	71.78
gene-KI387_018715	MYB	0.55	2.12	1.27	0.38	0	0	0	0	0	0	0	0	0	0	0	0	0	0	0	0	0	0	4.53	2.62	3.42	10.14	9.28	8.66	10.63	10.06	12.99	3.16	1.46	1.47	9.16	6.13	4.36	2.89	2.85	3.37	0.59	0.55	1.69	0.75	1.35	0.43
gene-KI387_018718	Trihelix	14.97	10.55	8.24	6.57	5.69	5.99	9.02	8.18	7.2	6.49	5.53	6.57	6.43	7.41	8.22	7.12	10.32	12.11	11.82	5.65	4.99	5.7	35.64	37.22	37.79	19.03	16.99	20.36	17.72	19.13	16.35	40.69	35.96	42.55	18.95	19.34	19.87	30.3	23.77	23.19	27.34	57.34	50.95	41.77	48.91	48.3
gene-KI387_018723	MYB	0	0	0	0	0	0	0	0	0	0	0	0.31	0	0	0	0	0	0	0	0	0	0	0	0	0	0	0	0	0	0.21	0	0	0	0	0	0	0	0	0	0	0	0	0	0	0	0
gene-KI387_018839	HB-BELL	53.29	108.58	81.69	105.64	31.42	28.93	17.66	19.11	21.02	13.17	28.34	29.03	17.12	28.98	60.56	25.2	68.69	82.56	71.74	22.09	20.41	21.07	62.65	62.7	62.3	193.87	189.19	212.9	141.12	134.18	148.59	97.8	93.4	109.43	231.32	227.13	201.41	134.14	154.18	183.5	40.58	41.66	39.02	80.62	85.69	73.32
gene-KI387_018916	MYB	0	0	0	0	0	0	0	0	0	0	0	0	0	0	0	0	0	0	0	0	0	0	0	0	0	0	0	0	0	0	0	0	0	0	0	0	0	5.33	0.7	1.91	0	0	0	0	0	0
gene-KI387_018956	GARP-ARR-B	8.23	36.2	10.68	7.88	0.12	0	0	0	0	0	0	0	0	0	0.11	0	0.66	0.51	0.62	0	0	0	0.47	1.73	2.95	7.54	7.76	7.12	22.5	22.2	22.25	4.54	5.01	4.68	11.2	7.9	9.19	19.75	13.51	14.1	1.01	1.6	2.06	5.84	7.76	6.87
gene-KI387_018974	bZIP	23.33	32.95	19.94	40.44	11.49	6.29	1.74	4.31	4.85	3.84	4.88	6.8	1.61	3.76	6.13	8.29	27.19	27.16	26.07	12.56	13.43	14.94	72.75	72.46	69.77	91	74.84	89.35	43.41	51.87	56.68	56.33	55.07	66.05	66.73	52.12	54.86	64.18	68.41	69.01	48.76	47.1	41.84	59.14	66.44	60.78
gene-KI387_018999	MYB	21.44	32.02	6.54	46.64	11.19	0	0.7	1.16	3.7	1.95	1.96	6.58	0.59	0.65	6.58	7.02	7.9	7.93	8.68	2.5	2.02	1.43	10.33	8.28	7.42	0.09	2.68	4.4	15.21	13.9	13.55	3.1	2.66	2.37	16.94	14.23	2.41	2.52	2.62	1.8	1.51	0.95	2.38	0.99	0.99	1.17
gene-KI387_019000	MYB-related	0.46	0	0.06	0.07	2.24	3.42	0.55	0.32	1.33	1.62	0.26	3.92	0.16	1.79	4.33	1.89	3.97	4.03	4.83	2.39	1.14	0.89	0.37	0.74	0.47	0	0.18	0.18	0.98	1.55	1.63	0.41	0.69	0.8	0.3	0.31	0.36	1.35	0.58	0.94	0.3	0.63	0.48	0.31	0.18	0.1
gene-KI387_019044	GRAS	0	0.04	0	0	0.2	0.12	0.19	0.11	0.39	0.26	0.18	0.46	0	0.05	0.31	0.63	0.32	0.28	0.38	0.07	0.11	0.18	0.45	0.33	0.49	0.27	0.19	0	0.58	0.58	0.38	0.43	0.21	0.11	0.16	0	0	1.17	0.57	0.77	0.05	0.13	0.15	0.11	0.1	0.05
gene-KI387_019100	HB-HD-ZIP	0	0	0	0	0	0	0	0	0	0	0	0	0	0	0	0	0	0	0	0	0	0	0	0	0	0	0	0	0	0	0	0	0	0	0	0	0	0	0	0	0	0	0	0	0	0
gene-KI387_019132	C2H2	3.27	4.3	3.52	2.36	3	5.1	2.82	2.47	1.69	0.87	2.82	5.5	3.38	5.6	5.62	3.16	6.35	4.85	8.34	3.17	1.87	1.85	5.59	6.4	7.12	3.62	5.07	5.56	6.36	6.67	8.21	4.84	10.38	9.99	4.98	4.71	8.35	9.54	9.13	6.9	4	5.29	5.4	6.35	9.76	8.84
gene-KI387_019170	MYB	0	0	0	0	0	0	0	0	0	0.27	0	0.4	0	1.26	0	1.07	0	0.16	0.19	0	0	0	1.07	0.59	1.64	0	0	0	0	1.04	0	0.29	0.57	0.57	0	0	0	0	0	0	0	0.35	0.27	0	0	0
gene-KI387_019172	Trihelix	11.45	20.99	19.63	7.56	13.32	20.14	7.77	11.66	13.28	13.4	9.76	13.57	6.17	14.3	12.23	17.36	32.62	36.02	30.5	14.06	10.71	14.8	32.5	35.09	30.04	27.7	30.66	27.75	30.68	30.71	42.32	54.73	58.07	56.41	32.38	40.42	33.42	47.16	40.8	47.18	55.6	46.46	39.22	63.46	72.61	62.28
gene-KI387_019175	MYB	0	0	0	0.19	0	0	0	0	0	0	0	0.45	0	0	0	0	0	0	0.2	0	0	0	0.4	0.33	0.73	0	0	0.29	0.39	0	0	0.32	0	0.32	0	0	0	0.39	0.3	0.66	0	0.39	0.3	0	0	0
gene-KI387_019176	NAC	7.85	13.1	10.92	8.3	9.05	8.55	2.48	6.29	4.67	5.82	5.5	8.09	3.67	8.23	10.09	7.84	24.32	25.1	25.09	13.02	11.62	12.43	25.24	26.98	25.62	24.24	18.61	23.4	25.86	21.28	25.37	41.18	37.03	46.02	26.93	28.95	21.88	33.57	29.06	30.26	25.92	34.72	30.24	31.6	39.23	37.35
gene-KI387_019178	NAC	6.5	11.87	16.17	11.04	9.1	77.47	1.91	4.77	3.59	4.48	1.93	3.58	4.62	5.91	10.55	6.03	22.36	26.92	21.28	20.21	15.72	13.45	18.32	16.48	15.23	13.46	14.7	16.4	9.75	9.56	9.2	14.18	14.06	15.78	14.45	13.71	17.13	21.71	15.95	18.27	33.02	40.29	38.83	19.45	20.23	16.57
gene-KI387_019222	bHLH	0.14	0.78	0	4.29	0	0	0	0	0	0	0	0	0	0	0	0	0.13	0	0	0	0	0	0.23	0	0	0	0.16	0	0.67	0.83	1.16	0.37	0	0	0.18	0	0	0.67	0.35	0.76	0.91	0.69	0.7	0	1	0.36
gene-KI387_019225	MYB	73.66	59.67	50.6	78.81	35.02	32.23	46.37	36.17	37.85	23.11	53.92	21.04	79.36	58.25	68.51	24.24	17.12	19.59	17.94	21.33	23.01	18.73	289.09	274.13	274.96	136.35	132.63	106.94	54.97	49.55	52.64	187.59	177.79	195.52	154.38	127.75	104.24	22.49	27.52	25.87	248.38	234.77	251.87	256.22	251.79	248.02
gene-KI387_019242	bHLH	0	0.32	0	0	0	0	0	0.16	0.44	0.26	0.26	0.97	0	0.15	0.8	1.37	18.82	17.72	16.62	2.45	1.45	1.29	1.47	1.56	2.26	0.51	0.53	0.68	2.92	2.99	4.49	1.68	1.18	1.49	2.7	2.33	1.21	20.87	17.63	26.24	1.04	0.37	0.57	1.84	2.05	1.47
gene-KI387_019378	bHLH	20.29	4.62	3.39	5.29	37.54	0	0.15	0.84	0.3	0.81	0.4	3.38	0	0.63	1.1	3.34	30.61	26.14	32.39	3.86	3.19	2.73	0	0	0.36	1.17	10.59	15.49	9.73	11.01	8.35	0.16	0.45	0.31	80.17	67.48	16.32	15.77	16.31	9.98	0	0.19	0.58	0.16	0.14	0.45
gene-KI387_019381	bHLH	27.91	12.7	16.35	7.5	17.75	0	0	0	0	0.16	0	0.46	0	0	0.16	0.62	10.36	6.22	9.49	0	0	0.19	0	0	0	0.3	3.45	5.73	15.94	14.76	13.32	0.18	0	0.18	29.77	18.52	5.54	6.43	4.39	4.99	0.35	0	0	0.36	0.16	0
gene-KI387_019382	bHLH	0	0	1.45	0	0	0	0	0	0	0	0	0	0	0	0	0	0	0	0	0	0	0	0	0	0	21.93	30.77	28.91	65.29	61.68	69.43	0	0	0	57.88	46.75	36.72	6.89	16.65	22.27	0	0	0.89	0	0	0
gene-KI387_019403	NAC	19.64	27.78	24.53	17.18	17.02	43.16	13.86	19.91	18.19	18.56	14.91	24.25	15.51	26.08	29.32	24.49	35.3	34.34	35.78	15.42	12.69	12.97	29.6	25.27	26.26	47.89	43.03	47.72	89.34	83.27	84.97	34.77	37.07	38.59	44.95	42.55	35.66	76.57	69.72	59.51	43.72	38.2	38.58	36.12	39.92	34.53
gene-KI387_019424	bHLH	2.32	3.44	4.24	1.53	65.94	0.12	0.25	0	0	0.23	0.23	0	0	0	0	0	180.83	178.07	173.56	1.95	24.34	18.7	40.86	49.26	43.66	1.05	1.98	1.56	0	0	0	7.82	9.61	10.18	2.23	1.81	0.89	0.3	0.24	0.51	8.09	16.85	16.4	17.35	17.2	13.82
gene-KI387_019427	bHLH	0	0	0	3.04	0	0	0	0	0	0	0	0	0	0	0	0.3	0	0	0	0	0	0	6.1	4.84	3.97	0	0	0	0	0	0	0	0	0	0	0	0	0	0	0	0	0.61	0.93	0.25	0	0
gene-KI387_019479	bHLH	0	0.4	0	0	0.35	0	5.41	11.88	9.2	12.87	6.04	15.92	4.54	9.79	14.68	18.03	1.01	4.05	5.44	1.44	1.41	0.41	6.71	6.75	7.63	0.32	0.5	0.51	1.58	0.77	0.81	9.94	9.6	6.09	0.93	1.18	0.93	1.87	2.73	3.21	7.48	7.47	7.07	24.4	17.44	20.11
gene-KI387_019481	bHLH	0	0	0	0	0.68	0	3.22	5.22	5.42	5.76	2.48	11.05	0.44	3.28	8.08	9.88	4.46	4.83	6.94	0.65	0.74	0.89	3.1	2.52	4.59	0	0	0	0.27	0.78	0.56	6.7	7.88	11.42	0	0	0.78	1.6	2.77	1.31	10.02	10.91	9.56	17.7	15.51	18.45
gene-KI387_019497	GARP-G2-like	0	0	0	0	0	0	0	0	0	0	0	0	0	0	0	0	0	0	0	0	0	0	0	0	0	0	0	0	0	0	0	0	0	0	0	0	0	0	0	0	0	0	0	0	0	0
gene-KI387_019580	bHLH	16.9	96.14	19.11	77.52	11.83	16.42	31.24	21.83	56.66	22.54	65.59	42.74	17.47	28.84	65.67	39.87	115.05	96.51	124.71	10.91	14.78	9.16	240.4	246.57	240.6	26.29	34.39	21.58	163.07	170.22	157.7	451.36	401.92	438.48	72.46	25.11	31.18	179.85	159.24	149.39	128.26	152.72	179.13	242.87	284.65	287.37
gene-KI387_019664	MADS-M-type	6.17	1.47	1.21	2.57	0.86	0	0	0	0	0	0	0	0	0	0	0	0	0	0	0	0	0	0	0	4.61	3.81	17.5	30.41	21.09	19.25	4.34	21.8	31.26	30.26	46	26.53	4.76	14.63	15.87	0	0	0	0	0	16.91	16.43
gene-KI387_019713	bHLH	0	0	0	0	0	0	0	0	0	0	0	0	0	0	0	0	0	0	0	0	0	0	0	0	0	0	0	0	0	0.97	0	0	0	0	0	0	0	0	0	0	0	0	0	0	0	0
gene-KI387_019866	C3H	7.99	9.73	7.56	6.55	13.54	20.54	9.33	12.3	7.7	9.85	5.11	12.76	10.55	13.74	16.08	11.3	18.99	21	18.8	19.25	14.74	13.13	14.72	12.64	12.05	17.45	12.48	16.95	14.94	13.95	16.8	17.15	16.66	20.07	19.34	20.49	14.43	18.27	19.25	20.17	14.51	12.01	13.23	13.21	15.68	11.45
gene-KI387_019877	C3H	17.03	28.32	17.13	20.71	13.53	41.84	5.8	10.29	8.6	10.9	9.28	10.83	7.35	11.84	7.63	9.98	11.38	13.5	10.68	14.87	10.99	12.47	34.07	35.02	36.34	37.92	29.33	33.8	33.15	26.38	28.52	45.97	49.89	44.65	31.58	30.17	29.5	43.91	40.21	42.19	47.99	45.75	45	68.65	56.37	60.32
gene-KI387_019922	RWP-RK	0	0	0	0	0	0	0	0	0	0	0	0	0	0	0	0	0	0	0	0	0	0	0	0	0	0	0	0	0	0	0	0	0	0	0	0	0	0	0	0	0	0	0	0	0	0
gene-KI387_019928	bHLH	7.58	10.18	6.22	23.69	2.81	0	0	0	0	0	0	0	0	0	0	0	0.23	0.72	0.05	0	0	0.04	79.53	77.5	78.44	6.95	9.72	6.16	30.59	23.85	23.71	50.84	50.41	54.06	10.52	9.88	7.21	11.46	10.75	8.65	95.79	105.14	106.47	102.71	108.3	102.29
gene-KI387_019993	NAC	0	0.25	0.14	0	0.11	0	0	0	0	0	0	0	0	0	0	0	0	0.07	0	0	0	0	0.42	0.12	0.26	0.39	1.01	0.41	1.39	2.38	1.14	0	0	0.11	2.51	0.83	0.41	0.14	0.33	1.42	0	0	0	0	0	0
gene-KI387_020011	AP2/ERF-ERF	22.86	18.35	13.05	19.55	16.59	11.24	12.69	14.11	13.71	20.28	20.01	12.59	15.19	17.28	17.34	14.03	9.87	13.84	10.13	11.3	12.15	9.02	21.62	19.14	18.07	21.33	36.02	26.28	26.42	17.94	22.69	44.49	49.4	50.36	24.46	27.43	24.59	31.68	25.05	29.39	27.3	41.7	30.51	48.21	46.68	43.66
gene-KI387_020044	WRKY	16.6	26.74	20.2	27.82	2.81	12.02	0	7.53	12.39	18.04	5.2	18.56	0	0	6.84	16.94	11.86	7.82	27.29	10.37	12.76	7.69	43.37	59.39	51.69	81.03	51.1	92.83	77.88	51.24	69.72	83.9	67.65	54.81	77.82	69.57	44.9	29.18	35.42	44.44	90.59	112.37	118.32	144.23	90.16	134.2
gene-KI387_020096	CAMTA	17	19.98	20.23	18.45	14.54	18.29	13.18	13.84	12.53	16.23	9.91	18.31	15.91	14.84	20.6	16.84	20.76	20.77	18.02	19.29	16.93	15.49	16.48	15.88	14.96	25.37	28.92	28.78	24.55	22.85	24.09	18.6	19.8	19.38	34.13	33.29	29.64	19.81	21.74	23.68	15.17	19.48	18.51	17.41	16.31	14.74
gene-KI387_020107	MYB-related	7.53	8.41	5.76	4.88	5.36	5.89	5.66	6.29	6.78	8.38	4.71	5.67	5.62	6.9	7.38	7.21	8.93	8.91	7.24	7.45	6.76	6.23	20.34	21.69	21.15	13.14	16.5	17.6	22.95	20.32	16.81	45.26	43.62	41.69	18.77	16.53	14.63	20.75	22.82	22.66	21.69	29.98	29.72	40.37	35.63	33.53
gene-KI387_020110	DBP	17.18	8.18	7.2	6.96	6.74	7.44	6.55	8.53	7.08	5.85	6.54	8	4.93	6.56	8.25	7.35	16.93	21.48	18.98	11.72	9.07	9.91	17.95	17.29	16.56	9.03	7.31	12.22	11.47	11.62	9.77	25.31	25.91	21.45	10.92	9.99	9.39	18.55	16.94	12.86	19.47	25.32	17.59	31.72	33.45	30.78
gene-KI387_020314	Trihelix	0	0	0	0	0	0	0	0	0	0	0	0	0	0	0	0	0	0	0	0	0	0	0	0	0	0	0	0	1.47	0	0.56	0	0	0	0	0.65	0	0	0	0	0	0	0	0.64	0	0
gene-KI387_020385	MYB	1.6	7.05	2.53	1.58	1.17	0.22	0.15	0.42	0.75	1.9	1.51	3.2	0.37	2.13	5.48	3.97	9.8	6.66	9.96	5.16	4.5	4.03	0.69	0.76	1.59	3.06	5.38	5.59	2.55	4.1	2.76	5	3.47	5.11	11.68	11.03	9.49	17.24	16.17	18.4	1.12	3.04	0.92	5.07	5.26	4.43
gene-KI387_020391	E2F-DP	0.21	0.34	0.81	0.48	3.42	6.93	1.19	2.06	0.78	0.63	0	0.23	0.86	0.64	0.64	0.72	10.75	9.81	10.13	18.77	18.04	13.24	3.73	4.76	4.73	0.71	0.98	0.33	0.9	1.26	0.92	8.23	7.73	7.18	1.95	0.67	1.15	0.91	1.43	0.29	0.55	1.05	1.6	5.28	3.79	4.83
gene-KI387_020447	C2H2	0	0	0	0	0	0	0	0	0	0	0	0.55	0	0	0	0	0	0	0	0	0	0	0	0	0	0	0	0	0	0	0	0	0	0	0	0	0	0	0	0	0	0	0	0	0	0
gene-KI387_020472	PLATZ	22.71	86.43	51.21	42.12	36.75	20.05	13.12	18.23	19.12	16.1	19.77	23.85	35.62	23.11	35.7	20.12	24.09	25.87	23.81	25.14	23.86	20.16	13.89	15.04	11.72	55.13	70.69	72.59	10.53	13.72	11.4	37.65	40.73	36.76	38.22	36.95	81.5	10.53	12.48	15.02	7.5	4.56	5.94	6.66	9.28	5.29
gene-KI387_020501	bZIP	38.03	42.66	33.16	37.84	26.32	30.56	30.87	40.62	32.77	41.77	34.08	48.03	44.65	53.4	54.07	41.95	23.21	23.86	21.59	22.07	18.91	15.95	44.75	44.39	37.69	59.58	61.21	62.29	54.28	46.3	49.72	65.13	63.82	71.58	68.71	63.61	55.92	73.01	72.24	80.09	54.8	56.38	58.89	81.31	76.26	69.25
gene-KI387_020646	HB-other	4.03	0	0	0	14.16	4.3	10.34	13.95	48.67	13.09	38.5	46.02	9.97	32.87	42.64	64.68	80.52	88.36	49.53	93.91	93.2	69.14	4.42	0.83	1.88	0	0	0	0	0.75	0	0.85	0	0.87	0	0	0.8	0.99	0	0	0	0	3.8	0	0	0
gene-KI387_020667	HB-KNOX	0	0.36	0.43	0.26	16.22	0.58	11.06	16.66	20.92	12.83	27.32	28.25	12.15	23.36	48.24	31.04	45.67	58.54	42.68	32.44	34.21	32.14	66.99	65.72	69.86	0.58	0.52	0.53	47	41.57	40.67	73.47	70.24	74.77	1.58	0.81	1.23	19.18	13.14	16.33	83.99	83.09	89.05	101.23	103.36	98.1
gene-KI387_020687	HB-other	25.24	14.39	15.54	14.5	21.85	43.53	43.41	34.79	44.52	31.58	29.98	38	53.44	34.57	44.64	32.79	25.42	26.24	30.12	22.33	25.45	22.55	34.32	32.31	30.87	50.32	55.91	48.96	90.01	84.74	90.12	25.54	26.83	24.56	71.62	90.79	67.02	60.46	59.55	54.8	60.31	47.98	42.17	27.93	29.03	29.57
gene-KI387_020822	TCP	0	0	0	0	0	0	0	0	0	0	0	0	0	0	0	0	0	0	0	0	0	0	0	0	0	0	0	0	0	0	0	0	0	0	0	0	0	0	0	0	0	0	0	0	0	0
gene-KI387_020837	CPP	13.84	16.03	19.22	12.56	9.25	1.96	24.9	32.7	35.8	43.49	32.43	45.46	22.41	33.54	49.52	43.93	43.92	38.53	36.6	34.94	31.54	28.83	20.18	15.71	18	37.74	34.91	31.82	36.35	29.97	30.08	17.3	16.18	14.48	44.25	43.12	58.34	33.54	46.15	40.23	38.88	33.57	36.1	29.99	25.16	28.78
gene-KI387_020914	GRAS	0	0	0	0	0	0	0	0	0	0	0	0	0	0	0	0	0	0	0.06	0	0	0	0	0	0	0	0	0	0	0	0	0	0	0	0	0	0	0	0	0	0	0	0	0	0	0
gene-KI387_020934	LOB	0	0	0	0	0	0	0	0.59	0	0	0	0	0.42	0	0	0	0	0	0	0.25	0	0	0	0	0.51	0	0	0	0	0	0	0	0	0	0	0	0	0	0	0	0	0	0	0	0	0
gene-KI387_020944	C3H	36.76	37.8	47.44	25	56.97	103.36	65.2	102.31	81.29	111.47	76	109.86	67.69	108.46	102.52	116.97	92.15	101.24	93.19	66.71	57.93	49.56	122.9	136.78	128.23	46.91	49	51.54	58.19	70.51	67.46	215.33	208.85	194.43	58.5	58.33	59.24	105.26	79.42	78.3	127.59	132.34	141.63	282.12	285.86	294.95
gene-KI387_020945	C2C2-GATA	0	0.1	0	0	0.06	0	0	0.45	0	0	0	0.71	0	0	1.22	1.25	0	0.08	0	0.26	0.56	0.22	0	0	0	0	0	0	0.17	1.13	1.62	0	0	0	0	0	0	3.37	4.39	3.71	0	0	0	0	0	0
gene-KI387_021133	NF-YB	7.84	19.35	14.79	11.76	1.74	6.95	0	0	0	8.47	43.65	0	0	0	9.56	0	2.94	14.66	13.4	5.16	7.38	4.19	6.84	0	0	3.91	13.48	11.7	5.41	11.84	8.91	22.35	0	5.18	12.86	5.45	9.77	9.99	8.14	0	0	4.46	0	0	4.34	4.21
gene-KI387_021176	bHLH	34.85	70.6	31.36	69.02	14.92	22.48	32.34	33.07	32.35	25.09	32.67	26.1	39.32	35	51.05	25.57	6.58	7.8	6.82	11.19	9.76	7.09	77.84	77.25	75.23	60.14	69.77	56.89	77.04	70.14	71.78	102.48	108.63	115.43	91.39	76.75	60.54	44.94	51.38	53.83	39.41	56.22	47.16	106.64	100.68	90.48
gene-KI387_021330	LOB	0	0	0	0	0	0	0	0	0	0	0	0	0	0	0	0	0	0	0	0	0	0	0	0	0	0	0	0	0	0	0	0	0	0	0	0	0	0	0	0	0	0	0	0	0	0
gene-KI387_021404	MYB	0	0.07	0	0	0.34	0.38	0.08	0.19	1.02	0.15	2.54	0.9	0	0.27	4.4	0.89	3.78	2.16	4.86	8.37	9.05	7.48	0.22	0.38	0.42	0.76	1.11	0.81	1.1	0.25	0.65	0.55	0.44	0.63	2.62	1.58	1.12	0.88	0.61	0.84	0.27	0.11	0.17	0.64	0.57	0.53
gene-KI387_021406	bZIP	1.76	0	0	9.27	3.36	0	0.67	10.13	0	0	0	1.18	0.58	0	0	0.58	0	2.09	0	6.16	0.73	0	0	0	0	0	4.37	0	0	8.12	0	0	12.59	0	3.6	0	13.71	0	0	0	1.09	0	0.52	0	0	0.02
gene-KI387_021419	MYB	0	0	0	0	0	0	0	0	0	0	0	0	0	0	0	0	0	0	0	0	0	0	0	0	0	0	0	0	0	0	0	0	0	0	0	0	0	0	0	0	0	0	0	0	0	0
gene-KI387_021497	bHLH	4.7	2.15	4.97	1.01	16.08	27.07	10.05	8.22	17.32	12.32	40.51	25.16	2.47	17.23	24.06	21.84	52.49	52.3	45.25	53.13	49.58	43.66	16.53	15.61	15.06	4.68	6.15	6.51	16.01	19.05	21.02	20.12	22.48	21.15	12.6	10.44	6.13	16.36	18.54	20.89	3.45	5.52	5.8	10.61	12.34	11.62
gene-KI387_021524	TUB	17.86	20.73	22.41	24.03	11.34	25.05	31.73	22.68	26.1	24.51	13.41	39.91	23.43	18.92	22.43	35.55	12.22	16.73	11.53	8.36	5.15	6.83	38.85	45.12	41.77	43.61	41.59	45.39	46.5	40.71	40.49	49.21	49.58	52.39	49.14	61.46	39.74	58.31	59.4	59.79	92.39	110.1	106.49	71.41	74.76	76.49
gene-KI387_021548	MYB	5.4	7.25	5.71	5.1	11.84	14.99	19.58	24.29	19.71	20.19	16.28	22.86	22.16	25.16	33.9	21.56	18.3	18.7	18.16	16.45	13.59	11.87	19.14	19.29	17.68	11.31	10.83	11.68	18.08	15.31	17.38	23.4	22.64	25.75	12.78	15.09	11.07	22.15	21.75	22.65	24.01	21.71	20.11	16.44	17.32	16.27
gene-KI387_021593	TCP	0	0	0	0	0	0	0	0	0	0	0	0	0	0	0	0	0	0	0	0	0	0	0	0	0	0	0	0	0	0	0	0	0	0	0	0	0	0	0	0	0	0	0	0	0	0
gene-KI387_021667	NAC	17.87	54.26	35.19	27.79	25.21	29.17	58.65	68.58	58.83	56.46	38.36	76.05	56.26	60.78	101.96	66.86	27.23	31	26.22	32.96	31.94	26.04	56.79	49.96	49.99	75.68	93.23	81.98	161.19	129.67	139.44	48.84	50.6	48.32	102.83	103.27	80.46	133.29	114.97	115.51	103.13	102.62	103.53	65.04	63.19	56.8
gene-KI387_021833	MYB	0	0	0	0	0	0	0	0	0	0	0	0	0	0	0	0	0	0	0	0	0	0	0	0	0	0.27	0	0	0	0	0	0	0	0	0	0	0	0	0	0	0	0	0	0	0	0
gene-KI387_022001	C2H2	0	0.13	0.11	0	0.13	0	0	0	0.14	0	0	0.18	0	0.29	0	0.22	0	0.13	0	0	0.23	0	0	0.18	0.67	0	0.13	0	0	0.13	0	0	0	0	0.16	0	0.2	0	0	0.2	0	0.22	0	0	0	0
gene-KI387_022046	bHLH	0.15	0.73	0.25	0	0	0	0	0.7	0.41	0.37	0	1.39	0	0.22	0.19	0.98	0	0	0	0	0	0	3.07	4.09	3.59	0.7	0.74	0.56	5.05	6.2	7.34	5.06	6.77	6.63	0.21	0.43	0.74	14.63	8.97	10.74	4.11	5.66	4.72	5.74	7.18	7.31
gene-KI387_022147	C2C2-CO-like	3.24	1.37	5.58	0.54	0	0	0	0	0	0	0	0	0	0	0	0	0.16	0	0	0	0	0	0.13	0	0.12	33.27	35.75	41.38	14.87	16.48	18.2	0.43	0.31	0.1	67.8	58.44	80.75	31.75	35.63	39.93	0	0	0	0	0.09	0
gene-KI387_022173	MYB-related	2.49	6.5	4.51	1.98	5.59	0.98	0.98	2.86	0.76	1.82	0.91	3.04	1.25	1.33	2.82	2.7	4.32	8.95	6.18	7.01	7.66	7.14	23.54	25.28	19.31	49.71	45.21	55.67	19.81	30.38	26.03	23.59	18.87	26.44	57.58	48.93	50.51	24.92	24.88	27.61	23.9	14.02	14.93	24.88	12.62	19.31
gene-KI387_022184	MYB-related	0	0	0	0	0	0	40.69	61.28	50.19	19.85	118.9	0	9.2	11.12	178.32	69.64	24	9.65	12.95	26.68	19.21	8.21	0	23.53	14.65	30.18	29.98	9.15	50.13	32.46	40.24	0	0	20.2	40	25.68	17.29	34.88	47.49	66.85	50.94	25.84	0	18.94	5.09	19.68
gene-KI387_022210	LOB	5.79	14.04	12.06	7.87	78.42	123.73	66.3	54.37	62.88	53.47	55.52	50.68	32.31	79.64	61.51	46.81	342.32	370.43	345.13	319.77	291.17	261.33	188.74	177.35	180.21	69.31	50.38	50.19	70.15	61.33	71.34	174.9	149.24	166.29	56.35	66.63	49.26	39.57	39.27	34.48	204.54	197.87	223.99	229.4	241.29	242.29
gene-KI387_022293	Trihelix	0	0	0	0	0	0	0	0	0	0	0	0	0	0	0	0	0	0	0	0	0	0	0	0	0	0	0	0	0	0	0	0	0	0	0	0	0	0	0	0	0	0	0	0	0	0
gene-KI387_022311	HSF	10.06	9.11	11.46	6.48	9.18	7.61	8.34	12.34	12.2	18.57	7.85	24.41	8.16	9.44	11.71	21.17	11.19	11.45	11.84	10.66	10.19	8.45	44.49	46.1	45.7	40.74	38.99	29.61	51.35	33.51	36.86	30.96	29.75	35.69	62.45	71.85	42.83	29.9	22.31	23.65	110.77	109.93	106	50.34	53.05	51.61
gene-KI387_022384	PLATZ	4.05	4.62	0.86	3.6	0.45	0	0	0.23	1.64	1.11	0.55	4.93	0	1.08	1.14	2.43	2.78	4.01	3.02	4.16	4.99	3.35	11.9	15.76	15.15	2.78	4.73	7.02	14.24	20.64	15.28	41.98	42.25	40.38	4.3	3.2	5.16	36.73	35.53	42.09	8.13	9.43	14.2	69.25	62.32	70.73
gene-KI387_022387	AP2/ERF-ERF	0	0	0	0	0	0	0	0	0	0	0	0	0	0	0	0	0	0	0	0	0	0	0	0	0	0	0	0	0	0	0	0	0	0	0	0	0	0	0	0	0	0	0	0	0	0
gene-KI387_022545	HB-HD-ZIP	175.33	358.88	417.81	838.54	20.35	20.62	106.79	56.65	143.04	93.59	317.01	150.83	36.48	66.78	272.72	146.21	64.24	58.9	77.91	183.79	156.68	134.69	0.49	0.42	0.78	78.94	87.85	83.1	2.3	2.69	2.19	1.23	1.06	2.01	70.65	64.62	81.5	2.63	3.37	5.99	0.27	0.51	0.51	1.65	2.33	2.24
gene-KI387_022556	bZIP	42.9	89.38	74.6	80.75	35.76	28.5	23.79	46.76	32.61	48.71	36.39	53.17	30.26	46.37	64.61	54.82	96.05	122.87	102.55	68.74	68.43	62.34	134.62	127.3	147.04	155.46	187.03	167.51	309.92	296.54	292.58	107.05	108.01	114.95	251.21	229.92	174.96	301.53	257.11	273.5	118.05	164.59	156.22	121.18	113.94	105.67
gene-KI387_022575	bHLH	0	0	0	0.13	0	0	0	0	0	0	0	0	0	0	0	0	0	0	0	0	0	0	0	0	0	0.17	0.36	0.37	5.5	4.84	4.1	0	0	0	0.41	0.64	0	5.5	4.14	2.98	0	0	0	0	0	0
gene-KI387_022576	bHLH	0	0	0	0	0	0	0	0	0	0	0	0	0	0	0	0	0	0	0	0	0	0	0.36	0	0.67	0.49	0	0	24.49	19.54	19.95	0	0	0.29	0	0	0	18.76	18.75	12.1	0	0	0	0	0	0
gene-KI387_022742	C2H2	34.75	39.58	26.4	25.53	93.36	108.22	20.42	44.92	22.92	24.32	22.12	31.48	27.57	25.32	35.07	22.91	55.07	66.63	58.13	42.32	38.76	51.92	51.43	75.84	73.52	51.16	49.5	47.49	88.18	82.7	82.15	59.62	59.37	55.68	70.6	74.25	49.06	95.16	121.43	101.03	71.09	70.92	94.04	67.9	69.31	55.01
gene-KI387_022826	AP2/ERF-ERF	0	1.19	0	0	0.15	1.18	0	0.89	0	0.35	0	1.57	0	0	0.74	1.87	0	0	0	0	0	0	0	0	0	0	0	0	0	0.32	0	0	0	0	0	0	0	23.34	7.86	17.05	0	0	0	0	0	0
gene-KI387_022894	AP2/ERF-ERF	0	0	0	0	0	0	0	0	0	0	0	0	0	0	0	0	0	0	0	0	0	0.16	0	0	0	0	0	0	0	0	0	0	0	0	0	0	0	0	0	0	0	0	0	0	0	0
gene-KI387_022918	HB-PHD	4.48	7.26	7.85	5.14	8.56	7.87	7.96	9.89	10.94	10.54	6.44	14.82	7.68	9.87	13.9	14.16	23.66	23.26	20.45	20.29	15.46	13.63	13.74	15.28	15.95	15.36	16.17	14.16	15.57	13.83	16.38	27.02	28.46	30.54	22.49	17.89	19.07	23.69	20.83	21.74	19.39	22.81	17.87	36.6	38.46	32.75
gene-KI387_022952	HB-HD-ZIP	0	0	0	0	0	0	0	0	1.07	0	0	0	0	0	0.67	1.28	0	0	0.42	0.19	0.31	0	0.42	0	0	0	0	0	0	0.3	0.3	0	0	0	0	0	0	0	0	0	0.33	0.81	0.31	0	0	0
gene-KI387_022953	bZIP	16.05	17.13	16.68	16.82	10.38	12.37	14.55	14.87	11.51	13.58	12.69	19.29	14.24	19.48	20.25	17.92	15.21	16.8	14.71	14.78	13.2	12.27	28.28	28.11	30.96	40.69	49.15	50.97	45.16	45.72	40.49	20.12	21.35	18.5	41.73	33.99	36.56	63.82	80.7	81.15	11.17	18.55	16.92	20.05	20.01	17.75
gene-KI387_022966	BES1	92.58	78.76	90.86	112.99	78.22	162.34	35.67	62.42	32	97.62	34.31	94.07	36.44	64.38	46.16	96.31	81.4	81.31	77.49	80.64	78.97	66.08	402.69	407.54	392.45	158.22	151.66	100.15	331.8	242.53	305.26	178.65	160.39	188.23	284.9	368.6	205.73	94.69	84.25	99.71	456.84	460.91	468.64	265.13	278.27	289.12
gene-KI387_023196	Trihelix	0.73	1.06	0.1	0.21	0.77	1.02	1.73	1.28	0.64	1.16	0.29	2.58	1.44	1.19	2.66	1.14	0.96	1.18	1.12	1.74	1.42	0.62	1.22	1.37	4.01	1.26	0.73	1.04	0.4	1.14	1.05	1.51	2.74	3.95	0.82	0.51	0.3	0.4	0.48	1.2	0.16	0.41	0.24	1.01	0.3	0.49
gene-KI387_023203	bHLH	5.19	14.21	9.59	9.81	5.03	1.93	6.92	10.55	10.21	8.09	11.78	10.43	5.42	8.43	13.21	13.28	10.59	9.29	11.26	7.43	9.64	10.13	8.48	7.75	8.07	6.91	16.27	9.59	23.13	27.1	21.61	11.99	9.65	9.72	27.16	14.84	11.97	64.12	63.76	55.93	9.19	12.32	9.22	9.09	8.62	7.28
gene-KI387_023224	HB-WOX	7.77	9.22	6.91	6.36	5.8	6.11	3.19	6.64	4.41	3.78	4.15	6.72	3.91	6.65	7.45	6.34	7.75	9.32	9.24	7.47	8.06	5.44	7.05	7.27	6.11	7.23	9.53	7.23	12.27	14	13.85	12.83	12.1	11.56	8.78	9.11	8.25	16.53	11.05	10.97	4.11	5.87	6.72	8.06	11.08	8.47
gene-KI387_023242	bHLH	0	0.12	0	0.05	0.11	0	0	0	0	0.07	0	0	0	0	0.07	0.09	2.34	1.5	2.24	0.26	0.12	0.27	1.45	1.25	1.48	0.07	0.21	0.43	6.9	6.37	7.78	2.11	2.26	1.97	0.48	1.31	0.49	8.29	10.39	6.43	0.48	0.4	1.14	0.32	0.29	0.31
gene-KI387_023288	Trihelix	5.52	16.99	12.03	3.86	4.17	0.24	0.82	0.95	1.51	1.29	1.53	2.91	0.07	1.76	9.34	4.14	15.94	21.75	15.47	10.9	11.13	14.26	10.68	7.77	9.13	18.77	23.63	22.92	26.71	27.31	33.55	7.84	8.24	11.97	29.26	24.89	32.23	42.35	43.78	43.03	22.19	14.18	18.81	10.82	9.91	9.22
gene-KI387_023303	GRAS	1.91	0.23	0.58	1.88	0	0	0	0.42	0.37	0	0	0	0	0	0	0	0	0	0	0.79	0.16	0	0	0	0	0.58	0	0	0.41	0	0	0	0	0	0	0	0	0	0	0	0	0	0	0	0	0
gene-KI387_023359	WRKY	0	0	0	0	0	0	0	0	0	0	0	0	0	0	0	0	0	0	0	0	0	0	0.88	0.72	0.4	0	0	0	0	0	0	0	0	0	0	0	0	0	0	0	0.35	0.86	0.33	0	0	0
gene-KI387_023368	Trihelix	20.06	21.94	21.46	17.15	18.44	26.6	31.55	41.11	33.38	32.67	41.69	48.26	36.85	39.89	45.97	50.87	31.04	32.93	33.8	23.72	20.91	21.28	25.51	24.5	20.44	52.75	59.11	57.24	47.34	49.38	52.95	25.36	24.67	31.05	54.66	54.53	59.67	64.58	60.28	63.08	28.08	26.8	25.71	26.61	28.7	23.08
gene-KI387_023418	LOB	0	0	0	0	0.13	0.43	2.75	1.79	3.46	1.71	5.34	0.42	0.52	1.32	2.95	1.13	0.2	0.16	0.39	0	0	0	0.74	0.62	0.34	0	0.8	0.27	1.09	2.7	1.36	0	0	0	0.59	1.88	0	0.36	1.15	0.93	0	0.37	0	0	0	0
gene-KI387_023430	C3H	0	0	0	0	0.06	0.78	0	0	0	0	0	0	0	0	0	0	0	0	0	0	0	0	0	0	0	0	0	0	0	0	0	0	0	0	0	0	0	0	0	0	0	0	0	0	0	0
gene-KI387_023468	MADS-MIKC	0.85	2.84	3.77	2.88	7.19	3.27	4.25	3.06	1.75	6.41	3.79	4.81	3.66	6.52	2.64	7.65	0	0	0	0	0	0	0	0	0	4.55	5.52	4.18	13.01	14.45	5.59	3.4	2.07	3.45	7.3	7.25	10.74	12.02	12.71	16.76	0	0	0	1.43	1.86	1.3
gene-KI387_023480	MADS-MIKC	1.6	4.61	13.18	2.46	3.53	0.86	1.08	1.28	1.12	0.51	0	4.53	0.46	1.18	1.08	0.68	0	0	0	0	0	0	0	0	0	2.02	10.77	4.69	32.33	36.97	38.98	0.48	0	0	2.84	1.52	3.08	24.12	24.56	16.85	0	0	0	5.5	3.95	7.89
gene-KI387_023516	B3	0	0	0	0	0	0	0	0	0	0.05	0	0	0	0.06	0	0	0	0	0	0	0	0	0	0	0	0	0	0	0	0	0	0	0	0	0	0	0	0.07	0.06	0.31	0	0	0	0	0	0
gene-KI387_023546	Trihelix	0	0	0	0	0	0	0	0	0	0	0	0	0	0	0	0	0	0	0	0	0	0	0	0	0	0	0	0	0	0	0	0	0	0	0	0	0	0.11	0	0	0.09	0	0	0	0	0
gene-KI387_023628	RWP-RK	2.29	4.01	2.68	4	2.31	4.61	1.66	1.58	1.6	1.51	2.23	2.09	1.91	1.68	2.82	1.9	1.97	2.15	1.24	2.85	2.3	1.56	3.2	2.63	2.77	6.79	5.19	5.69	3.55	3.3	3.89	4.61	4.15	4.88	4.62	4.79	4.01	6.93	7.22	5.93	3.21	2.83	2.88	4.72	6.01	4.71
gene-KI387_023650	MADS-MIKC	0	0	0	0	0	0	0	0	0	0	0	0	0	0	0	0	0	0	0	0	0	0	0	0	0	0	0.24	0.24	21.45	27.25	22.72	2.21	2.97	3.81	0	0	0	8.89	7.55	7.31	0	0	0	0.84	1.49	1.59
gene-KI387_023677	HB-other	10.3	10.24	11.16	6.6	8.16	4.45	7.27	11.22	7.13	9.21	3.42	11.45	8.21	13.74	14.25	11.04	17.06	18.2	17.73	12.82	11.34	10.67	25.61	24.03	24.37	18.38	20.44	21.67	19.92	17.86	19.71	42.9	44.36	48.93	25.29	25.43	24.4	19.11	17.44	18.33	14.23	18.29	17.7	37.34	38.73	33.18
gene-KI387_023766	TUB	0.19	0	0	0.08	1.25	4.6	0.57	0.27	0.59	0.43	0.86	1.57	0.1	0.87	2.38	0.97	2.18	1.42	1.79	2.75	1.46	0.87	1.06	1.16	2	7	10.13	9.68	7.52	9.97	9.27	1.51	0.97	1.72	8.76	10.71	10.11	5.28	3.93	5.49	1.96	2.48	2.24	1.01	1.01	1.33
gene-KI387_023796	B3-ARF	8.37	15.5	13.2	7.4	8.05	3.44	5.49	5.22	3.83	4.65	3.58	8.61	7.59	7.43	9.4	6.14	20.58	21.76	20.18	17.75	14.96	11.59	22.24	22.08	20.45	35.54	37.18	37.78	47.22	45.85	44.45	20.26	22.35	24.66	36.64	43.59	47.23	86.32	81.66	89.7	26.33	26.43	27.16	28.6	27.13	25.06
gene-KI387_023819	WRKY	7.57	4.42	2.65	3.7	16.86	2.75	1.7	3.51	4.82	5.56	7.38	11.24	1.09	3.24	4.61	11.12	57.49	51.7	47.78	38.87	40.43	30.28	0	0	0	1.33	0	1.06	0.48	0.36	0.72	2.8	2.38	1.99	0	0.42	1.8	0.48	0	0	5.41	8.13	5.16	7.79	6.5	9.98
gene-KI387_023867	GARP-G2-like	0.31	1.81	0.77	1.07	0	0	0	0	0	0	0	0	0	0	0	0	0	0	0	0	0	0	0.59	1.43	0.53	4.37	5.5	2.51	3.41	4.64	1.72	1.43	1.9	2.38	4.19	2.49	3.89	3.39	1.79	1.95	2.75	1.13	1.31	0.49	0.43	0
gene-KI387_023928	NF-YC	12.3	14.59	16.06	23.88	16.98	11.8	15.11	12.92	10.91	25.96	17.15	15.27	17.13	21.66	27.72	12.03	12.04	7.89	13.19	7.59	10.07	9.22	19.23	25.14	17.08	10.42	14.29	9.94	19.76	12.76	10.53	29.88	47.58	40.76	18.09	21.51	23.84	22.91	12.47	21.35	34.13	52.41	48.71	57.87	29.59	25.55
gene-KI387_024023	MYB	0	0	0	0	0.27	0	0	0	0	0	0	0	0	0	0	0	3.54	3.17	0.85	1.15	0.94	2.6	0	0.76	0	3.24	2.81	7.47	8.33	4.79	3.55	0	1.59	0.79	6.04	9.14	7.98	3.64	2.17	3.18	0	1.78	0.7	1.64	3.54	7.38
gene-KI387_024027	Tify	2.93	4.23	1.87	1.4	0.2	0	0	0.51	0.68	0.61	0.41	0.3	0.56	0.24	0.84	0.54	2.7	0.5	0.9	1.37	2.43	1.52	3.6	6.98	3.1	3.99	6.97	7.26	62.52	70.71	55.85	10.5	8.01	7.85	15	11.92	10.5	54.85	62.09	54.38	4.22	4.17	4.03	6.22	10.03	12.95
gene-KI387_024168	MYB	3.07	3.85	3.28	0.48	0.11	0.06	0	0.13	0	0	0.11	0	0	0	0	0	0	0	0	0.24	0.19	0.2	64.12	70.13	69.6	35.27	30.24	21.86	187.48	156.77	158.2	3.15	4.01	4.06	36.48	51.4	34.48	43.97	46.16	48.65	31.38	43.42	38.93	9.46	14.4	11.41
gene-KI387_024171	bHLH	8.82	14.66	13.36	8.39	5.68	3.18	1.24	1.88	1.94	2.42	1.73	4.5	3.14	4.76	9.22	4.79	11.06	12.44	10.26	8.99	8.9	5.92	3.6	3.17	3.62	13.49	14.55	16.74	14.19	13.37	14.26	4.74	6.5	7.91	22.35	19.43	18.24	24.41	23.94	27.88	2.87	4.36	3.77	5.58	5.26	4.47
gene-KI387_024178	Trihelix	6.74	11.88	9.46	10.8	11.18	11.13	7.51	9.2	10.71	9.74	8.98	13.67	11.32	12.38	16.67	14.15	13.4	15.28	15	11.47	11.52	10.27	11.49	9.99	10.75	14.94	19.47	19.92	23.8	24	26.5	21.3	18.71	20.78	20.81	19.24	21.28	26.25	24.29	22.38	13.41	12.44	9.99	22.41	22.08	20.43
gene-KI387_024238	RWP-RK	7.3	7.08	7.23	11.22	19.37	19.99	15.4	13.08	12.09	12.45	8.08	15.82	19.99	15.2	17.73	14.8	11.53	11.44	9.4	11.6	9.22	7.44	15.79	16.81	17.31	12.2	9.28	12.03	8.58	7.99	6.99	15.48	14.6	16.52	10.48	9.79	8.29	10.07	8.43	9.38	27.12	26.46	25.81	14.43	13.96	13.77
gene-KI387_024265	Trihelix	6.6	8.86	6.1	6.06	5.05	9.54	5.64	5.06	7.08	5.75	9.75	7.08	7.18	9.06	11.35	7.09	7.2	8.26	5.46	6.6	6.53	6.8	7.1	6.19	4.43	13.9	17.23	14.37	11.59	10.32	11.85	8.68	9.72	9.82	16.8	16.09	11	9.36	8.22	11.51	3.32	2.94	3.42	7.3	8.43	8.85
gene-KI387_024268	bZIP	34.26	67.92	43.02	40.24	58.58	81.12	53.97	60.19	56.58	58.01	59.77	90.95	48.74	58.44	79.96	73.18	144.49	167.48	136.54	120.77	107.04	124.46	95.79	104.55	108.89	117.05	114.01	105	150.41	138.82	133.99	178.01	179.63	180.98	112.19	97.9	101.01	179.02	136.57	131.24	97.24	119.02	115.64	156.17	145.12	153.92
gene-KI387_024347	B3-ARF	0.08	0.34	0.1	0.03	0.48	0.33	0.13	0.98	0.64	0.95	0.46	1.22	0.26	0.53	0.38	1.4	3.01	3.63	2.24	1.35	1.11	0.96	2.67	3.42	3.95	0.89	1.23	1.49	2.14	2.37	3.03	2.81	2.45	3.07	1.1	0.82	0.71	6.38	5.61	5.59	2.1	1.77	2.5	0.41	0.68	0.54
gene-KI387_024367	VOZ	6.29	10.05	5.89	5.65	2.49	5.91	4.12	7.65	6.79	6.62	8.85	12.6	5.36	10.03	14.58	8.85	16.21	14.82	15.85	13.71	12.58	10.21	13.07	12.74	11.07	7.25	8.84	8.52	20.19	16.73	16.03	19.06	18.73	23.01	8.97	8.94	7.36	19.06	16.74	13.91	7.38	14.09	13.13	21.8	20.19	17.41
gene-KI387_024398	GRAS	0	0	0	0	0	0	0	0	0	0	0	0	0	0	0	0	0	0	0	0	0	0	0	0	0	0	0	0	0	0	0	0	0	0	0.2	0	0	0	0	0	0	0	0	0	0	0
gene-KI387_024399	GRAS	0	0	0	0	0	0	0	0	0	0	0	0	0	0	0	0	0	0	0	0	0	0	0	0	0	0	0	0	0	0	0	0	0	0	0	0	6.88	0	0	0	0	0	0	0	0	0
gene-KI387_024641	GARP-ARR-B	0.69	0.17	0.05	0.05	0	0	0	0	0	0	0	0	0	0	0	0	0	0	0	0	0	0	1	0.86	0.52	0.69	0.59	0.74	9.46	9.08	8.29	1.37	0.73	1.4	1.05	1.15	0.59	5.02	4.75	3.55	0.97	0.47	1.07	1.14	1.69	1.17
gene-KI387_024643	GARP-ARR-B	0.34	0	0.22	0	0	0	0	0.09	0	0	0	0	0	0	0	0.1	0	0	0	0	0	0	0.65	0.47	0.52	0	0	0	0	0	0.48	0.36	0.52	0.27	0.09	0	0	0.44	0.34	0.09	1.42	1.35	0.43	1.09	0.81	1.31
gene-KI387_024795	bHLH	53.61	52.88	30.88	63.72	57.65	0.96	4.73	11.02	9.27	12.77	9.86	21.45	10.08	12.34	25.46	22.65	46.83	44.23	45.81	30.8	39.87	26.88	43.73	43.42	41.9	22.5	24.73	20.36	58.96	56.01	59.68	44.35	51.73	57.63	41.72	36.98	25.66	39.86	36.69	30.88	27.12	27.05	27.52	63.79	61.25	60.43
gene-KI387_024881	bHLH	1.43	10.06	2.76	0.86	8.55	1.2	3.8	1.5	8.24	5.11	19.91	19.82	1.09	1.77	35	20.29	15.48	28.02	17.31	3.51	3.91	3.75	40.05	37.63	38.21	1.67	3.23	2.04	8.72	10.95	10.47	26.1	26.31	26.99	7.91	8.83	8.7	18.89	13.54	14.91	39.77	34.7	35.45	38.49	36.19	38.64
gene-KI387_024888	PLATZ	0	3.99	0.62	0.81	0	0	0	0	0	0	0	0	0	0	0	0	0.37	0	0.17	0	0.26	0	0.65	0	0	0.22	0.47	0	4.16	5.24	5.74	0.8	0.78	1.58	3.67	1.92	0.24	2.56	0.25	0	0.26	0	0	0.27	0.24	0.26
gene-KI387_024907	AP2/ERF-ERF	8.88	53.68	5.8	13.5	22.26	33.19	35.47	20.24	42.48	30.37	51.18	48.54	23.67	26.62	19.09	47.62	24.67	20.73	21.27	27.71	29.77	41.89	111.98	110.73	114.99	19.65	37.19	24.57	159.32	171.26	188.72	58.16	46.51	44.63	115.95	163.07	88.98	34.21	35.26	42.68	129.83	88.47	108.94	102.58	94.19	94.53
gene-KI387_024908	AP2/ERF-ERF	8.36	32.13	3.31	5.1	14.1	36.67	61.68	87.6	159.74	97.56	131.07	194.69	25.6	48.26	52.41	226.05	57.16	58.79	42.91	32.83	35.29	39.42	758.19	735.63	668.12	147.38	241.46	57.65	821.66	773.54	695.5	95.53	88.69	83.35	424.06	713.92	306.37	152.72	70.05	48.23	811.4	410.36	545.33	208.37	186.93	194.5
gene-KI387_024929	MYB	0	0	0	0	0	0	0	0	0	0	0	0	0	0	0	0	0	0	0	0	0	0	0	0	0	0	0	0	0	0	0	0	0	0	0	0	0	0	0	0	0	0	0	0	0	0
gene-KI387_024987	MYB	0	6.35	0.88	5.26	1.48	0	1.23	0.48	0.42	3.99	0.38	3.38	0.35	1.99	0.2	1.5	1.49	4.92	1.12	1.93	2.08	2.43	0	0	0	0	0.75	0.95	0.26	1.52	1.53	0	0	0	0.84	0.66	0	9.21	7.28	9.15	0	0	0	0	0	0
gene-KI387_024989	MYB	12.48	50.9	16.8	20.43	4.39	0	0	0	0.22	0	0.39	0	0	0	0	0	2.31	1.45	0.43	1.06	1.72	1.59	0	0	0	2.39	4.43	5.85	1.58	1.77	1.38	0	0	0	4.54	1.81	2.53	0.26	0.63	1.35	0	0	0	0	0	0
gene-KI387_025032	NAC	0	0.15	0.13	0.2	0	0	0	0	0	0	0	0	0	0	0	0	0	0	0	0	0	0	0.25	0.11	0	0	0	0	0.25	0	0	0.41	0.6	0.3	0.1	0.1	0.09	0	0.1	0.31	0.1	0	0.1	0.21	0.18	0.2
gene-KI387_025035	NAC	0.09	0.13	0.11	0	0.08	0	0	0	0	0	0	0	0	0	0	0	0	0	0	0	0	0	10.29	7.55	8.63	1.82	1.38	1.47	1.84	3.17	2.46	23.02	22.19	21.49	2.32	2.39	1.59	3.41	4.04	4.74	4.29	3.96	4.39	7.59	7.53	8.96
gene-KI387_025056	MYB	0.13	0.51	0.22	0	0.16	0.09	0	0	0	0	0	0	0	0	0	0	0	0	0	0.11	0	0	0	0	0	0	0.95	0.32	0	0	0	0	0	0	1.25	0.74	1.28	0	0	0	0	0	0.17	0.18	0	0
gene-KI387_025064	MYB-related	18.28	44.39	18.05	18.09	6.15	8.17	8.45	9.67	3.28	3.54	3.38	7.27	8.43	9.18	6.23	7.86	3.41	3.16	1.98	2.88	3.51	2.22	6.46	6.54	6.7	17.63	16.96	26.06	15.89	18.45	17.63	17.43	19.03	17.87	21.25	17.77	32.81	22.17	26.99	32.71	6.54	7.58	6.05	18.47	16.31	19.4
gene-KI387_025190	BES1	3.13	1.37	0.23	0	0.67	0	0.92	0	7.07	0.86	5	0	1.17	1.49	1.36	3.43	5.74	11	12.95	2.12	0.77	1.41	7.38	11.53	8.59	1.06	1.5	0.75	26.38	30.51	30.21	2.54	3.79	0.85	1.66	7.07	4.98	4.03	10.77	9.54	14.74	11.64	19.5	3.48	5.75	5.29
gene-KI387_025221	LOB	4.67	0.28	0	0.25	0	0.2	6.17	0.56	13.68	0	27.6	1.32	1.62	0.52	1.41	0	0	0	0	0	0	0	1.63	3.51	2.94	0	0	0	4.17	3.88	4.33	0	0	0	0	0	0	1.04	0.82	0	1.68	1.04	1.6	0	0	0
gene-KI387_025222	LOB	0	0	0	0	0	0	0	0	0	0	0	0	0	0	0	0	0	0	0	0	0	0	6.34	4.69	2.12	0	0	0	10.33	3.39	4.44	1.92	2	3.97	0	0	0	0	0	0	1.82	0	0	1.03	0	0
gene-KI387_025239	MYB	0	0	0	0	0	0	0	0	0	0	0	0.52	0	0	0	0.46	0	0	0.09	0	0	0	8.41	7.17	7.18	0	0	0	0.82	1.22	0.98	0.82	1.06	2.55	0	0	0	1.81	0.13	0	0.8	1.35	1.67	0	0.37	0.4
gene-KI387_025253	HB-WOX	0	0	0	0	0	0	0	0	0	0	0	0	0	0	0	0	0	0	0	0	0	0	0	0	0	0	0	0	0	0	0	0	0	0	0	0	0	3.09	3.94	3.5	0.14	0	0	0	0	0
gene-KI387_025391	LOB	13.16	103.11	28.05	79.63	42.9	2.61	14.17	47.13	25.13	38.26	60.67	57.84	18.77	76.14	51.41	65.44	6.16	7.39	2.09	5.2	5.75	8.81	4.03	5.11	5.26	13.26	16.78	27.71	10.87	13.05	12.23	50.62	46.43	44.33	56.03	40.67	53.69	79.47	68.55	137.14	19.69	21.32	21.28	64.15	60.09	68.71
gene-KI387_025476	HB-HD-ZIP	0.68	6.58	2.42	0.39	0	0	0	0.79	1.39	0.63	0	1.4	0	0.73	0.33	2.08	4.41	2.43	2.5	0.38	0.15	0.49	0	0	0	2.48	3.19	1.75	51.73	70.45	57.49	0.33	0	0	2.26	2.39	3.25	11.41	8.4	5.05	0.96	0	0	0.34	0.59	0
gene-KI387_025753	DBB	23.9	54.18	45.16	32.06	22.61	0	3.41	7.32	3.32	8.68	1.9	15.42	2.3	8.09	9.04	14.06	103.66	125.95	117.56	53.57	53.03	52.91	32.36	31.43	30.18	69.21	93.36	83.39	107.37	106.88	115.62	49.77	51.79	52.47	137.61	147.82	150.3	153.41	162.41	182.63	25.22	26.8	26.01	43.48	42.76	41.63
gene-KI387_025815	GRAS	0	0.72	0.68	0.77	0	0	0.14	0	0.07	0.12	0	0	0	0	0	0	0.06	0	0	0.05	0.12	0.13	0	0.08	0.08	0	0	0	0	0	0	0	0	0.07	2.48	2.45	3.42	6.16	4.11	4.48	1.14	1.06	1.06	1.69	2.23	2.06
gene-KI387_025816	GRAS	0.19	2.47	9.57	0.05	0.43	0.13	1.81	2.88	2.02	2.94	3.46	3.3	3.25	3.59	7.85	3.46	2.73	3.4	1.86	1.98	1.25	0.91	7.98	6.51	9.24	0	0	0.3	1.82	1.13	1.8	4.82	6.09	6.25	1.99	1.66	2.57	6.69	5.17	5.54	24.66	25.44	25.68	8.95	10.27	6.7
gene-KI387_025831	HB-HD-ZIP	20.35	21.74	16.08	11.82	7.97	5.38	4.69	5.53	6.22	8.19	13.04	14.13	3.7	8.38	21.21	15.23	33.56	30.64	28.81	33.06	27.37	22.7	15.02	16.73	16.79	18.61	26.06	19.62	30.72	31.31	30.2	16.37	16.67	18.64	31.69	34.39	20.59	40.72	32.08	26.97	28.53	28.89	26.25	17.24	25.85	20.79
gene-KI387_025845	NF-YC	9.15	12.68	7.16	13.6	11.99	9.61	7.89	12.82	8.99	13.81	10.4	12.74	15.99	10.98	12.79	14.48	9.98	11.1	10.85	10.3	7.41	9.11	40.41	31.49	37.92	27.18	21.5	21.35	23.55	25.31	27.15	28.24	27.94	24.02	22.05	21.6	20.27	32.02	30.56	27.21	22.8	31.12	27.72	15.51	22.78	20.74
gene-KI387_025870	SBP	2.4	0.88	1.62	4.64	1.19	0.86	1.43	1.93	0.77	0.57	0.49	0.99	1.47	0.7	1.51	1.16	0.32	0.96	0.75	0.49	1.41	0.69	6.41	6.04	6.77	5.22	6.47	2.44	9.95	6.38	7.29	8.2	7.13	8.04	5.53	4.83	3.16	3.54	3.12	4.68	8.39	6.88	8.17	9.56	8.98	8.21
gene-KI387_025877	GARP-G2-like	14.24	75.16	21.22	27.85	1.42	0.05	0	0.71	0.63	1.14	1.39	10.42	0	0.66	3.2	10.57	3.57	4.46	5.14	0.86	0.79	0.95	2.56	2	2.1	29.26	39.22	33.35	7.92	11.46	9.07	8.37	10.96	10.99	31.73	21.97	35.98	11.92	13.28	13.94	2.76	1.44	1.28	18.95	17.89	16.79
gene-KI387_025963	LOB	0	0	0	0	0	0	0	0	0	0	0	0	0	0	0	0	0	0	0	0	0	0	0	0	0	0	0	0	0	0	0	0	0	0	0	0	0	0	0	0	0	0	0	0	0	0
gene-KI387_026378	NAC	0.07	0.06	0.33	0.34	0.9	12.77	25.38	24.58	25.28	14.78	8.92	24.35	12.45	18.44	44.54	22.25	20.14	24.36	24.69	16.44	15.74	11.49	4.6	2.48	3.36	0.52	0.85	1.03	3.96	4.07	3.33	1.79	2.41	2.79	0.79	0.72	0.39	4.08	1.87	2.55	0.96	1.33	1.01	0.27	0.48	0.52
gene-KI387_026398	B3	0	0.16	0	0.14	1.22	3.14	4.81	9.35	9.89	9.36	3.6	13.56	2.72	4.46	9.2	10.92	5.57	6.55	4.31	4.66	4.34	1.09	3.45	1.93	3.21	0.59	1.24	0.21	6.5	5.05	4.22	1.65	0.46	2.32	0	0	0.63	4.24	2.01	5.78	0.23	0	0.44	0	0	0
gene-KI387_026468	WRKY	13.39	11.45	8.2	27.43	12.77	23.46	68.46	39.58	105.3	54.45	140.25	49.97	30.98	42.13	56.16	43.25	13.78	13.94	13.59	17.04	19.34	16.66	147.07	146.82	146.42	32.44	23.79	19.5	100.76	80.35	89.32	55.31	60.59	57.15	34.41	44.21	37.99	20.03	17.07	16.39	198.98	250.6	240.14	117.21	106.16	117.72
gene-KI387_026471	Trihelix	2.67	4.6	3.64	2	3.85	1.93	5.06	8.8	9.95	11.71	9.14	17.13	5.1	9.71	12.99	16.68	6.63	8.5	6.52	5.9	6.2	8.19	9.31	4.19	6.03	4.92	11.45	5.64	10.34	12.16	10.93	12.29	10.56	8.89	7.74	6.79	7.45	11.45	8.04	9.4	5.92	11.17	8.79	6.84	7.59	8.62
gene-KI387_026490	GARP-G2-like	1.38	4.87	1.12	1.18	0	0	0	0	0	0	0	0	0	0	0	0	0	0	0	0	0	0	0	0	0	2.54	2.06	3.32	24.45	24.12	37.46	0	0	0	8.86	8.12	2.13	13.36	9.19	17.91	0	0	0	0	0	0
gene-KI387_026534	MYB-related	0	0	0	0	0	0	0	0	0	0	0	0	0	0	0	0	0.95	2.05	2.49	0	0	0	3.36	0	0	0	0	0	0	0	0	0	0	0	0	0	0	0	0	0	0	0	0	0	0	0
gene-KI387_026607	B3-ARF	16.21	35.57	28.23	10.01	0.91	0	0.16	0.28	0.37	0.7	0.3	1.14	0.07	0.39	0.67	1.91	17.07	21.21	13.27	7.06	7.34	5.51	27.96	28.48	29.81	22.41	21.58	25.58	12.6	11.66	12.42	46.86	42.23	51.48	34.07	34.3	39.71	43.23	38.24	36.11	51.77	40.57	41.18	53.87	53.5	48.38
gene-KI387_026782	C2H2	29.53	17.26	14.87	27.08	20.3	49.11	87.75	88.87	105.85	83.19	58.38	83.8	69.57	71.58	78.61	79.41	28.37	29.67	31.58	34.41	30.17	24.7	55.49	47.15	51.54	37.96	30.39	33.51	23.1	23.98	19.27	48.66	43.32	47.9	28.99	25.45	22.25	25.95	27.01	25.03	80.66	75.21	71.07	53.89	52.14	49.99
gene-KI387_026828	C2H2	18.38	25.66	23.5	15.57	21.04	17.01	27.16	23.73	23.32	25.2	23.96	30.57	30.41	29.77	36.56	31.74	48.92	51.31	47.6	34.43	36.55	34.46	17.69	16.64	14.61	72.21	69.65	72.29	37.8	37.45	37.01	23.25	23.46	23.13	63.16	62.24	71.75	45.88	44.71	51.87	15.84	10.94	12.04	22.8	20.01	18.66
gene-KI387_026835	HB-other	7.67	14.13	11.88	9.5	5.78	4.63	16.32	25.42	22.4	29.77	22.96	21.85	21.19	26.47	31.02	22.7	17.17	20.32	16.44	18.71	17.69	13.93	23.41	21.83	20.41	15.67	18.34	16.92	15.5	16.24	16.19	21.3	23.03	23.16	18.51	18.23	16.05	13.69	15.42	15.51	16.66	14.21	14.17	11.3	14.89	14.95
gene-KI387_026898	C3H	20.57	23.84	11.68	19.87	11.12	3.85	24.04	21.17	22.99	26.19	22.84	26.22	33.48	28.64	26.52	29.07	14.73	15.98	14.46	14.9	15.11	14.08	10.97	13.26	11.92	9.85	12.64	13.02	13.2	13.23	14.29	11.72	13.29	15.56	13.24	12.31	15.86	10.45	10.19	11.35	8.64	10.89	9.81	12.28	12.17	15.22
gene-KI387_026931	NAC	0.25	0	0	0	0.38	0.35	0.81	2.99	1.16	3.14	2.1	3.1	3.81	0.52	0.31	2.15	0.49	0.29	0.46	0	0	0.36	1.45	1.76	1.76	1	0.3	0.3	0	0	0.15	1.03	0.5	0.51	0	0	0.76	0	0	0.18	1.01	1.27	0.64	1.21	0.31	1.33
gene-KI387_026933	NAC	78.81	31.64	2.22	178.98	44.4	134.32	217.15	153.47	242.45	169.55	216.39	115.85	183.05	142.65	163.16	109.27	70.4	55.39	60.13	51.81	57.23	56.35	253.47	258.64	295.63	12.04	9.84	2.98	68.07	48.39	51.63	162.01	160.69	150.12	11.28	9.32	9.09	49.35	38.05	38.74	129.76	271.26	229.74	201.24	180.61	192.71
gene-KI387_026935	NAC	0	0.17	0	0	0	0	0	0	0	0.22	0.22	0	0.4	0	0	0	0	0	0	0	0	0	0.3	0.75	0	0.81	0	0.22	0.58	1.74	0.65	0	0.24	0.24	0.24	0.5	0.43	0.87	0	0.5	0	0	0.23	0	0	0
gene-KI387_026936	NAC	6.7	3.68	0.26	26.15	31.96	54.63	14.62	7.07	10.6	11.16	12.75	7.57	15.73	5.9	7.58	6.12	6.41	6.03	7.25	6.58	5.99	7.12	22.44	37.9	20.65	0.81	2.59	0	12.16	6.02	8.32	14.52	14.5	14.06	0.95	4.57	0.88	6.32	9.1	6.44	9.79	29.86	16.86	12.49	12.72	19.95
gene-KI387_027090	B3-ARF	3.33	3.55	2.53	2.12	7.26	6.14	13.4	7.5	17.16	10.94	15.19	15.82	7.03	6.55	23.97	13.99	38.21	37.49	45.43	51.32	42.16	31.73	11.85	12.51	10.62	6.26	6.64	8.73	14.66	14.66	17.63	16.65	18.42	16.89	10.41	8.2	8.08	18.79	21.37	24.99	6.45	13.61	10.92	17.99	18.02	16.67
gene-KI387_027296	MYB	0	0	0	0	0	0	0	0	0	0	0	0	0	0	0	0	0	0	0	0	0	0	0	1.33	0.99	0	0	0	0	0	1.99	0	0	0.44	0	0	0	0	0	0.45	0	0	0.81	0	0	0
gene-KI387_027302	MYB-related	0	0	0	0	0	0	0	0	0	0	0	0	0	0	0	0	0	0	0	0	0	0	5.43	0	0	0	0	0	0	0	0	0	0	0	0	0	0	4.06	0	0	0	0	0	0	0	0
gene-KI387_027310	MYB	0	0	0	0	0	0	0	0	0	0	0	0	0	0	0	0	0	0	0	0	0	0	0.43	0	0	0	0	0	0	0	0	0	0	0	0	0	0	0.41	0.33	0	0	0	0	0	0	0
gene-KI387_027317	MYB-related	0	0	0	0	0	0	0	0	0	0	0	0	0	0	0	0	0	0	0	0	0	0	0	0	0	0	0	0	0	0	0	0	0	0	0	0	0	0	0	0	0	0	0	0	0	0
gene-KI387_027397	GARP-G2-like	33.57	64.21	38.06	53.08	41.88	41.45	21.6	35.25	31.64	39.78	28.08	41.33	41.74	38.06	41.71	37.07	26.06	28.59	25.1	23.17	26.03	18.08	59.69	60.64	62.1	45.08	63.55	54.64	67.67	68.28	59.57	85.26	82.95	81.5	56.2	49.54	43.49	64.37	65.24	60.45	52.89	62.68	61.46	98.85	90.88	87.29
gene-KI387_027400	GARP-G2-like	5.82	10.05	9.53	8.18	4.42	4.13	3.96	5.3	8.55	9.01	8.26	7.62	3.85	4.07	13.01	7.96	18.03	18.36	14.22	13.29	11.56	8.48	19.88	10.8	15.3	7.77	12.85	12.12	45.2	39.38	38.53	22.42	23.63	17.93	27.7	25.26	19.05	48.44	42.77	44.17	8.89	6.59	8.7	11.93	13.39	11.59
gene-KI387_027436	bHLH	0.43	1.46	1.24	0.56	0	0	0	0	0	0	0	0	0	0	0	0	0	0	0	0	0	0	1.85	2.48	2.31	1.2	1.5	1.03	0.58	0.6	0.43	1.74	1.49	2.16	1.8	0.88	1.18	0.12	0	0.2	4.44	6.68	5.26	2.51	2.15	2.24
gene-KI387_027565	MYB-related	4.12	6.41	5.02	2.53	7.6	3.92	7.12	8.6	10.37	10.11	9.61	11.95	8.31	10.22	14.92	11.28	15.86	16.78	15.01	14.5	13.21	12.04	23.47	20.19	22.16	13.49	15.19	12.65	14.45	14.06	13.28	37.96	43.71	38.44	18.67	22.1	17.11	28.78	22.81	22.29	30.28	35.96	31.76	43.15	40.69	39.62
gene-KI387_027583	WRKY	84.84	37.99	82.41	61.45	4.41	6.79	287.55	242.5	486.13	219.88	300.77	63.07	284.98	109.14	48.92	78.46	0	0	0	0	0	0	80.3	85.64	52.88	28.18	39.39	35.8	23.52	21.26	21.21	51.28	44.57	38.36	59.83	122.57	40.97	23.37	26.13	34.09	44.97	52.52	41.66	17.12	28.6	22.96
gene-KI387_027593	LOB	0	0	0	0	0	0	0	0	0	0	0	0	0	0	0	0	0	0	0	0	0	0	0	0	0	0	0	0	0	0	0	0	0	0	0	0	0	0	0	0	0	0	0	0	0	0
gene-KI387_027640	AP2/ERF-ERF	0	0	0	0	0	0	0	0	0	0	0	0	0	0	0	0	0	0	0	0	0	0	0	0	0	0	0	0	0	0	0	0	0	0	0	0	0	0	0	0	0	0	0	0	0	0
gene-KI387_027710	LOB	0.56	0	0	0	0	0	0	0	0	0	0	0	0	0	0	0	0	0	0	0	0	0	0	0	0	0	0	0	0	0	0	0	0	0	0	0	0	0	0	0	0	0	0	0	0	0
gene-KI387_027778	AP2/ERF-RAV	3.63	16.02	2.37	0.14	0	0	0.5	0.47	0.93	0.84	2.72	3.44	0.25	0.33	1.6	3.4	2.1	2.84	3.86	3.06	3.15	3.11	3.46	3.76	3.66	6.45	7.1	7.27	5.84	7.32	6.89	5.55	4.7	7.24	18.3	29.56	19.76	3.06	6.09	7.1	10.3	13.13	13.1	6.54	5.35	4.6
gene-KI387_027781	AP2/ERF-RAV	109.01	6.97	3.88	1.21	13.85	37.44	13.06	17.3	25.5	30.45	101.77	29.21	20.76	23.57	18.91	26.57	6.79	8.09	7.01	21.47	25.15	32.68	34.3	25.46	30.57	82.95	71.16	87.01	15.36	18.14	18.46	12.43	15.7	17.33	108.44	132.89	83.93	30.29	25.98	25.54	68.26	57.25	56.22	6.15	7.69	10.26
gene-KI387_027789	AP2/ERF-ERF	170.78	111.71	79.51	165.53	32.9	38.12	70.01	29.71	46.42	21.61	60.02	39.03	62.72	55.63	75.8	36.94	35.56	40.1	30.56	22.66	27.22	21.22	80.84	71.06	86.74	141.7	141.47	144.16	163.54	181.49	156.94	102.32	107.81	116.31	182.92	160.9	142.93	163.27	150.96	173.99	104.77	99.6	100.52	171.65	147.61	167.9
gene-KI387_027949	WRKY	18.79	22	20.11	29.64	13.36	16.12	16.06	16.11	21.02	25.74	19.42	32.1	15.87	18.2	32.66	31.28	23.07	23.82	20.87	16.92	17.49	12.5	39.34	42.16	43.44	47.29	40.01	40.14	58.24	46.33	52.95	54.41	55.03	57.51	55.81	53.79	47.27	46.58	46.31	44.17	56.91	63.84	57.79	74.64	82.16	72.53
gene-KI387_028156	bHLH	0	0	0	0	0	0	0	0	0	0	0	0	0	0	0	0	0	0	0	0	0	0	0.89	3.29	1.22	0	0	0	0	0	0	0.36	0	0	0	0	0	0	0	0	0	1.3	0.67	0.74	0	0.35
gene-KI387_028177	AP2/ERF-ERF	0	0	0	0	0	0	0	0	0	0	0	0	0	0	0	0	0	0.22	0.27	0	0	0	0	0	0.49	0.37	0	0	0	0	0	0	0	0	0	0	0	1.04	0	0	1.27	2.09	1.61	0	0	0
gene-KI387_028185	NAC	0.06	0	0	0.11	0.42	1.32	0.22	1.98	0.76	2.21	0.98	3.26	0.19	1.85	2.65	4.85	5.84	4.7	5.63	6.19	4.91	3.5	6.87	6.08	5.51	0	0.43	0.15	1.8	2.68	1.77	10.09	9.06	7.95	0.33	0.17	0.65	1	0.87	0.59	4.4	5.05	5.48	7.56	7.13	7.55
gene-KI387_028198	bHLH	0	0.14	0	0.76	0	0	0.2	0.23	0	0	0.91	0.27	0.17	0	1.12	0.48	0.29	0.11	0.27	0.75	0.81	0.53	0	0	0	0	0	0.18	0	0	0	0	0	0	0	0	0	0	0	0	0	0	0	0.21	0.18	0
gene-KI387_028201	bHLH	0	0	0	0	0	0.08	0	0	0	0	0	0	0	0	0	0	0	0	0	0	0	0.07	0	0	0	0	0	0	0	0	0	0	0	0	0	0	0	0	0	0	0	0	0	1.14	0	0
gene-KI387_028202	bHLH	0	0	0	0	0	0	0	0	0	0	0	0	0	0	0	0	0.29	0	0.56	0	0	0	0	0	0	0	0	0	0	0	0	0	0	0	0	0	0	0	0	0	0	0	0	0	0	0
gene-KI387_028203	bHLH	0	0	0	0	0	0	0	0	0	0	0	0	0	0	0	0	0	0	0	0	0	0	0	0	0	0	0	0	0	0	0	0	0	0	0	0	0	0	0	0	0	0	0	0	0.52	0.47
gene-KI387_028235	MYB-related	0	0	0	0	0	0	0	0	0	0	0	0	0	0	0	0	0	0	0	0	0	0	0	0	0	0	0	0	0	3.02	0	0	0	0	0	0	0	0	1.06	0	0	0	0	0	0	0
gene-KI387_028446	GRAS	7.36	21.81	10.87	1.58	2.64	0	1.02	2.07	0.52	1.5	3.9	1.75	2.59	3.03	7.66	2.47	18.43	18.31	14.51	9.53	11.22	9.67	9.41	9.25	8.96	22.91	31.55	28.37	20.87	24.01	25.07	41.35	40.69	40.06	44.41	46.44	34.29	36.31	40.51	46.7	13.44	8.08	8.09	32.17	31.79	30.61
gene-KI387_028510	GARP-G2-like	0	0	0	0	0	0	0	0	0	0	0	0	0	0	0	0	0	0	0	0	0	0	0	0	0	0	0	0	0	0	0	0	0	0	0	0	0	0	0	0	0	0	0	0	0	0
gene-KI387_028528	C3H	23.89	12.14	16.69	25.11	10.58	24.13	16.82	14.7	11.03	15.08	11.08	11.2	14.39	15	10.95	10.7	6.82	7.07	5.54	6.9	6.73	5.71	14.87	16.76	15.12	21.67	22.8	22.85	16.35	15.99	14.06	16.33	16.71	17.37	28.98	28.62	25.72	24.95	25.45	29.39	24.5	29.88	24.75	29.83	28.44	30.46
gene-KI387_028552	SBP	13.57	17.28	14.78	10.4	8.98	11.31	15.37	18.35	13.7	12.73	5.42	14.04	14.68	16.37	16.54	11.44	13.71	13.98	14.29	11.59	10.07	9.23	13.83	14.61	17.24	20.25	24.04	24.56	18.98	20.04	17.84	16.07	15.68	16.45	32.8	33.98	34.11	25.95	27.87	38.77	21.6	21.8	20.55	15.06	14.43	14.08
gene-KI387_028558	AP2/ERF-ERF	0	0.96	0	0	0.75	1.02	1.15	3.15	2.36	5.71	5.25	15.92	2.28	8.73	3.74	12.33	7.73	7.23	2.51	17.3	16.22	21.54	4.53	5.93	2.89	0.61	2.26	1.94	16.23	16.63	16.16	1.47	2.17	1.09	4.67	3.04	1.65	1.31	6.91	4.49	24.48	18.49	16.24	16.86	19.84	19.01
gene-KI387_028569	GARP-G2-like	27.03	48.01	53.78	34.57	27.42	23.41	18.15	20.35	22.04	23.6	19.15	28.29	26.45	19.7	29.48	29.84	21.12	22.49	22.77	23.14	24.95	19.92	21.27	21.13	23.57	50.85	56.84	55.62	27.51	23.42	24.24	35.7	42.7	36.54	62.18	70.28	72.32	26.53	27.13	31.42	38.05	36.05	36.95	53.83	53.65	56.18
gene-KI387_028609	HB-KNOX	144.27	185.1	131.71	150.74	32.01	4.4	11	26.69	11.36	19.61	7.61	20.86	4.67	23.79	10.88	21.34	19.48	30.21	29.15	40.65	37.82	38.55	86.58	93.75	86.28	208.23	234.36	217.61	116.43	114.02	112.01	155.79	159.21	177.57	243.68	227.49	164.38	120.06	112.22	117.83	105.99	112.53	103.68	235.53	230.61	226.16
gene-KI387_028696	SBP	0.1	1.11	0	0	0.58	0.47	0.83	0.69	0.86	1.21	3.33	3.42	0.1	2.06	2.24	2.45	23.59	34.47	28.28	10.12	9.03	7.43	5.31	3.33	5.17	0.43	0	0.12	66.57	68.84	73.84	4.16	3.64	3.55	0.51	0.4	0.57	119.75	119.89	140.85	7.62	6.72	5.84	8.59	8.71	9.02
gene-KI387_028721	NF-YA	2.92	10.64	4.95	10.86	2.7	4.49	3.52	6.98	6.05	7.79	6.31	6.87	4.34	5.01	9.81	8.35	8.07	9.24	7.75	5.6	5.41	5.31	13.46	10.21	12.72	11.23	20.84	14.74	54.07	51.97	51.6	13.11	13.19	19.73	17.02	17.48	13.51	27.02	23.01	20.54	17.46	22.16	19.04	18.88	20.98	22.1
gene-KI387_028806	C2C2-GATA	47.46	73.9	51.1	58.23	36.81	43.95	49.95	62.77	55.98	59.92	58.15	61.06	50.12	53.13	69.34	59.09	39	45.95	42.72	37.55	30.57	26.53	62.23	69.18	66.26	68.8	72.96	79.79	64.13	57.48	57.42	74.61	75.05	76.12	76.95	80.97	70.33	84.01	77.45	76.58	67.42	89.63	80.5	112.36	111.56	103.41
gene-KI387_028815	MYB-related	1.34	3.43	2.37	0.57	0	0	0	0	0.34	0.61	0	0.45	0	0	0	0	0.86	0.85	1.02	0	0	0	0.79	1.96	1.09	32.46	51.81	51.75	44.69	67.02	48.55	0	0.95	0.96	56.8	43.9	67.63	62.2	70.43	73.92	1.56	1.17	1.19	0.98	1.74	1.24
gene-KI387_028819	MADS-MIKC	0	0	0	0	0	0.18	0.86	0	0.88	0.4	0	0	1.46	0.46	0.84	1.6	6	5.15	0	0	0	0	4.98	5.26	4.97	0	0	0	0	0	0	1.2	0.8	0.8	0	0	0	0	0	0	18.62	24.97	28.47	2.88	1.09	2.31
gene-KI387_028824	MADS-MIKC	0	0	0	0	0	0	0	0	0.88	0.4	0	0.59	0	0	0	0	0	0	0	0	0	0	13.44	10.53	8.59	0	0	0	0	0	0	0	0	0.4	0	0	0	0	0	0	22.5	19.69	19.6	0	0	0
gene-KI387_028836	C2C2-CO-like	49.68	71.63	37.34	46.78	13.34	14.13	30.63	15.72	35.3	11.64	36.31	8.07	30.8	28.11	7.85	8.07	37.63	42.77	41.8	17.17	20.82	22.71	15.82	19.78	19.01	209.59	205.52	271.82	66.44	81.82	69.84	80.33	80.55	77.27	237.85	170.75	277.83	60.32	78.48	90.04	6.56	7.51	5.83	107.94	109.2	105.83
gene-KI387_028888	Tify	46.02	26.74	63.52	25.78	78.49	133.22	51.38	114.07	64.67	132.36	73.91	122.55	62.13	73.68	90.4	109.41	38.51	45.37	37.23	57.8	48.68	42.86	373.58	370.04	377.34	110.58	131.29	93.27	202.95	161.69	191.09	279.74	267.22	285.74	220.63	354.1	178.27	60.35	52.81	53.75	439.61	538.19	529.66	336.33	345	326.05
gene-KI387_028907	MYB	0	0	0	0	0	0	0	0	0.29	0	0	0.4	0	0.31	0.28	0	0	0	0	0	0	0	4.57	5.54	4.54	0.48	0	0	0.34	0	0	3.44	7.25	8.5	0	0	0.26	0	0.54	0.59	4.18	2.78	3.42	9.03	6.97	4.41
gene-KI387_028913	MYB	0	0.32	0	0	0	0	0	0	0	0	0	0	0	0	0	0	0	0.17	0	0	0	0	0.36	0.61	0.34	0	0	0	0	0.53	0	0	0.18	0.58	0.15	0.46	0.39	0	0.14	0.15	0	0.18	0.44	0	0.27	0.14
gene-KI387_028916	MYB-related	0	0	0	0	0	0	0	0	0	0	0	0	0	0	0	0	0	0	0	0	0	0	10.1	0	3.59	0	0	0	0	0	0	6.74	0	15.31	0	0	0	0	0	0	0	3.44	0	0	0	6.37
gene-KI387_028917	MYB-related	0	0	0	0	0	0	0	0	0	0	0	0	0	0	0	0	0	0	0	0	0	0	0	6.19	3.59	0	0	0	0	0	0	6.74	3.94	0	0	0	0	0	0	0	0	0	2.87	0	0	0
gene-KI387_028923	MYB-related	0	0.69	0	0.09	0	0	0	0	0	0.24	0.12	0	0	0	0	0.16	0	0	0	0	0	0	0	0	0	0.23	0.12	0.12	0	0	0.12	0	0	0	0.55	0.28	0.49	0	0	0	0.55	0	0	0.14	0	0
gene-KI387_028925	MYB-related	0	2.8	3.48	2.46	0	0	0	0	0	0	0	0	0	0	0	0	0	0	0	0	0	0	0	0	0	0	0	7.06	0	0	0	0	0	0	7.78	4.91	4.4	0	0	0	0	0	0	0	0	3.82
gene-KI387_028938	WRKY	76.84	61.24	59.54	54.9	225.47	230.36	181.73	249.11	251.02	315.63	232.23	370.35	194.18	189.6	127.89	379.87	146.14	149.01	143.59	116.92	109.33	101.52	294.21	295.67	292.8	174.31	185.25	184.82	125.84	121.31	145.52	315.46	307.49	304.71	286.42	355.62	249.16	105.47	102.86	120.39	481.3	441.39	447.42	349.77	368.36	362.03
gene-KI387_029049	C2H2	0	0	0	0	0	0	0	0	0	0	0	0	0	0	0	0	0	0	0	0	0	0	0	0	0	0	0	0	0	0	0	0	0	0	0	0	0	0	0	0	0	0	0	0	0	0
gene-KI387_029056	LOB	1.23	1.26	0.13	0.84	0	0	0.1	0.23	0	0	0	0.41	0.34	0.11	0	0.24	0.24	0.44	0.15	0.14	0	0	0.4	0	0	0.09	0.19	0.29	0.13	0.49	0	0.11	0	0	0.43	0.11	0	0.66	0.63	0.34	0	0.14	0.31	0.22	0.2	0.11
gene-KI387_029100	AP2/ERF-ERF	0	0	0	0	0	0	0	0	0	0	0	0	0	0	0	0	0	0	0	0	0	0	0	0	0	0	0	0	0	0	0	0	0	0	0	0	0	0	0	0	0	0	0	0	0	0
gene-KI387_029193	AP2/ERF-AP2	0.1	0.66	0.36	0.17	0.33	0.44	0	0.33	0.06	0.26	0	1.56	0	0.37	0.32	1.17	2.82	6.05	3.8	0	0.03	0.04	27.64	25.85	28.99	14.44	6.83	11.13	25.66	21.95	28.03	69.28	64.48	75.79	7.91	6.83	9.18	9.14	8.74	7.19	21.07	25.78	26.34	100.43	108	100.2
gene-KI387_029197	GRF	0.09	0.09	0	0	0	3.79	0	0.06	0	0.05	0	0	0	0.06	0.05	0.2	0.09	0.32	0.09	0.55	0.41	0.34	0.22	0.32	0.28	0.36	0.42	0.27	86.94	82.67	96.05	0	0	0	1.69	0.68	0.16	298.2	196.41	261.25	0.36	0.38	0.81	0	0	0
gene-KI387_029201	bHLH	2.15	21.11	14.12	3.6	0.36	0	0.29	0.4	0.29	1.27	0.97	0.94	0.19	0.62	0.91	0.9	0	0.11	0	0.12	0.17	0.11	2	2.46	2.36	35.12	39.23	43.04	10.53	10.22	10.95	1.62	2.36	2.45	73.28	68.24	56.93	7.7	8.71	11.03	5.83	7.05	5.65	2.64	4.15	2.81
gene-KI387_029218	AP2/ERF-ERF	0	0.16	0	0	0.1	0	0	0	0.68	0	4.06	0	0	0	0	0	0.16	0	0	0.27	0.88	2.69	11.07	15.13	13.93	1.52	3.38	1.41	3.81	1.01	2.44	1.14	0.44	1.79	9.16	13.06	13.09	0	0.22	0	61.11	28.84	31.15	29.66	31.86	25.85
gene-KI387_029221	AP2/ERF-ERF	0.35	9.65	0.14	0.44	2.08	4.29	2.37	1.38	9.53	3.3	29.76	1.96	0.8	1.28	5.9	4.92	1.18	1.85	0.95	4.49	4.38	3.96	403.43	395.65	402.77	98.67	84.53	23.67	330.02	310.51	320.34	17.29	19.96	18.74	113.78	165.49	115.38	17.46	9.43	5.7	501.51	359.48	354.53	109.48	113.61	119.96
gene-KI387_029228	AP2/ERF-ERF	0	0	0	0	0.11	2.39	0.22	0	0.43	0	1.21	0.88	0	0.12	0	0.13	0	0	0.4	1.63	1.11	0.39	36.55	41.59	40.06	1.67	1.51	0.63	2.1	1.3	0.94	0.47	0.46	0.43	2.14	3.14	4.97	0.14	0.56	0.12	41.87	27.05	28.56	2.86	2.43	2.01
gene-KI387_029238	AP2/ERF-ERF	0	0	0	0	0.04	0	0	0	0	0	0	0	0	0	0	0	0	0	0	0	0	0	0	0	0	0	0	0	0	0	0.08	0	0	0	0	0.09	0	0	0	0	0	0	0.08	0	0	0
gene-KI387_029275	AP2/ERF-ERF	0	0	0	0	0	0	0	0	0	0	0	0	0	0	0	0	0.42	0.22	0.66	2.17	2.83	2.69	1.45	1.63	0.68	0.17	0	0	0.72	3.55	1.96	0.4	0.19	0.39	0	0	0	9.54	10.37	8.32	0.39	1.22	0	0	0	0.19
gene-KI387_029459	MYB	0	0	0	0	0	0	0	0	0.12	0	0	0	0.4	0	0.11	0	0	0	0	0	0	0	0	0	0	0	0	0	0	0	0	0	0	0	0	0	0	0	0	0	0	0	0	0	0	0
gene-KI387_029460	B3-ARF	3.92	2.76	4.9	3.34	2.05	2.16	0.46	0.44	0.55	0.39	0.43	0.67	0.29	0.98	0.6	0.96	2.92	4.05	4.06	1.45	1.08	0.65	4.38	4.78	5.58	5.9	5.11	7.22	14.05	14.65	14.8	13.31	13.36	14.16	11.83	9.73	8.45	12.56	11.92	9.1	9.43	10.06	11.09	22.35	23.79	20.35
gene-KI387_029546	AP2/ERF-ERF	0.13	3.14	0	0.23	1.36	9.34	0.35	0.61	0.36	0.65	0.98	1.2	1.33	0.95	0.17	0.21	0.26	0.31	0.37	0.71	0.65	0.39	35.3	38.64	35.34	37.66	27.8	8.54	210.49	215.13	223.52	7.39	5.05	4.19	89.76	191.28	84.16	2.67	6.65	2.46	72.2	42.28	53.52	28.77	26.45	29.8
gene-KI387_029593	bHLH	37.01	30.25	31.1	28.01	20.15	132.02	12.69	17.05	19.96	26.31	23.22	20.22	20.14	13.7	21.51	16.54	12.12	14.46	11.82	7.93	11.59	8.92	52.99	60.36	57.61	56.57	45.32	41.07	41.12	30.18	31.7	60.64	59.18	70.35	63.13	79.4	43.46	36.4	35.9	32.86	106.13	73.71	70.54	67.69	74.39	73.15
gene-KI387_029660	Tify	1.92	7.2	3.65	2.08	2.46	3.17	5.18	6.29	8.16	5.49	4.93	8.29	2.34	4.49	10.82	11.45	8.91	10.52	7.42	4.01	4.27	3.58	9.24	9.42	8.58	2.62	2.38	2.55	5.25	7.1	4.76	6.86	9.68	5.9	2.43	2.93	2.52	8.56	6.24	3.91	9.51	17.38	16.44	10.86	9.44	10.97
gene-KI387_029766	MYB	6.65	18.59	8.5	7.54	4.11	7.95	5.47	6.66	11.29	6.51	11.97	11.79	4.76	6.02	7.33	3.61	7.79	11.62	8.49	7.65	8.8	11.04	13.94	19.7	11.66	14.52	25.57	22.69	14.92	15.26	19.52	5.75	13.99	18.86	25.23	16.74	15.59	16.84	22.32	24.77	19.08	13.07	11.14	14.41	15.93	18.28
gene-KI387_029808	C3H	3.8	3.8	2.86	2.39	1.75	0.76	5.64	6.74	7.23	5.74	6.58	5.01	5.63	4.87	6.7	5.33	1.9	1.72	1.49	1.57	1.53	1.29	1.99	3.1	2.25	2.25	2.88	3.04	2.49	3.99	2.59	2.71	2.71	4.76	2.76	3.16	3.63	3.12	3.35	4.33	1.02	2.7	2.15	0.94	1.86	1.1
gene-KI387_029819	GARP-ARR-B	24.81	29.3	26.24	19.56	24.83	17.64	19.23	26.03	22.58	31.08	16.96	37.21	14.03	27.06	35.19	35.59	47.11	47.92	50.96	44.65	42.88	31.07	43.7	45.49	44.08	68.78	57.15	66.37	52.92	47.61	48.22	62.07	61.84	66.58	53.21	57.66	72.91	59.52	61.05	68.5	122.7	92.61	81.33	82.15	78.13	74.55
gene-KI387_029852	B3	0	0	0	0	0	0	0	0	0	0	0	0	0	0	0	0	0	0	0	0	0	0	0	0	0	0	0	0	0	0	0	0	0	0	0	0	0	0	0	0	0	0	0	0	0	0
gene-KI387_029943	MYB-related	17.32	12.77	11.26	11.49	13.59	11.02	30.59	32.09	22.42	22.16	11.7	25.61	30.67	29.53	29.37	24.79	14.63	14.72	12.58	14.51	11.78	12.56	27.78	26.54	27.57	26.24	28.27	29.91	23.8	21.18	20.32	26.41	26.36	30.15	32.61	35.39	26.24	19.35	21.86	23.59	21.39	26.06	24.13	23.25	26.16	22.27
gene-KI387_029954	bZIP	43.15	25.07	17.74	31.98	28.69	97.29	67.13	60.71	51.04	56.24	54.91	54.22	74.58	64.54	62.34	58.84	25.02	28.6	23.08	27.97	28.05	25.47	51.36	42.42	48.32	41.62	38.11	43.36	36.69	35.29	36.06	44.19	45.01	42.92	36.8	36.47	29.49	31.64	33.05	33.78	43.2	44.26	43.69	51.08	46.84	44.98
gene-KI387_029957	MYB-related	3.15	4.79	4.5	2.05	4.4	1.99	6.09	8.85	8.47	9.51	2.88	9.54	4.18	7.85	11.66	10.4	12.13	13.62	12.1	9.81	8	5.45	13.14	12.6	11.38	13.18	16.1	17.92	11.55	12.36	12.51	10.41	11.79	10.29	16.57	14.77	14.47	12.5	15.76	18.16	11.83	15.78	12.69	9.46	8.53	8.01
gene-KI387_030049	GARP-G2-like	0	0.84	0.48	0	0.35	0	0	0	0	0	0.43	0	0	0.52	0	0.59	0.56	0.88	0.53	0	0	0	0	1.32	0	0	0.39	3.08	2.61	0.78	1.18	0	0	1.31	0	0.91	0.39	1.04	2.87	2.23	0.42	0.52	0	0	0	0
gene-KI387_030090	B3	0.86	2.58	0.94	1.48	1.28	3.21	3.92	3.03	3.53	4.51	5.09	3.9	6.71	4.87	4.69	3.88	3.09	2.35	3.43	1.94	2.22	1.59	1.71	1.46	2.36	0.75	1.35	0.69	1.55	1.73	2.31	1.04	1.5	1.65	0.38	0.66	0.91	2.18	1.11	1.05	0.51	1.76	1.09	0.91	1.97	1.62
gene-KI387_030093	STAT	1.96	3.67	3.1	1.62	1.63	1.3	4.91	5.46	5.49	5.16	3.01	6.09	2.03	3.56	5.57	5.41	3.76	4.32	3.3	3.23	3.03	2.92	3.81	3.08	2.95	2.61	3.02	4.99	4.01	5.21	4.76	3.55	2.72	4.63	4.09	4.4	3.52	3.97	3.8	4.12	3.23	3.27	2.63	1.72	2.85	2.59
gene-KI387_030229	Trihelix	3.49	2.43	2.76	1.96	1.9	2.68	1.85	3.03	2.21	1.71	1.57	2.11	2.47	1.83	2.18	2.24	5.29	5.24	6.73	5.47	5.16	5.12	2.58	2.53	3.56	2.06	4.01	3.79	5.72	3.82	5.87	3.63	3.51	7.42	4.37	4.53	4.78	9.09	10.45	10.4	3.38	5.66	3.7	3.97	7.08	5.08
gene-KI387_030260	C3H	13.19	19.84	12.06	8.65	7.65	9.53	15.1	17.33	16.07	13.31	19.63	21.74	10.89	20.69	25.7	25.3	16.55	18.12	22.37	13.92	13.25	13.14	15.98	24.99	20.27	14.86	18.44	18.55	26.03	25.95	28.75	24.67	25.85	24.76	16.01	11.7	15.4	39.99	40.59	36.57	28.19	16.38	25.54	53.19	38.8	47.67
gene-KI387_030434	GARP-G2-like	0	3.36	2.1	0.7	0.07	0	0	0.52	0	0.27	0.14	0.2	0	0	1.12	0	0.11	0.36	0	0.1	0.24	0.17	1.34	2.28	2.17	0.66	0.69	2.11	2.48	1.42	1.98	6.53	4.16	3.89	2.5	2.27	2.1	0.57	0.45	1.46	0.62	0.2	0.3	1.6	0.85	0.92
gene-KI387_030585	C2C2-YABBY	0	0	0	0	0	0	0	0	0	0	0	0	0	0	0	0	0	0	0	0	0	0	0	0	0	0	0	0	7.57	5.59	3.33	0	0	0	0	0	0	0	0	0	0	0	0	0	0	0
gene-KI387_030611	AP2/ERF-AP2	9.28	28.02	7.14	6.02	0	0	3.23	1.59	3.17	2.29	2.51	3.48	2.55	2.74	3.15	2.15	3.31	0.89	0.27	0.05	0.16	0.08	14.83	12.06	13.71	25.95	22.25	36.15	3.32	2.55	3.76	4.71	4.74	5.18	13.64	18.87	16.91	2.69	1.61	1.25	2.49	10.6	8.84	6.54	6.6	5.28
gene-KI387_030726	bHLH	0	0	0	0	0.47	0	0	0	0	0	0.37	0	0	0	0	0	0.82	1.07	0.48	0	0.18	0	14.9	12.32	9.94	0	0.34	0	0	0	0	0	0	0	0.33	0.23	0.69	0.47	0	0.79	37.92	20.1	22.2	0	0	0
gene-KI387_030737	B3	0	0	0	0	0	0	0	0	0	0.37	0	0	0	0	0	0	0	0	0	0	0	0	0	0	0	0	0	0	0	0	0	0	0	0	0	0	0	0	0	0	0	0	0	0	0	0
gene-KI387_030750	MYB	2.19	34.45	21.42	14.24	0.47	0	0.17	0	0.17	0	0.31	0	0	0	0	0	0.88	0	0.24	0.22	0.35	0.46	1.93	1.27	2.01	2.8	3.39	1.73	28	41.39	31.75	4.97	6.54	4.51	7.83	4.34	3.27	5.1	7.71	5.05	1.9	3.47	1.82	26.38	20.63	28.85
gene-KI387_030752	MYB	0.57	8.32	0.93	3.04	0.51	0	0.37	0	1.34	0.86	1.38	1.54	0.16	0	1.77	2.72	3.46	6.5	7.01	0.24	0.48	0.82	1.66	2.01	2.23	0.49	0.34	0.52	2.11	6.65	4.73	3.14	3.82	1.54	2.51	4.01	1.38	5.17	3.53	4.8	2.1	1.44	1.47	2.97	1.23	1.7
gene-KI387_030753	MYB	3	29.14	0.64	15.02	0.61	2.47	3.23	0.16	4.17	0	10.04	2.5	0.24	0.3	2.38	1.19	0	0.17	0	0.47	0.38	0.48	1.28	2.01	2.06	4.03	3.94	6.16	0.54	1.21	0.54	28.02	26.66	23.68	1.63	1.54	0.93	0.73	0.86	0.92	2.22	1.3	0.57	17.62	18.14	16.62
gene-KI387_030756	MYB	0	0	0	0	0	0	0	0	0	0	0	0	0	0	0	0	0	0	0	0	0	0	2.29	1.7	3.18	0	0	0	2.13	3.29	1.81	1.78	2.33	1.61	0	0	0	1.07	0.72	0	1.74	0.94	0.71	1.15	0.11	0.49
gene-KI387_030758	MYB-related	0	1.38	0	0	0	0	0	0	0	0	0	0	0	0	0	0	0	0	0	0	0	0	0	0	0	0	0	0	0	6.98	0	0	0	0	0	0	0	0	0	0	0	0	0	0	0	0
gene-KI387_030764	MYB-related	5.25	1.25	0	2.2	0	0	0	0	0	0	0	0	0	0	0	8.87	0	1.01	0	0	0	0	0	0	0	0	0	0	8.13	2.97	13.26	0	0	0	0	0	0	11.41	12.32	17.86	0	0	0	0	3.25	0
gene-KI387_030767	MYB-related	6.56	13.74	13.49	29.67	27.46	0	12.94	0	6.48	0	0	19.46	11.63	7.11	21.48	17.75	23.19	22.14	29.35	28.82	30.63	20.2	0	0	0	0	0	2.94	24.4	17.84	36.48	0	0	0	6.5	0	3.62	11.41	9.24	7.14	0	0	0	0	0	0
gene-KI387_030768	MYB-related	131.26	69.94	47.73	159.36	0.72	0	12.94	0	6.48	6.3	0	0	0	0	7.16	0	0	0	0	0	0	0	0	0	0	2.92	0	0	0	0	0	0	0	0	0	0	0	0	0	0	0	0	0	0	0	0
gene-KI387_030771	MYB-related	1.31	2.5	3.11	1.1	6.5	0	0	0	0	0	0	9.73	0	0	7.16	8.87	2.44	5.03	4.89	12.81	10.5	7.9	0	0	0	0	0	0	0	0	0	0	0	0	0	0	0	0	0	0	0	0	0	0	0	0
gene-KI387_030772	MYB	12.47	10.78	0.25	11.18	3.49	0	1.05	3.1	4.31	3.43	6.16	4.38	0	2.28	10.95	7.22	5.08	1.42	1.7	0	0	0.44	0	0	0	1.57	2.93	7.89	47.35	69.46	69.01	0	0	0	59.94	40.94	7.28	26.28	15.94	16.39	0	0	0.43	0	0	0
gene-KI387_030774	MYB-related	1.31	28.72	4.15	1.1	2.89	0	6.47	0	19.44	18.91	10.9	9.73	5.81	0	28.64	8.87	0	0	2.45	16.01	19.25	7.9	0	0	0	0	0	0	0	0	0	0	0	0	6.5	0	0	0	0	0	0	0	0	0	0	0
gene-KI387_030775	MYB-related	31.5	43.71	31.13	14.29	2.89	0	0	0	0	0	21.79	0	0	0	7.16	0	35.4	33.21	31.79	12.81	20.13	17.56	0	6.19	7.19	5.84	20.05	47	0	5.95	0	0	11.82	0	136.42	129.49	54.27	0	3.08	10.72	0	0	2.87	0	0	6.37
gene-KI387_030778	MYB	0	0	0	0	0	0	0	0	0	0	0	0	0	0	0	0	0	0	0	0	0	0	0	0	0	0	0	0	0	0	0	0	0	0	0	0	0	1.54	2.02	1.52	0	0	0	0	0	0
gene-KI387_030780	WRKY	9.49	32.38	13.36	12.51	5.02	5.23	11.07	6.68	14.11	9.93	14.74	16.57	7.47	8.77	23.75	15.59	19.59	19.93	20.88	19.34	17.28	15.57	10.4	11.18	9.08	28.53	31.02	28.1	26.14	25.06	23.65	21.67	19.1	21.88	31.34	24.4	33.09	30.26	29.81	33.51	12.24	9.41	14.21	16.55	21.83	15.99
gene-KI387_030918	WRKY	6.04	1.66	1.69	3.4	11.55	0	13.24	17.91	14.81	16.24	18.78	15.62	26.41	3.84	0	15.88	1.01	0.13	0.47	0.58	1.05	0.74	26.01	26.21	20.35	6.67	13.16	10.95	0.87	3.03	1.74	17.25	19.91	19.84	15.01	26.15	6.02	3.77	6.42	8.41	18.18	22.74	17.16	11.29	8.94	9.81
gene-KI387_030919	WRKY	4.17	0.18	0.39	0.81	13.92	4.96	9.75	30.18	37.58	107.8	39.69	118.89	6.44	4.56	0	130.82	0.19	0	0.7	0.08	0	0.07	12.78	14.46	18.08	7.67	10	8.63	3.99	1.6	2.17	9.88	8.17	10.26	10.45	9.5	9.87	2	1.7	1.17	19.29	26.83	20.3	12.33	15.7	14.58
gene-KI387_030920	WRKY	7.97	4.03	3.27	2.98	3.92	4.2	78.12	37.46	191.35	117.28	398.53	241.17	21.35	4.14	6.5	243.7	14.61	9.16	9.75	1.9	2.02	2.14	35.23	31.73	38.82	53.78	74.2	52.97	18.78	20.3	17.79	35.01	40.53	38.79	97.34	101.46	79.79	36.3	25.77	32.33	39.45	43.7	37.03	25.46	26.31	21.94
gene-KI387_030922	WRKY	1.39	1	0	0.4	9.38	19.2	36.75	35.43	63.91	81.88	137.15	84.95	34.89	38.72	109.14	91.39	63.27	55.56	66.06	46.33	38.69	32.76	19.7	18.51	16.58	1.85	0.96	2.11	0	0.85	0.57	62.22	62.99	60.99	4.05	0.97	3.2	0.95	2.55	2.1	23.84	32.9	29.51	36.63	35.34	33.77
gene-KI387_030990	C3H	8.92	11.94	12.57	14.28	10.55	12.07	21.16	20.07	20.14	19.7	15.67	27.04	19.16	19.87	28.32	27.38	14.12	15.15	14.84	13.51	11.37	8.97	15.63	15.36	14.32	12.97	15.9	17.35	20.81	19.2	20.29	19.17	22.24	20.37	21.89	20.83	22.93	15.62	17.69	17.92	9.5	12.94	12.44	11.7	10.39	9.69
gene-KI387_031101	RWP-RK	13.83	35.01	16.98	19.95	5.78	6.04	9.36	8.61	7.36	7.5	6.67	11.74	13.62	8.5	16.51	11.07	12.33	13.55	12.5	9.65	9.43	8.07	23.59	25.11	23.45	35.02	39.56	32.56	30.07	24.22	24.32	30.69	29.9	32.42	37.05	33.81	31.05	23.53	22.86	27.46	60.83	44.73	42.47	35.38	37.42	34.94
gene-KI387_031112	Trihelix	60.63	40.67	45.08	54.7	53.29	102.82	41.99	67.37	57.82	82.12	66.42	75.23	44.19	73.56	78.59	78.58	99.32	104.55	110.62	90.61	91	81.05	155.91	156.69	169.69	140.43	120.69	124.01	159.47	132.85	142.48	192.61	185.29	194.47	112.51	120.14	142.15	194.93	177.79	184.69	246.23	201.55	201.81	242.09	225.64	234.63
gene-KI387_031295	MYB	1.04	3.09	0.43	1.04	2.07	2.67	0.43	1.11	0.22	1.97	0.2	2.48	0	0.69	0.1	2.06	1.02	0.6	1.2	1.32	1.01	1.45	12.65	11.54	10.93	4.58	5.17	4.25	17.38	25.91	22.8	19.93	20.23	16.68	6.1	18.3	1.64	7.03	4.33	4.17	17.29	21.08	18.44	70.78	72.18	78.92
gene-KI387_031318	Tify	94.08	219.95	110.81	208.21	95.39	46.69	179.74	97.71	335.8	100.09	237.8	110.94	133.06	88.92	170.87	109.67	95.63	115.29	91.13	77.3	73.07	61.28	298.78	288.57	284.36	101.69	156.47	128.24	237.35	210.28	210.94	180.95	178.9	167.65	234.29	236.44	160.01	234.99	297.31	292.45	218.42	264.36	261.94	245.77	248.55	242.67
gene-KI387_031391	RWP-RK	0.1	0.29	0	0	0	0	0	0	0	0.12	0	0	0.11	0	0	0	0	0	0	0	0	0	0	0	0	0	0.12	0	0	0	0	0	0	0.13	0	0	0	0	0	0	0	0	0	0	0	0
gene-KI387_031421	HB-HD-ZIP	15.88	227.91	36.44	86.04	3.59	0	1.4	3.31	6.25	1.75	12.32	13.01	0	10.16	35.13	18.07	33.25	33.68	34.67	136.67	107.52	125.51	0.54	1.3	3.88	16.9	12.22	5.7	21.65	14.55	15.94	22.4	22.69	33.52	27.84	30.56	8.97	7.68	7.29	5.29	1.66	1.54	2.38	45.6	41.7	47.53
gene-KI387_031493	HB-HD-ZIP	3.32	3.72	3.45	1.32	2.48	0.73	1.45	5.52	5.1	7.55	6.83	11.41	2.48	6.35	18.81	10.92	11.21	14.01	11.35	10.68	8.9	6.93	27.09	27.16	26.5	38.77	30.91	31.04	62.78	56.5	60.75	15.85	15.25	16.61	42.82	43.68	32.17	37.18	32.87	31.72	25.89	29.92	26.4	26.78	28.47	26.55
gene-KI387_031513	MYB-related	11.21	13.32	9.1	12.62	6.15	9.11	13.6	17.05	23.78	19.15	20	22.24	13.47	15.43	24.09	25.04	18.81	14.8	15.83	13.81	14.22	11.6	33.57	27.32	31.33	15.57	23.81	18.97	22.96	24.98	23.74	32.39	38.72	37.51	20.16	16.01	21.69	32.16	23.83	24.39	30.28	38.28	45.97	45.25	39.94	44.32
gene-KI387_031598	NAC	15.24	18.73	9.89	11.97	10.05	20.19	29.49	25.5	22.71	19.74	22.99	24.03	26.36	25.73	31.92	25.16	21.09	22.3	23.72	17.53	15.88	18.06	30.6	32.85	36.02	23.53	27.54	29.85	28.59	31.04	24.27	36.83	43.33	44.79	33.76	29.39	26.73	31.2	26.72	37.5	23.25	25.39	30.41	52.63	51.49	44.71
gene-KI387_031663	GeBP	12.16	23.41	16.87	12.02	27.08	23.37	29.4	33.87	32.25	32.97	33.12	47.54	44.7	39.26	70.43	48.64	69.58	65.96	60.53	42.97	41.82	47.74	62.42	61.92	59.72	32.19	55.4	47.64	54.8	49.68	58.98	89.35	99.63	94.85	56.02	51.66	57.77	93.3	92.31	111.04	45.16	49.27	40.83	74.61	78.91	80.5
gene-KI387_031775	MYB	1.15	2.94	1.72	2.46	0.8	2.37	7.79	4.39	11.31	7.99	12.37	12.22	4.32	2.91	14.97	17.44	19.29	14.28	21.33	15.68	17.61	13.55	3.98	3.86	3.69	7.24	5.23	4.32	10.72	13.78	9.24	2.44	0.8	1.07	6.66	7.54	6.28	4.54	5.64	4.43	2.11	0.33	2.27	0.28	0.24	0
gene-KI387_031808	WRKY	24.06	13.8	16.97	24.43	15.09	18.67	37.55	33.91	30.57	40.64	16.5	29.44	33.88	22.25	22.01	28.54	11.26	10.85	9.24	11.76	11.41	10.75	38.67	42.47	38.59	26.23	33.86	29.04	18.08	15.76	17.8	24.68	26.93	29.49	31.2	35.06	26.39	26.05	24.44	20.12	38.01	51.61	49.61	31.25	35.86	32.35
gene-KI387_031846	Tify	0	0	0	0.33	0	0	2.15	0	1.48	0	1.28	0	1.23	0	2.19	0	0.36	0	0.35	0	0	0	5.33	13.14	5.36	0	0	0	19.35	15.94	13.08	20.96	27.21	19.36	1.76	0.63	0	20.54	21.33	17.82	3.45	3.51	8.73	5.62	3.82	5.16
gene-KI387_031856	Tify	49.25	20.38	0.59	66.59	0.41	0	149.38	16.95	217.21	6.63	81.2	0	151.74	2.54	17.7	0	0	0	0	0	0	0	428.22	365.27	446.89	1.19	10.61	2.46	27.02	22.38	10.62	1093.52	1001.81	1046.45	4.11	3.17	1.4	34.3	19.56	20.54	26.36	58.87	54.47	116.78	100.23	108.42
gene-KI387_031881	MYB-related	5.55	0	0	1.54	0	0	22.7	0	44.64	11.08	94.59	0	10.29	0	0	46.59	0	1.47	1.8	0	3.78	0	281.98	250.54	257.64	0	11.88	10.21	35.47	15.53	17.68	193.03	193.07	220.76	11.15	21.62	6.48	0	0	0	406.73	430.19	414.75	255.24	148.06	208.75
gene-KI387_031945	C2C2-Dof	0	0	0	0	0	0	0	0	0	0	0	0	0	0	0	0	0	0	0	0	0	0	0	0	0	0	0	0	0	0	0	0	0	0	0	0	0	0	0	0	0	0	0	0	0	0
gene-KI387_032058	B3-ARF	13.1	21.71	14.85	8.75	17.6	18.51	11.98	13.1	21.52	17.06	14.98	27.8	15.19	19.59	34.54	29.75	30.5	35.13	31.77	22.46	21.81	15.22	24.65	22.63	22.82	40.55	27.92	39.23	57.49	52.47	56.6	36.7	36.49	42.35	52.04	57.19	47.47	63.84	60.99	62.75	47.73	37.5	39.73	47.98	50.53	43.88
gene-KI387_032121	C2H2	4.07	24.88	10.38	11.32	0	0	0	0	0	0	0	0	0	0	0	0	0	0	0	0	0	0	0	0	0.08	16.32	17.97	20.58	6.64	6.97	8.29	0.07	0.14	0.07	17.58	17.12	14.36	22.91	18.15	23.81	0	0	0	0.29	0.26	0.49
gene-KI387_032178	AP2/ERF-ERF	45.57	44.05	4.75	38.86	47.02	90.72	520.69	161.43	714.56	220.97	1097.43	176.86	321.65	139.35	153.19	181.27	33.45	23.51	18.6	33.24	39.29	40.01	435.98	460.59	446.48	89.48	66.54	80.87	53.12	62.75	59	554.27	541.63	526.85	59.7	93.28	49.75	53.58	67.35	68.03	458.92	309.49	344.03	466.56	469.59	475.23
gene-KI387_032179	AP2/ERF-ERF	11.07	11.81	8.4	18.04	9.84	12.46	102.72	43.94	136.97	102.61	333.95	88.53	75.83	29.51	36.14	91.54	15.55	8.68	7.61	7.28	9.07	8.06	51.16	56.61	54.36	70.89	130.09	104.73	101.34	112.93	127.16	103.18	104.42	102.56	230.51	339.41	179	63.44	61.73	68.32	142.84	79.56	87.42	152.96	134.21	147.39
gene-KI387_032181	AP2/ERF-ERF	61.09	47.29	25.6	178.37	25.76	11.73	107.54	21.59	96.84	24.58	210.76	27.17	94.69	25.75	31.59	25.15	11.68	9.32	9.88	9.26	9.37	7.86	39.48	42.22	38.92	32.82	31.62	26.08	26.05	25.23	31.12	81.9	78.05	84.83	29.92	33.5	20.87	24.02	45.89	50.18	19.13	11.77	18.6	26.49	30.23	31.18
gene-KI387_032190	bHLH	5.12	9.11	4.3	2.81	3.65	2.97	2.19	3.84	5.44	3.79	3.9	6.86	2.98	3.35	6.94	6.64	8.25	7.35	8.32	4.84	6.06	3.64	0.85	1.79	1.08	1.91	3.08	3.58	6.07	5.94	4.5	4.68	4.19	4.08	7	4.48	4.83	8.09	8.71	6.52	2.02	2.35	2.08	3.71	3.18	4.74
gene-KI387_032240	MYB-related	7.17	12.95	9.38	8.95	11	7.69	9.08	10.72	9.98	9.01	10.08	8	15.74	11.9	18.71	6.69	7.86	7.6	7.5	7.73	7.7	7.08	8.35	6.01	8.05	8.2	11.58	8.26	10.55	16.03	12.94	5.71	10.4	9.99	11.03	7.76	11.56	13.67	19.14	19.53	3.54	3.81	3.88	6.26	2.63	2.66
gene-KI387_032281	B3-ARF	26.49	22.18	25	34.17	10.65	14.28	24.48	16.44	20.3	17.67	22.5	25.85	23.36	16.67	32.88	22.52	10.41	13.66	9.09	12.46	12.73	10.93	58.8	58.17	55.38	75.33	37.6	36.33	32.8	22.97	24.47	26.05	24.46	26.79	42.13	40.49	26.97	38.4	27.8	25	52.96	75.6	62.4	46.88	48.31	46.79
gene-KI387_032286	C3H	12.66	16.97	12.93	11.1	9.35	9.51	15.27	17.85	16.43	15.75	17.34	16.43	18.07	16.49	27.66	17.2	14.45	14.52	14.17	14.07	11.85	12.15	22.76	20.43	21.8	26.36	19.71	22.79	23.12	21.95	24.48	29.28	27.42	32.3	27.86	27.46	23.45	30.56	25.65	25.12	22.31	24.11	17.8	34.7	37.98	35.47
gene-KI387_032287	C2C2-GATA	10.41	7.14	0.79	9.09	0.76	9.48	0.84	1.52	2.21	2.66	6.36	3.44	0.1	3.62	24.21	2.46	2.55	2.51	3.01	5.13	3.42	2.58	15.54	12.32	15.59	7.38	5.21	1.97	10.16	10.6	13.24	1.18	1.39	2.68	28.47	29.71	18.86	4.23	2.72	3.45	30.75	26.84	29.96	14	12.84	9.06
gene-KI387_032288	C2C2-GATA	2.28	5.11	5.95	3.46	4.98	3.29	2.74	2.51	3.3	2.31	5.34	11	5.9	5.64	12.5	9.6	6.2	6.95	5.25	7.39	6.79	4.78	2.79	2.58	2.86	6.63	3.57	6.04	2.47	1.92	2.39	2.42	1.47	1.66	6.7	6.17	4.53	6.9	5.95	5.1	4.48	6.76	5.64	1.7	2.16	0.78
gene-KI387_032300	HB-other	0.31	2.7	1.28	0.53	4.9	2.48	1.05	2.68	1.07	3.88	1.16	6.9	3.01	8.14	5.58	5.1	73.57	100.48	82.62	49.02	33.28	30.75	4.76	9.77	8.89	1.81	2.85	4.82	15.9	24.06	19.06	3.49	2.55	3.85	7.48	6.46	4.81	15.9	11.53	15.08	3.82	3.98	3.25	1.76	1.17	3.35
gene-KI387_032302	NF-YA	15.25	19.37	21.92	14.8	12.91	18.64	18.38	10.35	19.33	16.03	15.33	17.19	26.86	18.66	38.77	25.78	19.67	16.48	17.43	13.54	13.93	8.44	6.58	7.29	13.27	31.67	31.53	43.23	10.91	12.49	15.04	13.67	11.27	17.74	40.18	45.36	47.83	39.33	46.85	43.07	17.63	12.75	16.46	15.54	12	15.68
gene-KI387_032311	BES1	0.2	0.19	0.16	0	0.24	0	0	0	0	0.11	0	0	0	0	0	0	0.29	2.42	1.09	0	0	0	0.48	0.69	1.37	0.33	0.47	0.12	18.77	12.43	16.69	0.54	0.65	0.65	0.92	0.95	0.23	19.46	16.51	23.45	1.18	1.15	0.63	0.13	0.24	0.26
gene-KI387_032313	LOB	0	0	0	0	0	0	0	0	0	0	0	0	0	0	0	0	0	0	0	0	0	0	0	0	0	0	0	0	0	0	0	0	0	0	0	0	0	0	0	0	0	0	0	0	0	0
gene-KI387_032343	HB-HD-ZIP	2.46	3.51	5.02	2.72	8.91	3.71	4.75	7.09	8.62	9.17	3.61	10.03	3.41	8.26	10.64	10.65	27.98	29.18	24.54	24.66	20.12	16.69	3.43	3.2	3.69	2.17	3.21	3.5	8.12	6.81	7.58	2.26	3.02	3.14	4.45	4.02	4.81	8.65	8.72	8.33	2.83	5.57	5.76	2.87	2.57	2.4
gene-KI387_032426	LFY	0.33	0	0.38	0.11	0.04	0	0	0	0	0	0	0	0	0	0	0	0.06	0.1	0	0.06	0.13	0	0.1	0	0.1	0.66	1.52	1.55	24.77	24.33	23.42	0.09	0.17	0.09	1.12	0.53	0.84	36.77	50.63	48.64	0.26	0	0	0	0	0
gene-KI387_032499	HB-WOX	1.14	1.19	1.01	0.89	0.69	1.19	1.06	1.36	1.81	1.2	1.31	1.77	1.39	1.9	2.98	2.84	1.3	1.81	2.17	1.52	1.03	0.82	2.93	2.1	2.04	1.28	1.78	2.38	1.53	2.4	1.48	3.72	4.46	4.13	0.76	2.08	0.9	1.85	1.94	1.3	4.89	2.84	2.88	4.49	2.52	4.45
gene-KI387_032509	GARP-G2-like	0	11.79	3.2	16.98	0	0	0	0	0	0	0	0	0	0	0	0	0	0	0	0	0	0	0	0	0	0	0	0	0	0	0	0	0	0	0	0	0	0	0	0	0	0	0	0	0	0
gene-KI387_032510	GARP-G2-like	3.56	0.76	0.11	21.25	86.54	79.54	232.08	181.79	251.91	173.33	259.63	157.9	223.97	154.28	137.14	147.67	3.6	2.72	1.69	1.55	1.08	1.14	5.06	4.65	2.06	0	0.32	0.16	0.22	0	0	16.37	16.06	14.61	0.18	0	0	0	0.17	0	1.24	2.45	2.04	3.11	2.12	2.1
gene-KI387_032513	GARP-G2-like	0	0.42	0	0.37	0	0	0	0	0	0	0	0	0	0	0	0	0	0	0	0	0	0	0.38	0.95	3.89	0	0	0	0	0	0	0	0.62	0.62	0	0	0	0	0	0	0	0	0	0.32	1.97	0
gene-KI387_032515	GARP-G2-like	0	0	0	0	41.2	66.15	8.37	21.55	12.67	23.01	21.01	43.22	13.02	38.04	38.12	36.33	34.43	23.56	26.4	16.11	15.48	17.11	0	0.45	0	0	0	0	0	0	0	1.35	1.34	2.69	0	0	0.81	0.53	0.84	0	0	0	0	0	0	0.86
gene-KI387_032516	GARP-G2-like	0.23	0	0	1.6	0.56	5.75	13.96	15.97	30.15	11.7	24.63	12.08	7.41	10.22	7.81	10.77	2.94	3.91	3.84	2.34	3.95	3.5	10.03	8.25	9.2	0	0	0	0	0	0.92	13.24	13.04	14.81	0	0.35	0.3	0.4	0.64	2.08	7.24	17.99	10.36	9.35	10.1	8.48
gene-KI387_032517	GARP-G2-like	0.42	0.4	0	4.14	0	0	0	0	0	0	0	0	0	0	0	0	0	0	0	0	0	0	1.48	2.14	2.39	0	0	0	0.36	0	0	9.05	5.92	7.75	0	0	0	0	0.57	0.62	0	1.82	1.96	11.65	10.86	8.7
gene-KI387_032519	GARP-G2-like	5.98	1.91	0.27	2.27	3.32	4.02	8.63	4.1	16.6	9.17	22.35	17.71	0.98	1.88	8.09	10.87	7.3	4.77	6.03	9.33	11.35	6.77	0.64	1.02	0.57	2.12	1.36	2.68	0	0	0	1.01	4.57	5.09	0.99	1.07	1.39	0.6	0	0	1.46	1.2	0	1.57	3.22	1.46
gene-KI387_032520	GARP-G2-like	14.08	3.25	8.75	2.25	6.21	22.47	14.95	16.54	29.38	76.05	47.89	53.87	6.89	23.86	15.12	60.08	2.37	1.29	1.03	3.14	1.65	2.15	2.27	2.71	5.42	10.41	16.54	19.52	1.59	1.42	0.48	8.25	8.59	6.29	2.61	3.56	6.62	0.64	1.26	1.36	1.03	1.61	0.99	1.62	3.11	2.05
gene-KI387_032521	GARP-G2-like	0	0	0	0	0	0	0.67	1.17	0.69	0	0	0	0	0.72	0	0	0	0	0	0	0	0	4.02	4.31	3.32	0	0	0	0	0	0	0	5.47	2.59	0	0	0	0	0	0	0.32	0	1.81	1.66	0	0.31
gene-KI387_032554	E2F-DP	5.1	8.5	6.46	5.98	7.4	7.5	8.47	11.08	8.51	8.97	5.34	13.47	7.58	8.84	15.33	12.54	9.84	8.4	9.99	10.85	8.67	6.92	6.49	6.3	7.96	2.47	3.37	3.18	5.15	4.75	5.36	8.61	10.41	8.89	3.76	4.24	4.23	5.21	5.94	5.87	2.36	5.27	4.53	6.7	4.99	6.13
gene-KI387_032560	RWP-RK	0.75	2.35	0.92	1.29	0.74	1.05	0.46	0.54	1.07	1.72	0.54	3.33	0.98	1.88	3.06	2.66	1.84	2.73	2.24	2.85	1.85	1.7	2.59	3.12	2.6	2.64	2.2	1.91	4.1	4.86	2.93	3.3	6	3.34	1.87	2.45	1.33	3.5	3.72	3.35	1.24	3.28	2.14	6.35	5.1	5.99
gene-KI387_032584	ULT	0.84	2.84	2.04	2.79	1.3	0.54	3.29	2.49	2.62	2.5	2.44	2.88	3.35	2.91	3.93	2.18	1.58	1.23	1.59	1.25	0.81	1.08	4.24	2.01	4.25	3.61	3.55	2.96	5.53	5.32	5.52	5.4	4.81	4.7	3.99	3.99	2.76	4.73	5.44	4.92	1.31	2.62	2.57	3.05	2.68	2.79
gene-KI387_032630	GeBP	0	0	0	0	0	0	0	0	0.77	4.26	0	0	0	0	0	7.58	54.38	64.44	58.81	24.8	39.91	65.29	26.34	77.8	90.76	73.64	59.87	58.99	125.52	85.21	85.43	257.69	229.8	237.45	123.04	53.61	54.78	138.18	120.81	134.19	222.8	216.09	237.78	364.18	427.15	388.01
gene-KI387_032639	HB-HD-ZIP	5.64	58.07	17.08	5.33	14.77	0	58.42	26.31	124.69	41.36	172.79	56.17	12.23	39.19	153.85	67.76	32.77	41.33	35.18	16.89	13.17	10.32	104.76	110.4	104.1	11.26	22.02	17.56	75.94	85.05	81.45	77.67	64.65	73.78	27.67	11.86	7.74	51.72	57.08	59.58	85.12	79.22	79.63	52.79	51.69	48.23
gene-KI387_032656	NF-YC	16.1	21.08	21.69	16.01	12.91	44.04	15.75	16.07	19.72	13.04	13.7	18.17	14.57	6.82	18.77	16.87	33.52	25.58	24.99	9.75	12.79	13.8	13.35	14.57	15.25	6.69	8.31	8.11	14.77	14.3	16.2	22.1	21.94	19.55	10.41	7.09	10.22	16.79	14.62	12.58	9.75	16.33	18.37	21.56	27.87	28.69
gene-KI387_032696	LOB	1.1	0.24	1.4	5.45	0.15	0.34	1.1	2.36	1.93	3.05	2.48	4.73	6.09	2.54	4.6	5.32	0.72	0.28	1.57	2.68	3.08	2.74	1.42	2.06	3.24	2.09	7.44	6.83	10.64	17.94	17.18	5.2	7.31	7.06	12.02	1.88	9.28	1.81	28.72	59.03	1.96	2.88	2.98	2.86	4.65	5.17
gene-KI387_032788	OFP	0	0.17	0	0	0	0	0	0	0	0.1	0	0.15	0	0	0	0	0.17	0.2	0	0	0	0	0	0	0	0.1	0	0.11	0.29	0.43	0.64	0.12	0	0.12	0.59	0.12	0	0.14	0.68	0	0	0	0	0	0	0
gene-KI387_033115	WRKY	0	0	0	0	0.02	0.28	1.13	2.09	2.29	7.05	3.69	11.72	2.02	2.65	11.22	11.53	0.34	0.68	0.25	0.13	0.26	0.27	11.44	11.04	12.7	11.41	11.64	13.03	6.49	5.39	4.45	15.71	15.44	19.66	7.94	9.44	6.38	1.48	1.91	1.81	6.39	15.77	13.57	12.34	13.86	12.37
gene-KI387_033155	Trihelix	11.65	34.44	13.59	37.06	10.14	14.45	1.26	3.67	1.92	4.95	7.56	4.48	6.25	8.38	32.37	6.07	8.62	7.09	9.17	5.11	5.01	5.37	0	0.06	0	41.14	35.72	34.83	17.32	17.46	22.41	2.86	2.31	2.72	48.3	49.25	50.38	12.11	12.27	17.08	0.73	0.14	0.54	2.39	2.7	2.32
gene-KI387_033174	MYB-related	0	0	0	0	0	0	0	0	0	0	0	0	0	0	0	0	0	0	0	0	0	0	0	0	0	0	0	0	0	0	0	0	0	0	0	0	0	0	0	0	0	0	0	0	0	0
gene-KI387_033242	HB-WOX	0	0	0	0	0.3	9.01	0	1.53	0	1.2	0	1.8	0	2.77	0	1.65	0	0	0	2.58	4.91	2.19	0	0	0	0	0	0	0	0	0	0	0	0	0	0.98	1.72	9.53	1.68	0.93	6.86	6.18	3.24	19.3	14.97	19.81
gene-KI387_033344	NF-YB	11.58	9.92	12.22	14.96	29.53	21.11	22.62	29.93	31.98	35.94	25.74	33.05	47.63	32.66	38.83	30.37	23.08	22.5	21.33	20.97	23.74	19.19	13.62	14.73	14.88	25.29	20.62	20.44	22.65	35.72	26.53	17.98	19.36	15.63	10.19	14.87	14.2	15.73	23.57	24.22	5.02	10.12	5.64	14.64	11.58	13.16
gene-KI387_033345	NF-YB	48.95	42.87	55.67	51.08	28.01	44.95	47.44	33.28	32.41	38.04	41.34	33.6	51.83	48	37.87	41.05	23.39	22.75	25.53	26.77	23.28	22.57	46.29	63.26	48.71	56.94	78.75	65.82	91.21	87.84	81.85	65.11	60.62	63.29	70.62	77.41	78.29	105.96	97.66	81.69	61.23	55.58	60.54	59	62.29	65.79
gene-KI387_033358	MYB-related	0	0	0	0	0	0	0	0	0	0	0	0	0	0	0	0	0	0	0	0	0	0	0	0	0	0	0	0	0	0	0	0	0	0	0	0	0	0	0	0	0	0	0	0	0	0
gene-KI387_033530	B3	0	0	0	0	0	0	0	0	0.08	0	0	0	0	0	0	0.09	0	0	0.06	0	0	0	0	0	0	0	0	0	0	0	0	0	0	0	0	0	0	1.05	0.33	0.36	0	0	0	0	0	0
gene-KI387_033567	MYB	10.06	14.17	13.24	8.93	9.89	20.56	6.28	7.46	13.67	15.31	15.21	24.76	7.37	13.22	28.79	25.61	26.79	27.11	25.36	17.45	16.46	9.6	14.84	17.79	15.84	40.52	34.51	37.75	39.46	34.95	38.43	23.31	24.96	21.68	34.63	29.08	36.17	27.92	36.64	37.39	17.12	12.67	12.57	24.55	22.9	18.17
gene-KI387_033633	Trihelix	0.18	0	0.5	0.17	0.08	0	0.43	0.14	0.81	0.33	0	0	0.25	0.17	0.29	0.29	0.17	0.12	0.24	0	0	0.06	0	0	0	0.2	0.21	0	0	0.21	0	0	0.34	0	0	0	0	0	0.17	0	0	0	0	0	0	0
gene-KI387_033649	MADS-M-type	0.2	0.19	0	0.17	0	0.14	0	0	0.3	0	0.27	0	0	0	0	0	0.39	0.46	0.37	0	0.27	0	0	0.29	0	0	0	0	0	0.26	0	0	0	0	0.28	0	0	0	0.55	0.3	0	0	0	0	0	0
gene-KI387_033769	TUB	7.78	18.53	10.19	7.14	26.04	48.94	14.71	27.39	27.73	33.93	32.7	53.28	12.72	30.8	60.26	53.35	109.75	126.11	105.13	74.55	65.38	57.03	23.52	23.74	19.34	15.87	16.99	16.17	40.05	42.93	42.56	28.1	30.21	31.17	21.26	20.54	17.51	59.95	50.92	54.82	23.33	19.02	19.01	28.9	24.12	24.32
gene-KI387_033871	C2C2-LSD	64.96	69.18	59.11	72.38	64.1	122.52	85.55	73.69	80.88	82.32	95.74	68.82	89.24	70.97	93.13	80.02	55.43	60.58	66.28	58.72	58.71	38.95	96.65	101.99	95.69	62.17	65.91	73.54	99.25	104.1	83.7	126.67	123.19	116.2	68.32	56.61	56.8	92.45	83.25	76.11	81.1	88.13	105.97	150.28	132.96	148.88
gene-KI387_033897	NAC	3.23	118.63	10.5	54	25.68	39.43	33.33	52.19	53.69	45.83	96.64	66.56	23.3	53.42	120.79	69.7	32.51	39.4	31.19	36.15	30.71	28.38	7.99	8.21	9.21	1.17	1.22	1.92	15.41	14.34	16.11	6.4	7.51	7.78	2.68	1.62	3.69	15.13	20.14	25.79	3.31	10.45	7.68	16.33	14.18	16.68
gene-KI387_034078	C2H2	4.78	13.91	9.58	9.84	15.95	30.02	20.63	23.99	23.96	30.65	16.13	33.14	22.19	26.72	32.47	28.78	16.63	19.23	18.23	16.72	12.38	10.7	9.33	8.38	8.99	16.53	14.89	20.39	15.47	14.88	12.95	5.82	5.96	5.46	25.53	22.12	19.38	6.76	8.77	8.73	4.94	6.17	5.53	4.83	6.62	6.11
gene-KI387_034113	NAC	29.79	36.54	23.05	68.5	18.14	0.4	52.03	25.64	79.9	26.13	79.25	28.87	41.51	18.35	28.67	27.7	6.22	7.37	7.78	18.57	23.39	16.46	9.36	13.78	11.92	9.95	13.32	5.45	4.76	2.75	6.78	4.86	7.03	6.61	7.78	12.91	11.2	4.72	5.4	9.94	10.23	10.52	6.09	8.63	8.39	11.86
gene-KI387_034116	NAC	122.07	89.65	114.71	228.59	31.24	23.18	197.92	68.78	224.81	61.77	257.91	66.14	153.19	63.77	36.13	69.48	6.94	8.11	3.44	21.39	27.09	17.11	26.9	34.52	27.88	112.06	131.26	154.44	86.27	79.72	114.46	26.74	32.41	31.07	151.86	138.57	116.81	40.24	54.74	88.96	18.41	13.04	17.08	30.05	26.83	27.92
gene-KI387_034242	C2H2	0	0	0	0	0	0	0	0	0	0	0	0	0	0	0	0	0	0	0	0	0	0	0.06	0	0	0	0	0	0	0	0	0	0	0	0	0	0	0	0	0	0	0	0	0.14	0	0
gene-KI387_034269	GRAS	0	0	0	0	0	0.21	0	0	0	0	0	0	0	0	0	0	0	0	0	0	0	0	0	0	0	0	0	0	0	0	0	0	0	0	0	0	0	0	0	0	0	0	0	0	0	0
gene-KI387_034390	NF-YC	0.39	0	6.28	0	0	0	0	0	0	0	0	0	0	0	0	0	0	0	0	0	0	0	0	0	0	0.51	2.19	0.54	2.92	5.4	3.88	0	0.62	0	4.17	3.23	5.62	38.9	58.8	65.04	0.58	0	0	0	0.56	0
gene-KI387_034401	B3	2.72	6.39	4.18	8.76	3.68	2.51	6.21	5.24	5.26	3.66	2.33	5.08	8.85	5.17	7.06	5.13	3.39	3.76	2.39	4.99	4.33	3.25	9.99	9.96	10.57	4.52	4.7	5.41	6.53	8.73	7.87	4.52	5.4	4.7	11	9.25	7.67	7.13	7.4	9.2	13.19	15.44	14.44	7.28	7.95	6.24
gene-KI387_034497	C3H	0.24	0	0	0	0	0	0	0	0	0	0	0	0	0	0	0	0	0	0.22	0	0	0	0	0	0	0	0	0	0	0	0	0	0	0	0	0	0	0	0	0.36	0	0	0	0	0	0
gene-KI387_034509	LOB	14.91	20.17	12.57	11.53	10.31	16.32	50.1	48.49	50.99	48.43	53.54	65.54	42.48	52.64	73.19	59.34	63.71	59.19	57.9	39.59	37.01	30.64	25.08	26.87	27.57	11.67	19.69	16.8	25.17	19.35	25.87	39.29	37.98	41.18	18.24	17.59	16.16	19.56	14.23	18.6	17.86	21.79	18.18	25.87	27	25.14
gene-KI387_034565	B3	0	0	0	0	0	0	0	0	0	0	0	0	0.47	0	0.27	0	0	0	0	0	0	0	0	0	0	0	0	0	0	0	0	0	0	0	0	0	0	0	0	0	0	0	0	0	0	0
gene-KI387_034629	B3	0	0	0.19	0.2	0.9	0.49	1.18	1.45	2.93	1.67	0.91	3.04	0.29	0.75	3.96	3.43	2.88	1.66	2.53	2.18	2.52	2	0.28	0.4	0.36	0	0	0.14	1.77	1.11	0.9	0	0.22	0.46	0.08	0	0.07	0.28	0.44	0.55	0.08	0	0.07	0	0	0
gene-KI387_034774	Trihelix	16.64	16.51	8.23	10.19	13.43	8.48	19.85	13.63	17.14	12.46	12.87	14.23	17.71	16.72	24.89	14.31	16.74	17.4	20.04	16.72	15.72	15.88	26.21	24.36	26.2	32.66	33.53	32.8	36.23	29.54	29.23	41.1	39.98	44.01	33.83	34.45	36.76	53.82	38.4	41.65	36.21	37.51	42.33	57.42	55.41	51.81
gene-KI387_034799	WRKY	1.26	6.65	5.65	2.96	1.04	5.32	0	0	0	0	0	0	0	0	0	0	0	0	0	0	0	0	17.29	21.68	20.37	50.7	56.23	34.89	324.67	256.12	292.61	11.84	11.95	9.91	67.95	75.6	44.36	63.45	66.7	45.98	72.75	70.28	58.38	42.9	38.91	43.03
gene-KI387_034816	MYB	8.77	19	6.82	11.7	19.03	0.62	0.98	2.76	1.3	4.81	2.48	7.69	1.07	1.82	4.9	8.83	21.49	23.27	19.24	22.17	26.52	27.1	27.16	23.4	23.39	4.15	8.94	6.43	24.45	26.85	24.25	4.85	5.27	4.88	11.44	7.85	7.7	37.2	32.53	29.87	3.55	2.04	2.55	0.61	0.81	0.87
gene-KI387_034842	bHLH	0	0	0	0	1.82	9.12	8.87	3.53	7.05	3.64	9.28	2.31	26.74	3.78	2.24	0.85	0.11	0	0	0.19	0.15	0.08	0	0.15	0.17	0	0.26	0.27	0	0.13	0.27	0.61	0.73	0.15	0	0	0.53	0.36	1.15	0.31	0	0	0	0	0	0
gene-KI387_034854	RWP-RK	0	0	0	0	0	0.57	0	0	0	0	0.12	0	0	0	0	0	0.1	0	0	0	0	0	0	0	0	0	0	0	0	0	0	0	0	0	0	0	0	0.34	0	0.85	0	0	0	0	0	0
gene-KI387_034974	MADS-M-type	0	0	0	0	0	0	0	0	0	0	0	0	0	0	0	0	0	0	0	0	0	0	0	0	0	0	0	0	0	0	0	0	0	0	0	0	0	0	0	0	0	0	0	0	0	0
gene-KI387_035128	GARP-G2-like	23.55	39.5	27.91	34.75	18.72	18.21	20.62	23.24	15.81	22.71	17.14	18.75	39.25	24.3	26.44	21.43	13.25	14.27	16.86	12.51	11.58	12.81	15.13	18.33	18.86	15.33	15.98	18.4	14.53	16.35	15.04	18.93	17.12	17.65	13.53	14.45	15.1	19.9	14.38	16.26	11.98	16.12	14.01	17.05	16.89	18.79
gene-KI387_035142	SAP	9.5	8.07	15.44	6.23	3.32	0	0	0.18	0.08	0.22	0.07	0.65	0.07	0.34	0.22	0.38	3.89	11.95	1.46	0.28	0.27	0.62	22.13	25.37	27.4	7.39	11.73	9.13	56.11	51.11	50.13	1.06	0.59	1.03	8.57	14.18	10.6	18.42	15.12	15.49	15.87	9.04	8.52	2.02	2.52	2.97
gene-KI387_035146	SAP	4.95	6.64	3.68	4.48	3.32	4.27	0.4	0.83	1.89	2.23	3.37	5.81	0.54	1.82	5.63	5.61	11.97	15.71	13.84	9.8	7.04	7.44	8.02	6.52	8.55	8.69	9.66	13.15	38.41	40.2	35.07	9.21	7.4	6.53	5.62	6.78	5.69	11.6	9.49	7.45	10.67	6.41	9.4	15.17	15.39	16.98
gene-KI387_035147	SAP	2.12	1.21	4.25	1.71	6.38	0	0.32	0.28	0	0.15	0.37	0	0.4	0.09	0.37	0.29	1.5	1.93	1.46	1.46	0.72	1.98	6.57	9.47	9.28	0.66	0.77	1.41	34.03	36.35	33.4	15.51	15.17	14.49	1.13	1.7	1.47	15.32	14.19	18.18	27.04	31.21	23.28	18.83	19.83	20.07
gene-KI387_035148	SAP	2.02	1.72	1.78	0.67	0	0	0	0	0.1	0	0	0	0	0	0.18	0	0	0.06	0	0	0	0.11	0	0.11	0	1.56	1.53	0.76	1.25	0.65	0.7	0.1	0	0.1	0.92	0.32	1	0.61	0.49	0.42	0.41	0.13	0	0.14	0.56	0
gene-KI387_035180	AP2/ERF-ERF	0.18	0	0	0.31	7.33	0	1.51	3.24	1.55	1.87	1.16	7.99	1.71	4.91	3.14	3.39	29.31	29.12	20.46	15.84	14.05	14.99	0.63	0.26	0	0.43	0.22	1.36	0	0	0	0.26	0	0	0.76	0.26	1.6	0	0	0	0	0	0	0	0.23	0
gene-KI387_035201	GRF	0.62	2.69	1.18	2.26	0.03	0	0	0	0	0	0	0	0.04	0	0	0	0.24	0.32	0.45	0	0	0	0.91	1.06	0.56	1.13	1.4	1.06	8.38	9.69	9.14	0.16	0.31	0.05	2.88	1.53	2.36	37.23	29.21	31.98	0.16	0.2	0.26	0.11	0.39	0.21
gene-KI387_035230	C3H	0.63	11.27	2.2	1.46	0.38	0.37	3.19	8.03	9.15	10.7	8.52	32.39	2.23	7.96	30	26.2	7.72	7.26	9.2	0.98	0.91	0.97	3.77	4.96	3.02	29.2	33.38	25.66	29.63	37.37	32.73	6.77	6.06	5.89	37.71	31.12	47.51	28.98	36.26	33.39	11.09	6.1	6.56	13.53	11.43	8.26
gene-KI387_035255	MYB	5.1	0.99	0.92	1.81	2.58	2.03	3.94	5.39	2.55	3.51	1.61	3.95	4.84	3.59	3.63	3.15	2.83	3.29	3.05	4.08	3.39	2.83	5.26	5.35	5.66	6.99	5.6	7.84	3.82	3.33	3.95	4.89	4.24	4.48	5.56	5.89	5.93	5.69	5.92	6.17	5.28	6.12	5.54	3.9	3.66	2.49
gene-KI387_035317	bHLH	0.63	4.42	0.97	0.48	0.73	0	0.1	0.67	0.4	0.09	0	0.26	0.08	0.1	0	0.58	1.32	1.58	1.38	0.2	0.22	0.52	35.06	32.78	29.91	37.75	37.85	32.61	39.1	37.21	33.83	10.65	12.1	11.72	41.91	33.97	33.16	66.82	50.62	55.47	21.43	23.76	25.15	13.19	14.34	13.13
gene-KI387_035402	MADS-MIKC	4.17	6.93	4.97	5.02	5.37	0	0	0	0.17	0.45	0.62	0.22	0.96	0.35	0.62	0.4	0.25	0	0.12	1.11	0.27	1.2	0.84	1.26	1.58	0.29	1.36	0.77	68.77	62.57	71.85	0	0	0	2.57	3.01	1.22	185.07	179.86	183.53	5.93	7.24	4.87	0	0.31	0.33
gene-KI387_035424	MADS-M-type	0	0	0	0	0	0	0	0	0	0	0	0	0	0	0	0	0.86	1.4	0.85	0	0	0	0	0	0	0	0	0	0	0	0	0	0	0	0	0	0	0	0	0	0	0	0	0	0	0
gene-KI387_035449	bHLH	10.01	17.03	12.45	9.25	12.43	12.24	8.97	14.05	13.52	14.35	7.59	13.54	13.31	13.2	15.76	12.96	10.96	16.3	13.8	10.95	15.51	11.91	29.47	31.11	30.12	27.06	26.48	19.14	45.66	45.65	42.88	28.55	25.9	26.7	28.64	26.82	20.48	38.24	30.77	28.79	31.24	36.24	35.11	34.92	29.44	28.61
gene-KI387_035455	HB-KNOX	59.72	83.84	62.11	78.27	39.53	22.69	48.54	45.17	37.69	32.94	44.03	47.6	44.5	48.02	59.06	50.47	59.97	61.07	58.14	67.31	66.28	59.96	44.95	48.79	48.55	115.49	120.44	121.6	86.89	74.68	89.26	57.62	58.38	58.9	134.62	102.68	92.87	109.81	103.41	106.52	37.92	44.24	46.32	85.34	92.15	82.4
gene-KI387_035556	B3-ARF	12.62	19.86	9.3	37.83	7.19	11.47	5.9	4.49	4.51	6.17	4.42	7.15	4.93	8.21	8.41	5.7	23.85	28.54	24.31	21.53	19.38	15.03	6.51	5.23	5.56	13.36	11.72	14.92	5.07	4.56	4.34	8.14	9.36	10	25.14	29.71	17.03	14.36	13.56	16.64	3.62	3.76	3.23	5.91	5.86	6.19
gene-KI387_035566	GARP-G2-like	0	0	0.27	0	5.31	0.45	0	0	0	0	0.53	1.63	0	0	0.59	1.47	4.48	3.8	2.74	1.38	0.67	0.71	0	0	0	0.86	2.28	1.35	0.61	0.91	0	0	0.51	0	0.5	4.84	4.21	2.43	1.92	1.05	0	1.21	0.47	0	0	0
gene-KI387_035591	C3H	5.15	8.89	5.71	5.2	4.91	7.48	5.14	8.5	9.08	9.01	7.25	14.59	6.05	10.74	13.91	12.1	10.54	12.41	11.05	10.46	8.86	7.98	5.3	4.17	3.77	6.54	7.39	8.85	12.25	11.38	11.8	7.35	7.08	8.33	8.56	8.98	7.23	9.38	10.07	10.89	3.4	3.69	4.31	8.04	8.01	9.36
gene-KI387_035593	bZIP	14.66	25.56	18.35	16.07	30.67	25.32	9.49	16.99	16.11	20.55	30	34.47	10.05	25.52	51.39	36.38	40.09	43.53	42.89	50.11	48.52	40.41	40.39	36.08	36.28	37.17	35.8	30.77	52.87	53.54	60.51	55.5	55.77	59.27	37.86	34.47	30.35	84.67	58.59	51.79	39.21	44.41	41.84	53.73	51.01	52.11
gene-KI387_035603	HB-HD-ZIP	13.61	62.67	29.07	8.17	29.55	8.58	0.3	1.72	2.28	3.02	11.28	14.81	0	9.27	38.18	20.1	102.68	113.38	85.99	67.14	68.57	61.16	4.22	3.91	3.8	46.57	44.93	63.23	18.85	17.3	16.86	18.79	22.81	22.57	94.82	75.17	87.04	21.36	17.47	23.96	3.11	3.32	3.57	14.06	16.08	11.95
gene-KI387_035657	MYB-related	0	0	0	0	0	0	0	0	0	0	0	0	0	0	0	0	0	0	0	0	0	0	0	0	0	0	0	0	0	0	0	0	0	0	0	0	0	0	0	0	0	0	0	0	0	0
gene-KI387_035659	MYB-related	0	0	0	0	0	0	0	0	0	0	0	0	0	0	0	0	0	0	0	0	0	0	0	0	0	0	0	0	8.24	4.48	4.56	0	0	0	0	0	0	0	0	0	0	0	0	0	0	0
gene-KI387_035687	NAC	342.27	26.45	25.88	69.7	94.74	158.28	608.71	291.76	699.95	243.53	527.33	244.52	362.37	162.01	81.29	249.97	39.18	31.72	28.4	40.63	37.49	37.55	351.46	334.18	325.25	317.21	212.86	197.4	360.04	337.85	336.37	251.56	247.01	255.11	304	400.42	253.3	119.47	206.2	174.23	280.64	253.39	260.93	220.54	215.94	218.27
gene-KI387_035713	HB-WOX	0	0	0	0	0	0	0	0	0	0	0	0	0	0	0	0	0	0	0	0	0	0	0	0	0	0	0	0	0	0	0	0	0	0	0	0	0	0	0	0	0	0	0	0	0	0
gene-KI387_035715	HB-WOX	0	0	0	0	0	0	0	0	0	0	0	0	0	0	0	0	0	0	0	0	0	0	0	0	0	0	0	0	0	0	0	0	0	0	0	0	0	0	0	0	0	0	0	0	0	0
gene-KI387_035786	B3	7.54	4.77	5.56	8.16	6.05	9.38	18.6	12.86	11.07	11.44	9.9	15.53	13.56	14.19	15.93	12.08	6.7	5.76	5.67	13.18	9.56	7.84	11.45	8.88	8.62	5.89	5.04	6.16	8	7.05	7.52	9	9.26	11.65	5.49	4.83	5.5	8.95	6.99	7.21	10.22	10.66	9.43	10.13	10.89	9.84
gene-KI387_035806	MYB	20.26	55.44	27.24	155.47	79.48	125.68	139.64	99.78	97.97	100.24	82.23	86.85	149.28	117.27	53.4	102.94	60.84	42.2	53.62	77.38	85.8	88.82	29	27.49	28.07	51.25	35.19	42.06	79.46	106.39	79.86	70.82	79.62	83.12	49.24	24.9	57.53	45.62	63.8	80.8	17.92	30.46	28.98	41.8	38.91	44.71
gene-KI387_035807	MYB	4.33	12.29	5.09	6.52	8.03	0	2.61	1.11	0.24	1.1	0.66	3.26	0.2	1.28	3.4	5.21	27.7	30.09	20.26	24.65	33.66	23.7	21.33	26.77	25.08	20.06	34.47	36.36	45.14	59.17	48.53	7.79	6.89	8.62	40.35	21.97	25.67	67.79	68.28	78.36	15.38	15.69	12.22	8.12	5.68	9.13
gene-KI387_035814	MYB-related	1.37	14.5	1.08	3.44	0.75	0	0	0	0	0	0	0	0	0	0	0	0.35	0	0	1.12	0	0	0	3.3	7.67	3.13	14.34	15.7	0	3.18	10.67	28.82	4.24	16.45	41.63	13.03	0	4.06	3.3	0	0	0	3.06	12.8	17.4	10.21
gene-KI387_035829	NAC	11.03	3.15	45.73	6.59	1.5	9.07	5.36	11.21	8.86	15.9	8.48	25.61	11.5	5.12	18.47	16.13	0.35	0.28	0	0.9	3.18	2.6	0.72	1.71	0	7.7	28.68	18.06	10.25	5.06	5.7	2.84	1.15	1.15	16.75	11.41	8.96	0	0.53	0.6	1.51	5.44	3.64	0	3.1	1.64
gene-KI387_035830	NAC	2.01	0.5	21.22	5.2	0	2.77	1.17	6.44	3.7	4.65	2.83	4.79	2	0.43	4.55	6.81	0.25	0	0	1.48	0.86	3.05	1.38	0.38	0	1.19	7.85	2.3	4.01	1.99	2.69	0.75	1.11	0	6.19	4.28	1.64	0.44	0.35	0.37	2.62	1.74	0	1.14	0.34	1.43
gene-KI387_035831	NAC	0.5	0.24	0.41	0.64	0	0.09	0	0.19	0	0.44	0.59	0.44	0	0.86	0.75	0.58	0	0	0	0	0.17	0.09	0.62	0.87	0.77	0.28	0.3	0.6	1.63	0.76	1.52	0.17	0.33	0.67	0.33	0	0	0.41	1.13	0.69	0.33	0.21	0.32	0	0	0
gene-KI387_035834	NAC	0	0	0	0	0	0	0	0	0.2	0.37	0	0	0	0	0.76	0.49	0	0	0	0	0	0	0.25	0.21	0.24	0	0	0	0.5	0.37	0	0	0	0	0	0	0.18	0	0.59	0	0	0	0.58	0	0	0
gene-KI387_035835	NAC	0.74	0.36	1.62	0.21	0	0.43	0	1.66	0	1.18	0	0.87	0	0.86	0.15	0.38	0	0	0	0	0.5	1.34	0	0	0	0	0.29	0.15	0	0.91	0	0	0	0	0	0	0	0	0	0	0	0.21	0	0	0	0
gene-KI387_035836	NAC	0	0	2.45	0	0	0	0	0	0	0	0	0	0	0	0	0	0	0	0	0	0	0	0.91	1.01	2.25	1.03	1.52	0.22	133.23	125.92	126.25	0.25	0	0.73	2.44	4.08	2.64	4.16	2.35	2.28	3.14	3.32	2.08	2.01	0.89	0.72
gene-KI387_035837	NAC	0.34	0.65	29.53	1.44	0	0	0	0.27	0.47	0.21	0.21	0.95	0.39	0	0.44	0.28	0	0.13	0.15	0.71	2.63	5.21	0.29	0.24	0	1.58	1.45	0.21	26.92	24.04	21.38	0	0	0	6.04	5.83	2.94	18.12	24.39	16.89	1.38	0.29	0.44	0	0.64	0
gene-KI387_035965	MADS-MIKC	0.98	0.23	0	0	0	0	4.06	1.3	2.66	1.72	4.73	3.07	2.82	3.6	8.64	4.56	0	0	0	0	0	0	0.44	0.36	0	1.48	0.94	0.63	11.49	16.76	16.62	1.42	0.35	1.41	1.39	0.37	1.59	9.32	4.02	4.36	0	0	0.33	0.36	0.32	1.02
gene-KI387_035966	MADS-M-type	0	0	0	0	0	0	0	0	0	0	0	0	0	0	0	0	0	0	0	0	0	0	0	0	0	0	0	0	0	0	0	0	0	0	0	0	0	0	0	0	0	0	0	0	0	0
gene-KI387_035986	C3H	16.42	19.14	19.14	14.06	25.86	32.68	9.84	16.73	13.1	21.8	21.29	23.52	14.79	25.01	25.43	25.04	33.78	41.78	36.84	32.05	26	16.73	17	18.87	19.65	10.24	9.22	14.98	23.49	26.4	22.65	23.68	22.62	21.51	22.28	18.08	21.87	23.27	25.48	28.79	15.75	13.41	15.26	13.95	13.79	15.56
gene-KI387_035996	B3	2.52	1.56	1.76	0.94	2.75	2.01	6.37	6.38	4.47	5.4	2.78	7.37	9.43	7.18	9.98	7.75	13.31	13.73	13.71	12.42	8.86	9.17	5.37	6.33	6.56	7.37	6.32	8.22	5.64	5.84	5.4	4.91	4.89	6.79	8.09	8.25	9.81	7.45	8	7.95	7.63	7.81	6.25	6.11	6.22	6.07
gene-KI387_036076	NAC	4.4	0.7	3.87	4.37	1.07	13.48	1.34	10.41	0	18.9	3.01	12.25	4.03	2.93	4.09	6.81	0	0	0	0	0.24	0.77	30.3	25.62	29.35	4.77	11.23	4.52	8.87	3.03	4.14	6.27	3.44	3.45	13.93	19.87	5.24	2.02	2.14	2.34	11.49	22.8	16.64	6.52	5.19	11.46
gene-KI387_036077	NAC	0.42	0.27	3.34	0	0.77	4.29	8.87	27.5	14.61	31.71	40.1	40.1	3.12	23.37	44.41	41.59	0.41	0	0.13	14.91	10.14	10.75	3.3	1.19	1.99	0.49	2.55	0.17	1.87	0.69	1.04	0	0	0	2.1	1.79	0.69	0.23	0.18	0	2.66	0.95	0.91	0.59	0.7	0.94
gene-KI387_036079	NAC	0	0	0	0	0	0	0	0	0	0	0	0	0	0	0	0	0	0	0	0	0	0	2.16	0	0	1.91	5.62	1	12.28	5.56	7.25	1.14	0	0	2.23	7.23	5.24	0	0	0.58	1.64	2.01	3.12	2.96	3.11	2.73
gene-KI387_036084	NAC	0.4	1.68	4.19	0.23	0	0	0	0	0	0	0	0	0	0	0	0.21	0	0	0	0	0	0	2.02	1.71	1.69	7.1	28.61	8.38	14.89	11.75	12.08	0.56	0	0.18	10.57	5.87	4.41	6	9.83	6.24	0.36	0.45	0.52	0.37	0.17	0.89
gene-KI387_036085	C3H	9.69	12.02	11.17	9.57	11.1	16.1	12.24	13.72	13.72	13.18	11.67	18.46	14.23	17.47	23.78	18.84	20.21	19.63	17.6	14.84	13.8	11.53	14.01	13.03	13.32	21.88	15.34	19.77	17.21	15.44	18.16	16.88	16.88	17.69	21.26	20.35	17.58	21.33	19.39	20.95	15.04	14.22	13.75	15.01	17.69	13.64
gene-KI387_036094	MADS-M-type	0	0	0	0	0	0	0	0	0	0	0	0	0	0	0	0	0	0	0.32	0	0	0	0	0	0	0	0	0	0	0	0	0	0	0	0.54	0	0	0.66	0	0	0	0	0	0	0	0
gene-KI387_036120	bHLH	0	0	0.04	0	0.13	0	1.95	2.11	1.16	2.5	1.59	3.69	1.22	4.07	4.05	4.99	0.21	0.33	0.39	0.27	0.22	0	0.17	0.29	0.24	0	0.06	0.13	0	0	0	0.14	0	0.07	0	0.07	0	0.26	0.34	0.29	0	0.09	0	0	0.06	0
gene-KI387_036124	bHLH	0	0	0	0	0	0	0	0	0	0	0	0	0	0	0	0	0	0	0	0	0	0	0	0	0	0	0.1	0.21	0	0	0	0	0	0	0	0	0.1	0	0.34	0	0	0.15	0	0	0	0
gene-KI387_036170	AP2/ERF-ERF	1115.32	3.25	3.74	11.53	74.51	141.53	644.49	399.4	644.39	394.73	427.98	204.37	434.73	213.01	20.95	206.24	8.1	7.05	4.69	5.85	7.67	6.79	2926.75	3035.21	3142.82	603.51	262.01	286.64	363.83	279.26	266.34	3034.12	3019.47	2975.3	136.14	80.98	96.01	397.21	276.9	176.03	5257.65	5543.82	5613.47	5742.9	5767.37	5746.24
gene-KI387_036198	LOB	0	0.5	0	0.35	0.5	14.52	0	0	0.83	0.75	0	0	0	0.88	0.82	0	0	0	0	0	0	0	0	0	0	0	0	0	0	0	0	0	0	0	0	0.69	0.6	0	1.22	1.34	3.74	1.52	0.59	0	0	0.72
gene-KI387_036215	DBB	0	0	0	0.98	0	0	0.38	0.22	0	0	0.17	0	0	0	0	0.23	0.56	0.22	0.13	0.12	0	0	5.03	3.64	5.39	1.97	3.1	2.28	0.95	0.71	1.24	0.79	0.19	0.58	7.38	6.67	2.44	1.89	1.5	3.02	9.64	6.77	9.22	0.8	1.24	0.76
gene-KI387_036237	bHLH	0.4	0.97	0.98	1.03	6.43	1.6	4.72	12.37	5.22	6.67	4.74	9.69	3.14	6.35	7.95	7.21	41.93	62.88	43.27	25.45	28.71	27.98	0.73	1.52	1.69	1.46	2.11	1.44	4.6	5.18	3.85	2.16	0.59	1.45	1.33	0.64	0.83	1.77	0.92	1.46	1.32	2.49	2.02	4.2	2.07	3.78
gene-KI387_036290	LOB	0.45	0.21	0	2.1	0	0	5.9	3.84	1.01	3.96	1.21	1.81	3.06	3.2	4.77	4.04	0	0	0	1.68	2.11	1.43	0	0	0	0	0	0	0	0	0	0	0	0	0	0	0	0	0	0	0	0	0	0	0	0
gene-KI387_036653	WRKY	2.65	8.11	3.49	1.2	3.2	18.31	5.53	26.04	24.32	114.45	124.3	234.58	6.14	19.06	1.02	232.51	2.26	1.02	0.7	0.29	0.86	1.11	24.52	30.07	27.27	75.55	120.29	92.86	140.4	113.55	145.32	13.52	13.01	10.62	345.84	539.73	261.8	33.35	28.8	34.65	72.75	65.74	65.42	61.02	59.28	62.35
gene-KI387_036722	WRKY	1.13	0.62	2.51	0.41	0.29	1.56	0.87	6.59	3.13	50.9	4.43	55.67	0.92	2.59	0.21	75.4	0.31	0	0	0.14	0.55	0.7	16.18	17.03	18.67	11.46	31.34	18.73	6.21	7.64	8.07	0.45	1.32	0.44	34.99	43.93	29.35	0.81	2.35	1.15	8.57	5.78	9.04	2.51	2.63	3.26
gene-KI387_036829	bHLH	0	0	0	0	0	0	0	0	0	0	0	0	0	0	0	0	0	0	0	0	0	0	0	0	0	0	0	0	0.35	0.52	0.26	0	0	0	0	0	0	0.94	1.02	0.3	0.29	0	0	0	0	0
gene-KI387_036896	GRAS	4.61	2.44	3.74	2.59	1.09	0.38	0.8	5.54	3.62	5.81	5.59	12.24	1.74	6.78	16.29	12.07	8.35	6.61	10.99	15.48	13.6	11.19	0.17	0.05	0.36	10.84	9.95	10.92	13.93	10.84	11.8	0.73	0.61	0.53	17.32	18.82	9.22	14.33	12.41	12.33	0.49	0.34	0.47	0.18	0.16	0.26
gene-KI387_036916	GRAS	0	0.2	0.04	0.04	0	1.31	2.63	2.83	2.63	2.58	2.62	1.87	2.93	2.77	2.61	2.81	0.14	0.34	0.63	1.36	1.81	1.31	0.31	1.39	1.03	0	0.44	0.11	0.51	0.06	0.57	0.71	0.06	0.25	0.53	0.13	0.73	0.7	0.61	1.53	0.38	0.4	0.18	0.38	0.17	0.54
gene-KI387_036931	HB-WOX	0	0.32	0	0	0	0	0	0	0	0	0	0	0	0	0	0	0	0	0	0	0	0	0	0	0	0	0	0	2.32	1.46	1.59	0	0	0	0	0	0	0.89	0.85	0.46	0	0	0	0	0	0
gene-KI387_036964	GARP-G2-like	0.33	0.45	0.16	0.34	0	0	0	0	0	0	0	0	0	0	0	0	0	0	0	0	0	0	1.59	1.37	1.62	1.4	1.92	1.18	0	0.08	0.31	0.71	0.77	1.3	1.92	0.81	1.16	0	0.08	0	0.17	0.11	0.08	0.18	0.4	0.09
gene-KI387_036971	GARP-G2-like	0.33	0.19	0.33	0.69	0	0.09	0	0	0	0	0	0	0	0	0	0.1	0	0	0	0	0	0	0.21	1.29	0.61	0.52	0.7	1.27	0.11	0	0.08	0.54	0.26	0.35	0.97	0.91	0.62	0	0	0	0.26	0.55	0.42	0	0	0.52
gene-KI387_036988	HB-WOX	0	0	0	0	0	0	0	0	0	0	0	0	0	0	0	0	0	0	0	0	0	0	0	0	0	0	0	0	0	0	0	0	0	0	0	0	0	0	0	0	0	0	0	0	0	0
gene-KI387_037024	HB-WOX	0	0	0	0	0	0	0	0	0	0	0	0	0	0	0	0	1.73	4.51	2.06	0	0.08	0	0.39	0.17	0.18	0	0.56	0.14	0.39	0.58	0.72	0	0	0.47	0	0.16	0.57	0	0.15	0.16	0	0.2	0.91	0	0	0
gene-KI387_037026	SRS	6.19	9.22	6.69	5.98	9.34	11.38	11.35	9.95	9.62	12.13	5.74	13.3	13.23	10.45	16.4	11.84	7.74	11.71	10.76	9.18	7.3	8.56	6.62	12.14	5.47	14.94	18.22	9.56	14.65	13.68	12.75	11.96	9.21	15.18	10.89	14.66	18.5	8.5	12.63	18.58	13.82	10.34	9.51	18.78	19.97	17.24
gene-KI387_037057	C3H	0.1	0.38	0	0.17	0.36	0.41	0	0.85	0	0.23	0.23	0.33	0	0.26	0.46	0.59	0.77	0.45	1.08	0.17	0.33	0.07	0	0	0.15	0.33	0.11	0.59	1.11	0.35	0.47	0	0	0.13	0.65	0.27	0.58	0.64	0.38	0.81	0	0	0.12	0.13	0.12	0.38
gene-KI387_037069	AP2/ERF-ERF	1.09	2.01	0.75	1.33	0.06	0.19	2.58	2.6	2.99	2.49	1.99	5.83	1.14	2.06	4.53	3.39	1.07	0.42	1.09	0.46	0.06	0.33	6.49	6.93	7.27	0.1	0.43	0.98	7.79	9.64	10.92	3.32	3.32	2.52	0.84	0.37	0.54	8.26	3.38	3.12	3.48	9.23	9.09	3.57	2.74	3.67
gene-KI387_037094	LOB	0.66	0.32	0	0.28	92.85	95.83	45.17	59.03	49.48	58.2	64.85	71.88	42.98	59.72	64.55	42.66	84.69	75.15	90.88	100.02	100.09	76.64	6.9	9.03	7.29	0	0	0	0	0	0	1	1	4.51	0	0	0.46	0	0	0	0.48	4.15	5.49	0	0.45	0.48
gene-KI387_037120	Trihelix	25.89	52.46	38.98	13.28	18.11	18.32	12.14	10.53	15.07	13.77	14.78	19.4	14.24	11.35	14.27	14.54	32.67	42.31	37.54	18.04	23.23	23.33	24.32	27.76	26.71	44.1	42.84	40.97	47.64	41.78	43.18	38.29	41.09	44.29	44.51	48.66	51.6	70.81	59.19	48.9	42.9	23.64	30	42	35.66	32.61
gene-KI387_037163	bHLH	7.82	9.02	9.44	2.86	8.82	0.12	2.93	5.67	2.31	3.66	3.12	6.79	1.67	5.44	5.22	5.33	33.6	56.94	29.77	12.37	10.73	9.25	38.62	34.77	36.41	4.83	8.98	7.38	22.97	24.15	28.01	5.82	7.5	7.36	24.64	18.24	10.18	13.32	5.95	8.85	14.67	13.53	11.85	3.51	4.16	3.61
gene-KI387_037173	WRKY	1.85	15.99	2.85	4.56	6.41	0.68	12.05	23.64	18.68	35.37	13.37	30.56	8.66	15.96	9.04	23.87	2.23	2.24	1.89	6.13	7.62	8.09	16.92	18.49	17.15	13.53	10.02	10.87	10.98	10.03	9.88	7.7	5.15	7.09	13.8	13.85	6.75	12.07	11.63	9.48	28.31	40.9	41.25	9.94	9.13	10.83
gene-KI387_037229	TUB	18.15	22.64	18.9	22.06	21.89	18.1	24.33	26.87	25.05	39.04	28.06	34.35	22.77	28.48	34.08	35.82	26.68	28.46	23.18	21.68	20.28	19.02	42	43.16	44.98	45.49	51.57	55.86	39.84	42.09	39.68	39.11	44.13	42.81	48.94	46.95	44.08	53.63	60.28	62.65	39.07	53.75	47.23	43.24	44.67	35.25
gene-KI387_037252	LOB	7.06	5.33	5.09	4.89	2.03	6.96	5.26	4.26	5.17	4.88	3.38	5.03	4.45	2.23	5.68	4.75	4.57	4.1	4.46	5.5	2.51	3.62	6.02	6.73	4.81	5.89	5.36	4.59	8.18	8.61	8.01	8.26	6.9	8.35	2.54	6.28	4.18	7.89	7.57	9.85	9.4	11.48	7.68	14.53	12.7	14.29
gene-KI387_037272	LOB	0	0	0	0	0.42	1.52	0	0	0.18	0.16	0	0.24	0	0	0	0	0	0.18	0	0.2	0.32	0.08	14.42	15.98	17.43	0	0.15	0	0	0	0	2.04	3.18	3.7	0	0	0.15	0	0	0.17	6.09	6.95	7.22	4.15	5.05	5.22
gene-KI387_037296	CAMTA	15.6	19.42	18.99	10.66	19.38	17.97	34.08	31.6	40.36	39.3	32.18	50.67	35.59	40.38	60.37	48.96	28.67	31.03	27.76	30.85	25	22.44	22.49	19.37	20.15	29.57	33.45	31.33	39.47	33.5	38.66	22.97	22.35	25.78	41.93	42.85	37.86	43.62	44.37	49.55	21.04	22.81	20.45	18.46	20.34	18
gene-KI387_037391	bZIP	0.21	0.95	0.12	0.66	4.86	30.59	28.91	14.08	43.94	19.51	71.33	28.68	6.98	32.12	59.96	26.03	11.95	13.74	8.49	18.42	15.62	9.56	5.05	4.6	4.16	0.21	0.08	0	4.52	4.01	4.49	0.47	0.45	0.46	0.09	0	0	2.14	1.6	2.38	1.74	1.51	1.58	0.19	0.08	0.09
gene-KI387_037422	C2H2	5.44	6.1	5.65	4.71	0	0	0	0	0	0	0	0	0	0	0	0	0	0	0	0	0	0	0.63	0.54	1.05	13.01	12.5	14	0.39	0.64	0.64	3.87	3.46	5.29	21.32	19.59	15.61	2.13	1.06	1.2	8.22	7.8	7.4	13.45	9.99	11
gene-KI387_037425	C2H2	7.05	17.83	8.98	10.18	0.21	0	0.11	0.2	1.34	0.47	3.52	1.09	0	0.06	1.97	0.55	1.15	0.75	2.28	0.29	0.6	0.39	18.26	20.74	23.11	25.12	20.21	21.04	18.64	16.77	17.91	44.7	46.09	50.85	28.97	28.79	22.2	39.31	31.99	35.35	36.94	36.61	36.49	65.18	66.13	59.35
gene-KI387_037434	NF-X1	2.46	2.51	2.43	3.04	3.45	1.67	5.5	6.55	6.71	5.49	4.15	8.59	4.56	7.24	8.41	7.78	7.67	8.71	9.9	9.3	6.86	9.09	3.13	3.58	3.75	4.18	4.77	4.46	6.61	6.22	5.76	4.65	4.38	3.02	9.23	7.16	4.65	6.98	6.24	10.04	4.74	6.58	5.73	4.35	4.41	4.95
gene-KI387_037475	B3	0.17	0.34	0.25	0.37	0.58	0.08	0	0.12	0.22	0.2	0	0.73	0	0.57	0.2	0.12	0.35	1.21	0.78	0.92	0.9	0.13	0.32	0.13	0.13	0.23	0.13	0.22	1.09	0.68	0.36	1.15	0.59	1.08	0.73	0	0	0.46	0.47	0.83	0.13	0.17	0.13	0.11	0.33	0.34
gene-KI387_037477	B3	0.38	2.08	0.68	0.44	0.39	0.51	0	0.19	1.01	0.61	0.61	0.68	0.7	2.49	0.94	1.01	2.22	1.74	3.31	1.23	0.84	1	2.91	2.85	1.6	1.99	2.1	2	3.2	1.8	4.78	5.12	5.07	6.45	2.01	2.86	2.16	3.94	4.78	3.75	2.89	2.33	1.45	4.59	3.75	2.53
gene-KI387_037478	B3	0	0	0	0	0	0	0.24	0.62	0.37	0.56	0.56	0.82	0.3	0.39	1.01	0.65	0	0.04	0.14	0.04	0.03	0	0	0	0.23	0	0	0	0.08	0.06	0.06	0	0	0	0.4	0.34	0.29	0.41	0.45	0.41	0.07	0.08	0	0.07	0.18	0.07
gene-KI387_037480	B3	0.17	1	0.14	0.54	0.36	0.47	0.56	1.62	0.62	0.67	0.38	1.15	0.84	1.25	1.68	0.92	0.79	0.83	0.67	0.47	0.45	0.2	0.44	0.09	0.26	0.11	0.08	0.08	0.33	0.33	0.28	0.69	0.35	0.44	0.54	0.14	0.24	0.27	0.17	0.37	0.09	0.11	0.13	0.45	0.2	0.18
gene-KI387_037481	B3	0.45	0	0.11	0.06	0.71	0.09	0.08	0.53	0.55	0.43	0.14	1.26	0.06	0.17	0.86	0.92	1.51	1.33	1.3	1.14	1.27	0.37	0	0.88	0.29	0.07	0.22	0	2.66	2.44	1.97	0.51	0.49	0.25	0.25	0.61	0.07	1.03	1.22	0.87	0.08	0	0.08	0	0.08	0.08
gene-KI387_037482	B3	0.13	0.12	0	0	0	0	0	0	0	0	0	0	0	0	0	0	0	0	0	0	0	0.09	0	0	0	0.07	0.07	0	0	0	0	0	0	0	0	0	0	0	0	0	0	0	0	0	0	0
gene-KI387_037483	B3	0.81	2.07	1.54	0.23	0.16	0.37	0	0	0	0	0	0	0.36	0	0	0	0.26	0	0	0	0	0.19	0	0	0.45	0	0	0.35	0	0.35	0.36	0	0	0	0	0.41	1.8	0	0.37	0.81	0	0.48	0	0	0.36	0
gene-KI387_037485	B3	0	0	0	0	0	0	0	0	0	0	0	0	0	0.09	0	0	0	0	0	0	0.05	0	0	0	0	0	0.08	0.23	0	0	0	0	0.08	0	0.17	0.18	0.46	1.38	1.75	1.16	0.09	0.22	0.17	0.18	0.08	0.17
gene-KI387_037486	B3	0	0	0	0	0	0	0	0	0	0	0	0	0	0	0	0	0	0	0	0	0	0	0	0	0	0	0	0	0	0	0	0	0	0	0	0	0	0	0	0	0	0	0	0	0	0
gene-KI387_037487	B3	0	0	0	0	0.73	16.92	0	0.23	0	0.37	0.19	0.28	0.17	0	0	1.47	1.03	0.69	0.83	0.38	0.41	0.33	0	0	0	0	0	0	0	0	0	0	0	0	0	0	0	0	0	0.43	0	0	0	0	0	0
gene-KI387_037488	B3	0	0	0	0	0	0	0	0	0	0	0	0	0	0	0	0	0	0	0	0	0	0	0	0	0	0	0	0	0	0	0	0	0	0	0	0	0	0	0	0	0	0	0	0	0	0
gene-KI387_037490	B3	0	0	0	0	0	0	0	0	0	0	0	0	0	0	0	0	0	0	0	0	0	0	0	0	0	0	0	0	0	0	0	0	0	0	0	0	0	0	0	0	0	0	0	0	0	0
gene-KI387_037494	B3	0	0	0	0	0	0	0	0	0	0	0	0	0	0	0	0	0	0	0	0	0	0	0	0	0	0	0	0	0	0	0	0	0	0	0	0	0	0	0	0	0	0	0	0	0	0
gene-KI387_037503	B3	0.71	1.54	1.75	0.46	0.11	0	0	1.72	0.25	2.28	1.14	0.68	1.25	1.06	1.18	1.8	1.9	0.95	2.28	1.05	1.09	0.64	0	0.51	1.14	0.84	1.98	2	3.31	0.9	2.02	0	0.98	1.98	1.48	2.58	2.45	6.31	2.85	4.87	0.98	1.83	1.17	3.05	1.58	2.66
gene-KI387_037733	MYB	0	0	0	0	0	0	0	0	0	0	0	0	0	0	0	0	0	0	0	0	0	0	0	0	0	0	0	0	0.13	0.1	0.1	0	0	0	0	0	0.2	0	0.21	0	0	0	0	0	0	0
gene-KI387_037774	MYB-related	1.39	2.3	0.97	1.16	3.01	3.67	4.48	6.1	4.87	4.3	2.86	6.17	3.46	6.07	6.72	5.64	3.9	3.57	3.85	3.4	2.81	2.77	2.87	2.44	3.09	2.66	2.58	2.28	2.49	1.93	2.23	4.19	4.36	4.54	4.2	5.16	3.74	3.48	3.39	3.3	3.93	3.53	4	2.43	2.34	2.56
gene-KI387_037903	C2C2-GATA	46.38	62.05	41.63	43.6	4.88	3.87	45.98	11.25	39.54	6.43	46.7	14.11	14.79	9.44	14.22	17.73	38.82	40.7	35.1	19.19	20.9	15.21	42.53	37.65	41.59	57.57	37.56	44.67	62.65	64.43	50.7	42.19	39.93	47.01	31.97	22.21	23.21	103.54	84.11	77.82	38.03	53.18	52.13	36.48	44.41	43.71
gene-KI387_037910	bHLH	14.02	5.9	10.77	3.25	2.85	1.7	36.67	72.44	40.47	63.73	22.98	48.2	46.34	43.34	24.02	45.2	13.06	14.24	15.37	4.35	2.39	4.58	15.53	19.34	21.6	84.53	82.24	99.74	103.71	93.27	92.67	4.22	4.97	7.08	125.52	132.51	106.81	205.25	173.03	192.99	7.09	6.17	9.39	2.91	1.06	2.03
gene-KI387_037926	WRKY	28.91	5.81	2.67	8.25	5.12	3.72	34.01	24.44	34.25	22.96	34.1	21.26	14.01	19.11	18.55	22.1	4.77	2.87	2.69	13.02	10.08	10.2	20.84	22.84	20.47	15.41	9.58	15.16	4.92	3.87	3.06	4.57	3.34	3.6	9.42	16.87	22.45	5.47	2.38	2.33	24.92	35.09	24.9	10.16	7.38	13.2
gene-KI387_037986	VOZ	11.75	41.4	26.17	26.41	17.05	29.28	9.24	19.93	8.3	18.41	11.37	23.17	15.49	18.79	19.99	19.98	39.38	33.05	30.74	28.29	28.4	24.05	27.11	24.1	23	36.55	38.07	41.57	40.3	45.81	47.2	44.13	32.86	39.29	40.32	35.62	34.36	55.22	52.76	58.39	46.52	37.14	36.13	57.95	59.65	64.63
gene-KI387_037989	B3-ARF	9.43	7.05	4.04	4.83	0.51	0.3	0.71	0.96	0.26	1.11	0.31	1.07	0.8	1.47	0.46	1.1	1.27	1.54	1.19	1.22	1.47	1.02	7.02	5.11	5.82	8.94	7.81	10.92	1.07	0.51	0.63	7.51	6.88	7.65	5.43	10.14	14.79	0.8	1.21	0.77	6.29	6.86	7.16	9.25	8.79	7.88
gene-KI387_038035	MYB	8.9	4.53	4.23	4.21	4.61	5.01	10.43	9.08	6.64	5.86	1.32	7.59	10.81	11.55	9.67	6.99	7	7.7	6.74	8.23	5.35	4.74	15.86	14.8	15.41	13.87	10.94	14.41	11.09	9.76	10.77	16.09	14.38	18.21	13.5	13.82	11.75	14.39	13.82	13.76	23.59	20.53	20.7	13.78	16.02	13.76
gene-KI387_038078	MYB	45.72	7.06	10.18	13.79	3.73	17.47	34.38	15.91	20.2	8.63	34.72	11.32	15.03	13.07	32.97	9.29	48.12	65.51	63.48	34.63	35.72	42.45	100.91	105.09	113.35	74.8	55.28	47.79	130.41	128.39	124.27	18.09	18.44	20.5	78.76	101.59	49.57	297.24	288.06	370.14	177.85	101.87	107.66	53.4	44.92	49.69
gene-KI387_038097	AP2/ERF-ERF	5.24	0.87	2.36	0.93	0.65	0.25	0.25	2.63	0.51	0.93	1.38	0.34	0.21	2.16	2.4	0.92	1.05	1.24	1.32	1.36	0.98	1.29	4.98	3.89	3.47	2.12	2.9	2.71	4.58	6.59	3.65	2.81	2.74	4.52	4	0.52	0.68	4.57	2.41	3.12	0.25	4.03	2.13	0.26	1.37	0.25
gene-KI387_038194	C2C2-Dof	8.74	14.26	9.25	6.97	10.33	10.43	17.14	18.66	15.13	13.87	7.73	12.32	15.82	17.32	12.5	14.42	21.26	22.89	22.4	15.54	15.29	15.33	8.08	13.04	12.47	16.07	21.77	20.69	18.35	19.05	18.95	7.85	8.69	8.71	23.58	16.44	14.39	28.06	20.93	33	11.43	13.87	10.96	15.48	11.97	12.05
gene-KI387_038267	MYB	1.4	3.32	1.48	0.28	0.15	2.18	7.02	6.38	14.4	10.02	28.05	9.46	0.85	4.65	2.63	8.47	0.24	0	0.53	1.74	1.51	2.26	4.64	3.52	3.77	17.08	23.64	19.09	33.07	33.91	39.37	0.33	0.53	0.43	57.32	48.18	34.85	15.52	18.64	13.93	2.05	1.5	2.69	0.77	0.49	0.11
gene-KI387_038533	GARP-G2-like	5.18	0	2.71	1.44	0	2.21	0	12.26	0	0	0	15.44	9.2	11.12	0	0	0	0	1.66	0	1.17	1.16	24.26	4.7	0	9.2	15.87	18.26	19.02	4.63	52.48	0	12.69	18.38	5	19.26	5.76	52.32	37.99	50.13	13.89	10.34	13.26	25.26	5.09	9.84
gene-KI387_038700	GeBP	40.83	80.13	62.15	42.43	60.02	79.41	39.13	63.98	52.05	66.93	57.88	93.25	68.36	91.37	111.16	91.28	95.5	107.65	96.43	64.32	55.13	65.93	129.23	129.45	116.27	85.83	108.99	96.22	115.48	110.22	120.7	321.24	309.97	331.41	83.35	72.09	73.5	170.33	128.75	153.88	183.13	158.65	157.74	415.44	446.2	415.1
gene-KI387_038702	NAC	1.11	8.46	4.06	1.84	4.91	8.22	4.75	6.93	12.46	12.96	12.37	17.98	2.23	9.32	27.31	23.73	19.77	21.38	20.53	9.98	9.12	6.91	16.41	14.03	17.71	12.2	18.4	13.32	49.82	50.01	43.41	8.17	9.28	10.4	12.64	7.91	9.31	49.49	39.46	35.31	20.66	21.7	22.36	17.34	16.66	15.33
gene-KI387_038732	bZIP	9.14	0	0	3.7	6.38	3.45	0	0	0	0	0	0	0	0	0	0	13.98	16.58	10.52	12.94	6.73	9.39	39.72	0	74.54	69.33	25.71	0	0	0	0	24.69	32.44	62.2	0	0	27.66	0	0	25.97	60.32	0	21.23	0	0	22.55
gene-KI387_038734	bZIP	14.78	14.12	14.54	17.99	25.15	30.85	106.23	90.76	90.09	98.66	83.01	89.98	112.26	99.24	118.53	81.12	48.52	53.86	48.64	20.62	18.26	17.04	27.94	31.63	38.57	41.75	33.71	46.59	36.93	37.04	40.15	41.17	43.62	48.53	37.12	40.85	37.89	80.6	73.12	86.24	40.05	43.06	38.39	50.04	44.76	45.31
gene-KI387_038737	C2C2-YABBY	0.6	1.15	1.46	2.04	0	0	0	0	0	0	0	0	0	0	0	0	0	0	0	0	0	0	0	0	0	2.24	6.35	2.76	0.54	0	0.81	0	0	0	4.38	1.87	3.24	0	0	0	0	0	0	0	0	0
gene-KI387_038977	MYB	1.07	3.03	1.01	1.05	1.05	0.64	0.57	0.65	0.39	0.7	0.71	1.72	1.32	0.95	3.29	1.14	4.46	3.56	4.17	5.02	4.16	3.61	3.04	4.22	4.6	5.64	3.97	5.52	2.8	3.6	4.39	5.03	6.46	5.71	5.22	5.94	4.68	7.06	6.71	7.4	2.98	3.86	3.79	5.57	6.5	6.01
gene-KI387_038991	MADS-M-type	0	0	0	0	0	0	0	0	0	0	0	0	0	0	0	0	0	0.15	0.09	0	0.07	0	0	0	0	0.56	0.58	0.59	0.16	0.24	0.24	0	0	0	0.53	0.14	0	0	0.13	0	0	0	0	0	0	0
gene-KI387_039009	E2F-DP	5.86	13.99	9.26	5.09	4.65	1.98	6.2	6.55	7.43	7.83	7.74	8.7	5.44	6.77	11.19	9.68	9.23	9.15	8.44	7.4	7.06	6.25	11.82	12.24	8.38	13.52	16.08	13.13	33.38	35.25	35.6	12.11	13.15	12.55	21.41	20.2	16.72	31.76	37.55	40.35	7.01	8.73	9	13.25	10.46	11.95
gene-KI387_039024	MYB	8.36	11.73	2.97	12.06	1.93	2.32	9.74	4.2	7.66	5.11	7.4	6.77	7.24	4.4	15.64	5.44	10.53	10.67	15.86	9.79	8.59	6.16	10.54	9.45	12.07	16.19	17.81	12.2	7.35	10.72	9.96	9.19	11.06	10.37	31.03	34.18	18.74	27.17	18.69	20.73	16.88	23.62	24.17	18.65	18.57	19.01
gene-KI387_039068	MYB	0.77	3.64	1.77	0.73	0.71	1.84	0.28	0.87	1.06	1.04	0.35	2.56	0.08	1.31	2.81	1.58	3.64	3.2	2.77	2.74	2.42	1.4	1.24	1.28	0.35	4.82	6.1	7.43	13.39	17.09	14.81	0.93	1	0.5	3.46	5.35	7.41	5.85	5.5	6.84	0.81	0.38	0.19	0.41	0.09	0.6
gene-KI387_039072	HB-HD-ZIP	0	0	0	0	0	0	0	0	0	0	0	0	0	0	0	0	0	0	0	0	0	0	0	0	0	0	0	0	0	0	0	0	0	0	0	0	0	0	0	0	0	0	0	0	0	0
gene-KI387_039086	HB-HD-ZIP	0	2.31	0.6	0.16	0.22	2.03	15.17	10.2	28.27	18.39	78.73	27.28	3.92	10.3	67.37	25.18	2.69	3.66	3.55	5.57	2.75	3.57	0.64	0.8	1.18	4.14	5.49	5.08	0.94	2.33	1.4	1.31	0.51	0.77	4.1	2.42	1.86	0	0.25	0.8	0	0	0.49	0.26	0	0.5
gene-KI387_039122	bHLH	0	0	0	0	0	0	0	0	0	0	0	0	0	0	0	0	0	0	0	0	0	0	0	0	0	0	0	0	0	0	0	0	0	0	0	0	0	0	0	0	0	0	0	0	0	0
gene-KI387_039170	SRS	1.29	7.33	4	5.55	14.63	3.31	22.62	22.2	33.42	28.78	34.88	31.55	10.97	23.99	48.7	32.95	27.82	29.03	24.85	20.03	19.03	18.36	33.29	33.69	38.62	14.09	11.32	6.15	95.64	81.04	82.3	49.9	46.57	45.71	16.36	13.77	10.25	59.27	48.91	50.57	24.88	24.09	23.39	32.77	34.75	32.02
gene-KI387_039212	MYB	3.84	30.15	5.73	11.3	19.3	0.75	7.12	12.09	12.23	5.71	24.5	11.02	9.9	9.8	17.02	9.92	13.21	20.64	17.93	2.59	2.58	3.93	13.23	13.41	14.1	14.41	18.29	18.82	34.89	34.76	34.25	39.09	34.4	35.45	26.68	19.78	25.34	57.56	64.49	72.51	7.08	5.06	5.9	12.94	12.58	12.22
gene-KI387_039237	AP2/ERF-ERF	1.25	2.15	0.2	0.43	0	0	0.38	0.89	0.39	0.71	0.35	0.53	0	0.82	0	0	0.72	0.38	0.23	0.21	0	1.06	0.9	0.74	0	0.61	0	0.64	1.31	1.29	0.33	6.55	3.24	3.61	2.14	0.38	0.98	0.43	0	0.37	0	0	0	0.37	2.63	4.55
gene-KI387_039303	NAC	21.54	100.39	49.53	340.41	21.49	61.28	142.9	74.06	128.15	57.88	158.89	91.05	89.57	107.63	55.98	81.22	9.54	7.23	6.87	16.01	15.73	12.69	38.73	33.99	31.37	13.32	23.46	19.74	17.51	12.18	17.24	26.36	28.97	27.24	28.33	22.53	25.03	2.84	12.14	17.58	84.12	106.6	82.05	261.09	267.13	260.69
gene-KI387_039308	NAC	367.76	32.64	17.98	122.1	46.61	105.85	446.61	134.94	477.82	140.33	554.45	81.21	209.8	68.25	34.75	88.68	6.05	6.02	5.69	14	17.18	13.4	675.89	757.04	735.57	233.17	156.51	151.8	210.43	154.21	169.79	780.29	723.17	763.83	166.55	230.56	133.49	115.57	123.39	125.39	888.62	863.79	833.05	832.81	856.47	849.74
gene-KI387_039343	EIL	46.06	73.83	56.91	62.16	86.1	118.09	36.27	48.25	43.83	66.38	44.71	81.24	44.05	62.33	80.37	82.99	50.48	57.53	45.58	51.17	47.04	37.09	71.07	70.56	66.55	123.32	117.64	121.14	113.01	94.88	107.4	106.51	108.46	112.4	159.85	154.08	124.14	91.25	92.34	101.47	115.23	98.21	97.11	108.41	109.18	106.14
gene-KI387_039403	bHLH	0	0	0	0	0	0	0	0	0	0	0	0	0	0	0	0	0	0	0	0	0	0	0	0	0	0	0	0	0	0	0	0	0	0	0	0	0	0	0	0	0	0	0	0	0	0
gene-KI387_039700	AP2/ERF-ERF	3.32	10.03	4.9	8.83	5.92	3.35	0	0	0	0	0	0	0	0	0	0	0	0.3	0	0	0	0	13.72	16.68	14.45	3.43	6.32	6.23	12.63	12.85	14.02	21.23	20.78	24.99	8.25	3.04	11.45	20.05	17.34	20.89	9.81	12.95	10.9	17.91	15.55	21.35
gene-KI387_039738	C2C2-GATA	0.55	0.13	0	0	0.25	0.57	1.07	0.62	0.73	1.16	0.99	0.73	1.96	0.77	2.37	1.3	2.26	1.57	2.25	1.61	0.84	1.48	0.46	0	0.21	0.63	0.33	0.5	14	16.98	17.16	0.94	0.37	0	1.3	1.93	0.17	26.66	28.01	31.49	0.37	0	0.18	0.19	0.34	0.54
gene-KI387_039810	C2H2	5.52	6.58	8.96	2.98	6.25	1.64	4.99	4.86	4.53	4.28	5.73	6.81	7.15	7.76	13.52	6.69	7.19	7.45	7.83	6.45	6.19	6.37	2.67	2.79	4	5.5	5.58	5.23	9.65	9.54	8.71	4.15	4.68	4.97	9.57	10.97	9.93	18.32	18.16	19.54	1.64	3.46	1.87	1.99	2.99	1.62
gene-KI387_039818	HB-other	32.6	30.23	26.77	54.55	17.09	13.01	40.69	28.25	37.77	25.9	29.04	28.35	26.48	29.05	44.51	28.24	18.94	18.87	16.5	17.53	16.8	12.97	53.55	57.25	55.97	41.54	52.28	48.26	35.07	36.31	33.48	58.17	54.89	52.37	44.99	42.19	44.92	55.98	54.07	57.35	76.23	90.16	80.79	55.34	53.97	51.15
gene-KI387_043710	MYB-related	0	0	0	0	0	0	0	0	0	0	0	0	0	0	0	0	0	0.24	0	0	0	0	0	0	0.76	0.49	0	0	0.53	0.59	0.19	0	0	0	0.43	0	0	0	0.21	0.23	0	0	0.41	0	0	0.21
gene-KI387_043718	LOB	416.92	158.23	369.03	238.62	16.93	0.85	53.52	13.39	166.77	16.28	223.6	12.63	20.01	4.53	13.72	5.64	2.16	0.57	1.59	0.83	1.85	1.42	199.91	198.38	194.17	71.95	141.32	113.44	36.16	27.84	27.84	342.23	364.52	345.2	101.97	100.31	62.06	9.53	8.4	0	95.75	116.53	90.2	221.02	159.94	188.8
gene-KI387_043759	HB-WOX	0	0	0	0	0	0	0	0	0	0	0	0	0	0	0	0	0	0	0	0	0	0	0	0	0	0	0	0	0	0	0	0	0	0	0	0	0	0	0.28	0.62	0	0	0	0	0	0
gene-KI387_043807	AP2/ERF-ERF	1412.24	0.9	6.62	105.54	36.36	57.43	1550	1408.6	905.73	799.08	433.34	458.31	1041.92	867.59	338.99	509.6	63.24	84.31	50.92	46.35	51.05	64.42	772.73	801.79	839.23	64.42	33.67	51.3	32.27	31.52	27.82	491.62	514.6	513.32	36.59	29.74	43.45	219.62	79.16	63.94	468.41	650.86	597.65	256.73	258.56	286.29
gene-KI387_043816	GRAS	3.84	3.99	1.55	0.68	10.02	43.08	3.05	13.08	7.07	36.17	17.3	43.12	6.36	19.87	7.05	44.74	3.06	1.36	1.4	3.2	3.88	3.77	41.72	48.28	41.26	9.98	8.56	10.51	2.62	3.04	1.95	63.64	64.43	70.02	13.33	10.51	15.63	5.47	7.47	6.85	97.86	53.06	57.22	55.24	47.8	53.58
gene-KI387_043827	GRAS	21.64	55.39	25.21	67.87	16.17	29.15	5	7.73	3.25	10.34	4.64	11.88	6.61	12.05	22.87	11.52	20.12	14.77	15.94	17.02	14.1	12.82	31.26	34.61	30.79	25.95	27.45	22.12	37.33	35.54	37.76	34.94	33.54	33.17	27.14	18.08	18.87	52.66	28.51	32.65	31.28	22.36	25.65	28.16	22.69	23.22
gene-KI387_043844	HSF	3.13	0	0	0.22	0.16	0.35	12.37	3.81	2.92	0.76	3.7	3.37	8.61	6.16	0.79	1.01	0.5	2.38	0.95	0.22	0.51	0.74	41.82	33.34	28.55	303.52	6.78	31.84	1.84	2.73	2.42	11.9	10.25	17.18	1.88	1.2	1.73	4.57	38.32	0.78	30.82	32.21	18.96	23.97	21.84	30.59
gene-KI387_043904	NF-YA	0.12	0	0.1	0.21	0.08	0.87	0.16	0.56	0	0.3	0.15	0.44	0.27	0.17	0	0.19	0.37	0.19	0.11	0	0	0.18	0	0	0.58	0	0	0	0	0	0	0	0	0	0	0.35	0.3	0.21	0.49	0.17	0	0	0	0.17	0	0
gene-KI387_043911	C3H	0	0	0	0	0	0.08	0.16	0.36	0.8	0.58	0.29	0.64	0.39	0.84	0.59	0.94	0.95	0.46	2.23	0.51	0.83	0.53	0	0	0.19	0	0	0.29	0.4	0.44	0.44	0.5	0	0.16	0.33	0	0	1.6	0.94	0.17	0	0	0	0.17	0.15	0.16
gene-KI387_043983	C2C2-Dof	1.83	3.51	1.42	1.56	5.33	0	3.1	5.94	4.04	1.55	2.11	2.94	3.82	4.37	3.48	2.59	9.41	6.62	4.85	9.08	8.71	5.29	40.02	33.62	34.92	6.81	6.99	5.88	6.54	7.77	7.41	29.16	23.5	27.19	6.52	7.53	6.26	2.65	1.11	1.59	13.35	11.37	16.82	13.94	14.18	13.29
gene-KI387_044008	GRAS	0	0	0	0	0	0	0	0	0	0	0	0	0	0	0	0	0	0	0	0	0	0	0	0	0	0	0	0	0	0	0	0	0	0	0	0	0	0	0	0	0	0	0	0	0	0
gene-KI387_044050	bHLH	0	0	0	0	0	0	1.73	0	10.4	0	7.98	0	0	0	0	0.35	0	0	0	0	0	0	6.38	3.82	2.29	0	0	0	1.73	0.26	0	0.29	0.28	0	0.28	0.3	0	0	0	0	1.12	0.35	0.27	0	0	0
gene-KI387_044136	AP2/ERF-ERF	10.54	25.9	5.46	5.67	18.99	20.32	90.19	43.53	120.68	76.26	248.48	61.51	69.85	30.05	36.39	65.48	12.43	7.09	6.64	7.42	11.98	12.73	68.88	64.33	72.45	64.97	108.04	72.58	100.41	106.44	118.73	131.89	140.96	133.95	166.41	254.52	137.23	40.8	46.17	48.74	138.86	80.23	96.88	159.88	146.51	176.78
gene-KI387_044206	AP2/ERF-ERF	5.83	5.91	2.86	6.49	5.01	8.83	16.02	13.5	13.74	7.86	8.5	10.58	10.85	15.36	17.09	12.24	6.48	7.03	7.07	4.7	4.09	3.48	6.16	6.55	5.5	8.81	7.53	9.85	17.57	22.57	20.69	5.82	5.75	5.29	6.25	4.77	5.47	28.67	30.09	29.4	3.95	3.94	4.09	5.22	5.7	4.32
gene-KI387_044218	WRKY	37.26	12.94	10.55	15.13	3.24	0.46	17.85	9.24	16.94	6.65	11.6	7.64	6.66	5.55	3.33	5.99	1.52	0.45	0.74	1.31	0.6	1.28	6.01	7.18	5.72	33.05	15.59	22.5	13.32	8.26	10.75	1.08	0.95	1.53	8.22	15.06	21.3	10.53	11.39	13.71	3.76	7.3	5.17	4.92	3.69	4.56
gene-KI387_044374	LOB	0	0	0	0	0	0	0	0	0	0	0	0	0	0	0	0	0	0	0	0	0	0	0.99	1.25	1.62	0	0	0	6.09	2.36	2.54	2.24	3.37	2.8	0	0	0	0.73	1.15	1.87	4.76	2.98	2.47	0.41	1.09	0
gene-KI387_044692	MADS-M-type	0	0	0	0	0	0	0	0	0	0	0	0	0	0	0	0	0	0	0	0	0	0	99.05	69.12	20.77	0	0	0	0	0	0	0	0	0	0	0	0	0	0	0	0	38.13	0	0	0	0
